# Supplementary material
Source: PubMed Central journal article supplement (PMC4245040)
Supplement: supp_ddu388_ddu388supp_table1.pdf [file supp_ddu388_ddu388supp_table1.pdf]

**Supplementary table 1**

Summary of peptides identified from Dp427

| Dataset name | Peptide location | Mass    | Peptide sequence                    | Phosphorylated residue |  |
|--------------|------------------|---------|-------------------------------------|------------------------|--|
| KB003        | 24-31            | 992.51  | <a href="#">WINAQFSK</a>            |                        |  |
| KB006        | 24-31            | 992.51  | <a href="#">WINAQFSK</a>            |                        |  |
| KB013        | 24-31            | 992.51  | <a href="#">WINAQFSK</a>            |                        |  |
| KB012        | 25-32            | 953.5   | <a href="#">INAQFSKF</a>            |                        |  |
| KB021        | 33-41            | 1070.55 | <a href="#">GKQHIDNLF</a>           |                        |  |
| KB004        | 35-48            | 1628.78 | <a href="#">QHIDNLFSDLQDGK</a>      |                        |  |
| KB004        | 35-49            | 1784.88 | <a href="#">QHIDNLFSDLQDGKR</a>     |                        |  |
| KB017        | 42-51            | 1143.62 | <a href="#">SDLQDGKRLL</a>          |                        |  |
| KB018        | 42-51            | 1143.62 | <a href="#">SDLQDGKRLL</a>          |                        |  |
| KB021        | 42-51            | 1143.62 | <a href="#">SDLQDGKRLL</a>          |                        |  |
| KB003        | 50-61            | 1298.74 | <a href="#">LLDLLEGLTGQK</a>        |                        |  |
| KB004        | 50-61            | 1298.74 | <a href="#">LLDLLEGLTGQK</a>        |                        |  |
| KB017        | 73-81            | 955.55  | <a href="#">ALNNVNKAL</a>           |                        |  |
| KB003        | 87-105           | 2023    | <a href="#">NNVDLVNIGSTDIVDGNHK</a> |                        |  |
| KB004        | 87-105           | 2023    | <a href="#">NNVDLVNIGSTDIVDGNHK</a> |                        |  |
| KB017        | 92-104           | 1339.64 | <a href="#">VNIGSTDIVDGNH</a>       |                        |  |
| KB017        | 92-106           | 1580.82 | <a href="#">VNIGSTDIVDGNHKL</a>     |                        |  |
| KB004        | 90-105           | 1695.84 | <a href="#">DLVNIGSTDIVDGNHK</a>    |                        |  |
| KB003        | 126-138          | 1419.7  | <a href="#">TIMAGLQQTNSEK</a>       |                        |  |
| KB006        | 126-138          | 1419.7  | <a href="#">TIMAGLQQTNSEK</a>       |                        |  |
| KB003        | 139-145          | 885.54  | <a href="#">ILLSWVR</a>             |                        |  |
| KB013        | 139-145          | 885.54  | <a href="#">ILLSWVR</a>             |                        |  |
| KB017        | 147-159          | 1550.78 | <a href="#">STRNYPQVNVINF</a>       |                        |  |
| KB018        | 147-159          | 1550.78 | <a href="#">STRNYPQVNVINF</a>       |                        |  |
| KB021        | 149-159          | 1362.7  | <a href="#">RNYPQVNVINF</a>         |                        |  |
| KB021        | 160-170          | 1149.53 | <a href="#">TSSWSDGLALN</a>         |                        |  |
| KB021        | 182-190          | 1070.48 | <a href="#">DWNSVVSQH</a>           |                        |  |
| KB021        | 182-194          | 1457.65 | <a href="#">DWNSVVSQHSATQ</a>       |                        |  |
| KB003        | 196-204          | 1041.56 | <a href="#">LEHAFNIAK</a>           |                        |  |
| KB004        | 196-204          | 1041.56 | <a href="#">LEHAFNIAK</a>           |                        |  |

|       |         |         |                                        |  |  |
|-------|---------|---------|----------------------------------------|--|--|
| KB006 | 196-204 | 1041.56 | <a href="#">LEHAFNIAK</a>              |  |  |
| KB008 | 196-204 | 1041.56 | <a href="#">LEHAFNIAK</a>              |  |  |
| KB013 | 196-204 | 1041.56 | <a href="#">LEHAFNIAK</a>              |  |  |
| KB003 | 212-225 | 1575.77 | <a href="#">LLDPEDVATTYPDK</a>         |  |  |
| KB004 | 212-225 | 1575.77 | <a href="#">LLDPEDVATTYPDK</a>         |  |  |
| KB004 | 212-226 | 1703.86 | <a href="#">LLDPEDVATTYPDKK</a>        |  |  |
| KB006 | 212-226 | 1703.86 | <a href="#">LLDPEDVATTYPDKK</a>        |  |  |
| KB004 | 213-226 | 1590.78 | <a href="#">LDPEDVATTYPDKK</a>         |  |  |
| KB004 | 214-226 | 1477.69 | <a href="#">DPEDVATTYPDKK</a>          |  |  |
| KB004 | 215-226 | 1362.67 | <a href="#">PEDVATTYPDKK</a>           |  |  |
| KB004 | 247-256 | 1184.62 | <a href="#">AIQEVEMLPR</a>             |  |  |
| KB012 | 309-324 | 1716.8  | <a href="#">VATSDSTQSPYPSQHL</a>       |  |  |
| KB017 | 309-324 | 1716.8  | <a href="#">VATSDSTQSPYPSQHL</a>       |  |  |
| KB018 | 309-324 | 1716.8  | <a href="#">VATSDSTQSPYPSQHL</a>       |  |  |
| KB021 | 309-324 | 1716.8  | <a href="#">VATSDSTQSPYPSQHL</a>       |  |  |
| KB021 | 325-346 | 2498.15 | <a href="#">EAPRKSLDSSLMETEVNLSY</a>   |  |  |
| KB021 | 347-356 | 1174.59 | <a href="#">QTALEEVLSW</a>             |  |  |
| KB003 | 366-378 | 1416.67 | <a href="#">AQGEISNDVEEVK</a>          |  |  |
| KB006 | 366-378 | 1416.67 | <a href="#">AQGEISNDVEEVK</a>          |  |  |
| KB013 | 366-378 | 1416.67 | <a href="#">AQGEISNDVEEVK</a>          |  |  |
| KB017 | 388-397 | 1131.51 | <a href="#">MMDLTSHQGL</a>             |  |  |
| KB018 | 388-397 | 1131.51 | <a href="#">MMDLTSHQGL</a>             |  |  |
| KB021 | 388-402 | 1613.79 | <a href="#">MMDLTSHQGLVGNVL</a>        |  |  |
| KB003 | 412-432 | 2418.13 | <a href="#">GKLSEDEEAEVQEQMNULLNSR</a> |  |  |
| KB004 | 412-432 | 2418.13 | <a href="#">GKLSEDEEAEVQEQMNULLNSR</a> |  |  |
| KB006 | 412-432 | 2418.13 | <a href="#">GKLSEDEEAEVQEQMNULLNSR</a> |  |  |
| KB003 | 414-432 | 2233.02 | <a href="#">LSEDEEAEVQEQMNULLNSR</a>   |  |  |
| KB004 | 414-432 | 2233.02 | <a href="#">LSEDEEAEVQEQMNULLNSR</a>   |  |  |
| KB006 | 414-432 | 2233.02 | <a href="#">LSEDEEAEVQEQMNULLNSR</a>   |  |  |
| KB003 | 450-458 | 1087.57 | <a href="#">VLMDLQNQK</a>              |  |  |
| KB006 | 450-458 | 1087.57 | <a href="#">VLMDLQNQK</a>              |  |  |
| KB021 | 458-465 | 1045.54 | <a href="#">KLKELDDW</a>               |  |  |
| KB003 | 459-468 | 1259.68 | <a href="#">LKELDDWLTK</a>             |  |  |

|       |         |         |                                    |  |  |
|-------|---------|---------|------------------------------------|--|--|
| KB004 | 459-468 | 1259.68 | <a href="#">LKELDDWLTK</a>         |  |  |
| KB004 | 459-472 | 1774.91 | <a href="#">LKELDDWLTKTEER</a>     |  |  |
| KB004 | 460-468 | 1146.59 | <a href="#">KELDDWLTK</a>          |  |  |
| KB006 | 461-468 | 1018.5  | <a href="#">ELDDWLTK</a>           |  |  |
| KB004 | 461-472 | 1533.73 | <a href="#">ELDDWLTKTEER</a>       |  |  |
| KB005 | 462-471 | 1248.59 | <a href="#">LDDWLKTEE</a>          |  |  |
| KB007 | 462-471 | 1248.59 | <a href="#">LDDWLKTEE</a>          |  |  |
| KB006 | 473-489 | 2004.97 | <a href="#">TKKMEEEPFGPDLEDLK</a>  |  |  |
| KB003 | 475-489 | 1775.83 | <a href="#">KMEEEPFGPDLEDLK</a>    |  |  |
| KB004 | 475-489 | 1775.83 | <a href="#">KMEEEPFGPDLEDLK</a>    |  |  |
| KB006 | 475-489 | 1775.83 | <a href="#">KMEEEPFGPDLEDLK</a>    |  |  |
| KB003 | 476-489 | 1647.73 | <a href="#">MEEEPFGPDLEDLK</a>     |  |  |
| KB004 | 476-489 | 1647.73 | <a href="#">MEEEPFGPDLEDLK</a>     |  |  |
| KB006 | 476-489 | 1647.73 | <a href="#">MEEEPFGPDLEDLK</a>     |  |  |
| KB004 | 482-489 | 885.44  | <a href="#">GPDLEDLK</a>           |  |  |
| KB004 | 496-508 | 1612.84 | <a href="#">KVLQEDLEQEQVR</a>      |  |  |
| KB003 | 497-508 | 1484.75 | <a href="#">VLQEDLEQEQVR</a>       |  |  |
| KB013 | 497-508 | 1484.75 | <a href="#">VLQEDLEQEQVR</a>       |  |  |
| KB012 | 499-510 | 1485.71 | <a href="#">QEDLEQEQVRVN</a>       |  |  |
| KB017 | 499-510 | 1485.71 | <a href="#">QEDLEQEQVRVN</a>       |  |  |
| KB017 | 577-592 | 1796.86 | <a href="#">LSEKEDAMKNIQTSGF</a>   |  |  |
| KB021 | 577-592 | 1796.86 | <a href="#">LSEKEDAMKNIQTSGF</a>   |  |  |
| KB021 | 578-592 | 1683.78 | <a href="#">SEKEDAMKNIQTSGF</a>    |  |  |
| KB003 | 586-604 | 2194.01 | <a href="#">NIQTSGFKDQNMSSSLHK</a> |  |  |
| KB004 | 586-604 | 2194.01 | <a href="#">NIQTSGFKDQNMSSSLHK</a> |  |  |
| KB006 | 586-604 | 2194.01 | <a href="#">NIQTSGFKDQNMSSSLHK</a> |  |  |
| KB004 | 605-614 | 1158.69 | <a href="#">ISTLKIDLEK</a>         |  |  |
| KB017 | 609-622 | 1699.99 | <a href="#">KIDLEKKKPTMEKL</a>     |  |  |
| KB004 | 622-634 | 1400.79 | <a href="#">LSSLNQDLLSALK</a>      |  |  |
| KB021 | 641-649 | 1226.55 | <a href="#">KMEIWMENF</a>          |  |  |
| KB003 | 642-652 | 1453.65 | <a href="#">MEIWMENFAQR</a>        |  |  |
| KB004 | 642-652 | 1453.65 | <a href="#">MEIWMENFAQR</a>        |  |  |
| KB006 | 642-652 | 1453.65 | <a href="#">MEIWMENFAQR</a>        |  |  |

|       |         |         |                                      |  |  |
|-------|---------|---------|--------------------------------------|--|--|
| KB003 | 700-712 | 1466.75 | <a href="#">HAQEELPPPPQK</a>         |  |  |
| KB006 | 700-712 | 1466.75 | <a href="#">HAQEELPPPPQK</a>         |  |  |
| KB006 | 714-723 | 1215.66 | <a href="#">RQITVDSELR</a>           |  |  |
| KB003 | 715-723 | 1059.56 | <a href="#">QITVDSELR</a>            |  |  |
| KB006 | 715-723 | 1059.56 | <a href="#">QITVDSELR</a>            |  |  |
| KB013 | 715-723 | 1059.56 | <a href="#">QITVDSELR</a>            |  |  |
| KB017 | 727-736 | 1213.56 | <a href="#">DVDITELHSW</a>           |  |  |
| KB018 | 727-736 | 1213.56 | <a href="#">DVDITELHSW</a>           |  |  |
| KB021 | 727-736 | 1213.56 | <a href="#">DVDITELHSW</a>           |  |  |
| KB017 | 737-749 | 1465.74 | <a href="#">ITRSEAVLQSSEF</a>        |  |  |
| KB018 | 737-749 | 1465.74 | <a href="#">ITRSEAVLQSSEF</a>        |  |  |
| KB021 | 737-749 | 1465.74 | <a href="#">ITRSEAVLQSSEF</a>        |  |  |
| KB003 | 740-753 | 1584.78 | <a href="#">SEAVLQSSEFAVYR</a>       |  |  |
| KB006 | 740-753 | 1584.78 | <a href="#">SEAVLQSSEFAVYR</a>       |  |  |
| KB004 | 742-754 | 1496.8  | <a href="#">AVLQSSEFAVYRK</a>        |  |  |
| KB021 | 753-765 | 1514.81 | <a href="#">RKEGNISDLQEKV</a>        |  |  |
| KB017 | 753-766 | 1628.85 | <a href="#">RKEGNISDLQEKVN</a>       |  |  |
| KB018 | 753-766 | 1628.85 | <a href="#">RKEGNISDLQEKVN</a>       |  |  |
| KB003 | 785-804 | 2116.02 | <a href="#">SAQALVEQMANEGVNAESIR</a> |  |  |
| KB006 | 785-804 | 2116.02 | <a href="#">SAQALVEQMANEGVNAESIR</a> |  |  |
| KB017 | 800-810 | 1230.62 | <a href="#">AESIRQASEQL</a>          |  |  |
| KB021 | 811-817 | 938.42  | <a href="#">NSRWTEF</a>              |  |  |
| KB017 | 822-830 | 1194.57 | <a href="#">SERVNWLEY</a>            |  |  |
| KB021 | 822-830 | 1194.57 | <a href="#">SERVNWLEY</a>            |  |  |
| KB017 | 838-849 | 1495.7  | <a href="#">YNQLQQLEQMTT</a>         |  |  |
| KB021 | 838-854 | 2023.95 | <a href="#">YNQLQQLEQMTTTAENL</a>    |  |  |
| KB021 | 839-847 | 1130.54 | <a href="#">NQLQQLEQM</a>            |  |  |
| KB017 | 839-849 | 1332.63 | <a href="#">NQLQQLEQMTT</a>          |  |  |
| KB018 | 839-849 | 1332.63 | <a href="#">NQLQQLEQMTT</a>          |  |  |
| KB021 | 839-849 | 1332.63 | <a href="#">NQLQQLEQMTT</a>          |  |  |
| KB021 | 839-854 | 1860.89 | <a href="#">NQLQQLEQMTTTAENL</a>     |  |  |
| KB017 | 850-862 | 1418.76 | <a href="#">TAENLLKTQSTTL</a>        |  |  |
| KB017 | 854-862 | 1003.59 | <a href="#">LLKTQSTTL</a>            |  |  |

|       |         |         |                                   |  |  |
|-------|---------|---------|-----------------------------------|--|--|
| KB003 | 857-869 | 1375.72 | <a href="#">TQSTTLSEPTAIK</a>     |  |  |
| KB006 | 857-869 | 1375.72 | <a href="#">TQSTTLSEPTAIK</a>     |  |  |
| KB008 | 857-869 | 1375.72 | <a href="#">TQSTTLSEPTAIK</a>     |  |  |
| KB013 | 857-869 | 1375.72 | <a href="#">TQSTTLSEPTAIK</a>     |  |  |
| KB012 | 863-872 | 1072.58 | <a href="#">SEPTAIKSQL</a>        |  |  |
| KB017 | 863-872 | 1072.58 | <a href="#">SEPTAIKSQL</a>        |  |  |
| KB005 | 879-890 | 1366.76 | <a href="#">VNRLSALQPQIE</a>      |  |  |
| KB007 | 879-890 | 1366.76 | <a href="#">VNRLSALQPQIE</a>      |  |  |
| KB003 | 882-893 | 1366.78 | <a href="#">LSALQPQIEQLK</a>      |  |  |
| KB004 | 882-893 | 1366.78 | <a href="#">LSALQPQIEQLK</a>      |  |  |
| KB006 | 882-893 | 1366.78 | <a href="#">LSALQPQIEQLK</a>      |  |  |
| KB013 | 882-893 | 1366.78 | <a href="#">LSALQPQIEQLK</a>      |  |  |
| KB017 | 883-892 | 1125.6  | <a href="#">SALQPQIEQL</a>        |  |  |
| KB021 | 917-924 | 1028.48 | <a href="#">TNHFNHIF</a>          |  |  |
| KB021 | 925-938 | 1632.88 | <a href="#">DGVRAKEKELQTIF</a>    |  |  |
| KB021 | 929-938 | 1205.67 | <a href="#">AKEKELQTIF</a>        |  |  |
| KB004 | 931-945 | 1816.94 | <a href="#">EKELQTIFDTLPPMR</a>   |  |  |
| KB004 | 933-945 | 1559.8  | <a href="#">ELQTIFDTLPPMR</a>     |  |  |
| KB003 | 946-954 | 1113.51 | <a href="#">YQETMSSIR</a>         |  |  |
| KB006 | 946-954 | 1113.51 | <a href="#">YQETMSSIR</a>         |  |  |
| KB017 | 947-956 | 1237.58 | <a href="#">QETMSSIRTW</a>        |  |  |
| KB018 | 947-956 | 1237.58 | <a href="#">QETMSSIRTW</a>        |  |  |
| KB021 | 947-956 | 1237.58 | <a href="#">QETMSSIRTW</a>        |  |  |
| KB003 | 955-963 | 1105.54 | <a href="#">TWIQQSESK</a>         |  |  |
| KB018 | 957-968 | 1377.71 | <a href="#">IQQSESKLSVPY</a>      |  |  |
| KB021 | 957-968 | 1377.71 | <a href="#">IQQSESKLSVPY</a>      |  |  |
| KB005 | 962-973 | 1321.71 | <a href="#">SKLSVPYLSVTE</a>      |  |  |
| KB004 | 964-980 | 2057    | <a href="#">LSVPYLSVTEYEIMEER</a> |  |  |
| KB012 | 969-974 | 710.35  | <a href="#">LSVTEY</a>            |  |  |
| KB018 | 975-984 | 1216.65 | <a href="#">EIMEERLGKL</a>        |  |  |
| KB021 | 975-984 | 1216.65 | <a href="#">EIMEERLGKL</a>        |  |  |
| KB017 | 975-985 | 1344.71 | <a href="#">EIMEERLGKLQ</a>       |  |  |
| KB018 | 975-985 | 1344.71 | <a href="#">EIMEERLGKLQ</a>       |  |  |

|       |           |         |                                        |  |  |
|-------|-----------|---------|----------------------------------------|--|--|
| KB021 | 975-985   | 1344.71 | <a href="#">EIMEERLGKLO</a>            |  |  |
| KB021 | 975-987   | 1528.83 | <a href="#">EIMEERLGKLOAL</a>          |  |  |
| KB004 | 984-1006  | 2610.33 | <a href="#">LQALQSSLKEQQNGFNYSDTVK</a> |  |  |
| KB003 | 984-992   | 986.58  | <a href="#">LQALQSSLK</a>              |  |  |
| KB006 | 984-992   | 986.58  | <a href="#">LQALQSSLK</a>              |  |  |
| KB021 | 985-998   | 1576.78 | <a href="#">QALQSSLKEQQNGF</a>         |  |  |
| KB018 | 986-998   | 1448.73 | <a href="#">ALQSSLKEQQNGF</a>          |  |  |
| KB021 | 986-998   | 1448.73 | <a href="#">ALQSSLKEQQNGF</a>          |  |  |
| KB003 | 993-1006  | 1641.76 | <a href="#">EQQNGFNYSDTVK</a>          |  |  |
| KB004 | 993-1006  | 1641.76 | <a href="#">EQQNGFNYSDTVK</a>          |  |  |
| KB006 | 993-1006  | 1641.76 | <a href="#">EQQNGFNYSDTVK</a>          |  |  |
| KB013 | 993-1006  | 1641.76 | <a href="#">EQQNGFNYSDTVK</a>          |  |  |
| KB004 | 993-1010  | 2100.98 | <a href="#">EQQNGFNYSDTVKEMAK</a>      |  |  |
| KB012 | 999-1007  | 1067.51 | <a href="#">NYSDTVKE</a>               |  |  |
| KB012 | 999-1008  | 1198.55 | <a href="#">NYSDTVKEM</a>              |  |  |
| KB017 | 999-1008  | 1198.55 | <a href="#">NYSDTVKEM</a>              |  |  |
| KB018 | 999-1008  | 1198.55 | <a href="#">NYSDTVKEM</a>              |  |  |
| KB021 | 999-1008  | 1198.55 | <a href="#">NYSDTVKEM</a>              |  |  |
| KB021 | 1021-1031 | 1374.61 | <a href="#">LSEFEEIEGHW</a>            |  |  |
| KB021 | 1022-1031 | 1261.53 | <a href="#">SEFEEIEGHW</a>             |  |  |
| KB018 | 1073-1086 | 1582.82 | <a href="#">LKEEWPALGDAEIL</a>         |  |  |
| KB021 | 1073-1086 | 1582.82 | <a href="#">LKEEWPALGDAEIL</a>         |  |  |
| KB003 | 1075-1087 | 1469.74 | <a href="#">EEWPALGDAEILK</a>          |  |  |
| KB004 | 1075-1087 | 1469.74 | <a href="#">EEWPALGDAEILK</a>          |  |  |
| KB004 | 1078-1088 | 1153.67 | <a href="#">PALGDAEILKK</a>            |  |  |
| KB004 | 1095-1116 | 2309.22 | <a href="#">LLVGDIQTIQPSLNSVNEGGQK</a> |  |  |
| KB021 | 1109-1125 | 1863.92 | <a href="#">SVNEGGQKIKSEAELEF</a>      |  |  |
| KB003 | 1117-1128 | 1378.71 | <a href="#">IKSEAELEFASR</a>           |  |  |
| KB004 | 1117-1128 | 1378.71 | <a href="#">IKSEAELEFASR</a>           |  |  |
| KB006 | 1117-1128 | 1378.71 | <a href="#">IKSEAELEFASR</a>           |  |  |
| KB003 | 1119-1128 | 1137.53 | <a href="#">SEAELEFASR</a>             |  |  |
| KB006 | 1119-1128 | 1137.53 | <a href="#">SEAELEFASR</a>             |  |  |
| KB013 | 1119-1128 | 1137.53 | <a href="#">SEAELEFASR</a>             |  |  |

|       |           |         |                                      |       |       |
|-------|-----------|---------|--------------------------------------|-------|-------|
| KB021 | 1130-1140 | 1417.68 | <a href="#">ETELRELNTQW</a>          |       |       |
| KB004 | 1135-1145 | 1413.65 | <a href="#">ELNTQWDHICR</a>          | ELNpT | T1138 |
| KB017 | 1155-1165 | 1158.66 | <a href="#">KAGLDKTVSLQ</a>          |       |       |
| KB003 | 1167-1185 | 2425.02 | <a href="#">DLSEMHEWMTQAEERYLER</a>  |       |       |
| KB004 | 1167-1185 | 2425.02 | <a href="#">DLSEMHEWMTQAEERYLER</a>  |       |       |
| KB006 | 1167-1185 | 2425.02 | <a href="#">DLSEMHEWMTQAEERYLER</a>  |       |       |
| KB021 | 1175-1187 | 1659.71 | <a href="#">MTQAEERYLERDF</a>        |       |       |
| KB021 | 1175-1189 | 1951.81 | <a href="#">MTQAEERYLERDFEY</a>      |       |       |
| KB021 | 1176-1189 | 1820.77 | <a href="#">TQAEERYLERDFEY</a>       |       |       |
| KB007 | 1182-1188 | 970.44  | <a href="#">YLERDFE</a>              |       |       |
| KB005 | 1182-1201 | 2474.15 | <a href="#">YLERDFEYKTPDELQTAVEE</a> |       |       |
| KB012 | 1183-1189 | 970.44  | <a href="#">LERDFEY</a>              |       |       |
| KB021 | 1183-1189 | 970.44  | <a href="#">LERDFEY</a>              |       |       |
| KB004 | 1186-1203 | 2171.99 | <a href="#">DFEYKTPDELQTAVEEMK</a>   |       |       |
| KB004 | 1186-1204 | 2328.09 | <a href="#">DFEYKTPDELQTAVEEMKR</a>  |       |       |
| KB021 | 1188-1202 | 1781.8  | <a href="#">EYKTPDELQTAVEEM</a>      |       |       |
| KB005 | 1189-1201 | 1521.72 | <a href="#">YKTPDELQTAVEE</a>        |       |       |
| KB007 | 1189-1201 | 1521.72 | <a href="#">YKTPDELQTAVEE</a>        |       |       |
| KB012 | 1190-1200 | 1229.61 | <a href="#">KTPDELQTAVE</a>          |       |       |
| KB017 | 1190-1202 | 1489.7  | <a href="#">KTPDELQTAVEEM</a>        |       |       |
| KB018 | 1190-1202 | 1489.7  | <a href="#">KTPDELQTAVEEM</a>        |       |       |
| KB021 | 1190-1202 | 1489.7  | <a href="#">KTPDELQTAVEEM</a>        |       |       |
| KB006 | 1191-1203 | 1489.7  | <a href="#">TPDELQTAVEEMK</a>        |       |       |
| KB013 | 1191-1203 | 1489.7  | <a href="#">TPDELQTAVEEMK</a>        |       |       |
| KB003 | 1191-1204 | 1645.8  | <a href="#">TPDELQTAVEEMKR</a>       |       |       |
| KB006 | 1191-1204 | 1645.8  | <a href="#">TPDELQTAVEEMKR</a>       |       |       |
| KB013 | 1191-1204 | 1645.8  | <a href="#">TPDELQTAVEEMKR</a>       |       |       |
| KB005 | 1222-1236 | 1519.76 | <a href="#">TVNSVIAHAPPSAQE</a>      |       |       |
| KB007 | 1222-1236 | 1519.76 | <a href="#">TVNSVIAHAPPSAQE</a>      |       |       |
| KB017 | 1225-1238 | 1389.73 | <a href="#">SVIAHAPPSAQEAL</a>       |       |       |
| KB017 | 1239-1249 | 1338.7  | <a href="#">KKELETLTTNY</a>          |       |       |
| KB018 | 1239-1249 | 1338.7  | <a href="#">KKELETLTTNY</a>          |       |       |
| KB021 | 1275-1283 | 1137.58 | <a href="#">SYLEKANKW</a>            |       |       |

|       |           |         |                                           |  |  |
|-------|-----------|---------|-------------------------------------------|--|--|
| KB004 | 1280-1290 | 1342.72 | <a href="#">ANKWLNEVELK</a>               |  |  |
| KB003 | 1283-1290 | 1029.55 | <a href="#">WLNEVELK</a>                  |  |  |
| KB006 | 1283-1290 | 1029.55 | <a href="#">WLNEVELK</a>                  |  |  |
| KB008 | 1283-1290 | 1029.55 | <a href="#">WLNEVELK</a>                  |  |  |
| KB013 | 1283-1290 | 1029.55 | <a href="#">WLNEVELK</a>                  |  |  |
| KB017 | 1295-1308 | 1495.74 | <a href="#">ENVPAGPEEITEVL</a>            |  |  |
| KB004 | 1327-1352 | 2907.42 | <a href="#">LLAQLTDGGVMDELINEELETFNSR</a> |  |  |
| KB021 | 1329-1349 | 2324.07 | <a href="#">AQLTDGGVMDELINEELETF</a>      |  |  |
| KB004 | 1329-1352 | 2681.25 | <a href="#">AQLTDGGVMDELINEELETFNSR</a>   |  |  |
| KB021 | 1333-1349 | 1910.85 | <a href="#">TDGGVMDELINEELETF</a>         |  |  |
| KB006 | 1353-1362 | 1323.67 | <a href="#">WRELHEEAVR</a>                |  |  |
| KB006 | 1353-1363 | 1451.76 | <a href="#">WRELHEEAVRK</a>               |  |  |
| KB004 | 1364-1379 | 1871    | <a href="#">QKLEQSIQSAQEIEK</a>           |  |  |
| KB003 | 1366-1379 | 1614.85 | <a href="#">LLEQSIQSAQEIEK</a>            |  |  |
| KB004 | 1366-1379 | 1614.85 | <a href="#">LLEQSIQSAQEIEK</a>            |  |  |
| KB006 | 1366-1379 | 1614.85 | <a href="#">LLEQSIQSAQEIEK</a>            |  |  |
| KB017 | 1373-1381 | 1003.52 | <a href="#">SAQEIEKSL</a>                 |  |  |
| KB003 | 1380-1393 | 1670.89 | <a href="#">SLHLIQESLEFIDK</a>            |  |  |
| KB018 | 1389-1398 | 1196.61 | <a href="#">EFIDKQLAAY</a>                |  |  |
| KB021 | 1389-1398 | 1196.61 | <a href="#">EFIDKQLAAY</a>                |  |  |
| KB012 | 1391-1398 | 920.5   | <a href="#">IDKQLAAY</a>                  |  |  |
| KB004 | 1394-1414 | 2318.16 | <a href="#">QLAAYITDKVDAAQMPQEAQK</a>     |  |  |
| KB012 | 1399-1410 | 1315.64 | <a href="#">ITDKVDAAQMPQ</a>              |  |  |
| KB017 | 1399-1410 | 1315.64 | <a href="#">ITDKVDAAQMPQ</a>              |  |  |
| KB018 | 1399-1410 | 1315.64 | <a href="#">ITDKVDAAQMPQ</a>              |  |  |
| KB021 | 1399-1410 | 1315.64 | <a href="#">ITDKVDAAQMPQ</a>              |  |  |
| KB017 | 1399-1413 | 1643.78 | <a href="#">ITDKVDAAQMPQEAQ</a>           |  |  |
| KB018 | 1399-1413 | 1643.78 | <a href="#">ITDKVDAAQMPQEAQ</a>           |  |  |
| KB021 | 1399-1416 | 2013.02 | <a href="#">ITDKVDAAQMPQEAQKIQ</a>        |  |  |
| KB018 | 1399-1419 | 2328.16 | <a href="#">ITDKVDAAQMPQEAQKIQSDL</a>     |  |  |
| KB021 | 1399-1419 | 2328.16 | <a href="#">ITDKVDAAQMPQEAQKIQSDL</a>     |  |  |
| KB003 | 1415-1430 | 1858.9  | <a href="#">IQSDLTSHEISLEEMK</a>          |  |  |
| KB004 | 1415-1430 | 1858.9  | <a href="#">IQSDLTSHEISLEEMK</a>          |  |  |



|       |           |         |                                    |  |  |
|-------|-----------|---------|------------------------------------|--|--|
| KB006 | 1415-1430 | 1858.9  | <a href="#">IQSDLTSHEISLEEMK</a>   |  |  |
| KB003 | 1415-1431 | 1986.99 | <a href="#">IQSDLTSHEISLEEMKK</a>  |  |  |
| KB004 | 1415-1431 | 1986.99 | <a href="#">IQSDLTSHEISLEEMKK</a>  |  |  |
| KB006 | 1415-1431 | 1986.99 | <a href="#">IQSDLTSHEISLEEMKK</a>  |  |  |
| KB004 | 1416-1431 | 1873.91 | <a href="#">QSDLTSHEISLEEMKK</a>   |  |  |
| KB003 | 1442-1451 | 1099.62 | <a href="#">VLSQIDVAQK</a>         |  |  |
| KB006 | 1442-1451 | 1099.62 | <a href="#">VLSQIDVAQK</a>         |  |  |
| KB008 | 1442-1451 | 1099.62 | <a href="#">VLSQIDVAQK</a>         |  |  |
| KB013 | 1442-1451 | 1099.62 | <a href="#">VLSQIDVAQK</a>         |  |  |
| KB017 | 1444-1453 | 1128.65 | <a href="#">SQIDVAQKKL</a>         |  |  |
| KB017 | 1452-1460 | 1094.58 | <a href="#">KLQDVSMKF</a>          |  |  |
| KB018 | 1452-1460 | 1094.58 | <a href="#">KLQDVSMKF</a>          |  |  |
| KB021 | 1452-1460 | 1094.58 | <a href="#">KLQDVSMKF</a>          |  |  |
| KB004 | 1462-1472 | 1376.72 | <a href="#">LFQKPANFEQR</a>        |  |  |
| KB006 | 1462-1472 | 1376.72 | <a href="#">LFQKPANFEQR</a>        |  |  |
| KB013 | 1462-1472 | 1376.72 | <a href="#">LFQKPANFEQR</a>        |  |  |
| KB004 | 1463-1472 | 1263.64 | <a href="#">FQKPANFEQR</a>         |  |  |
| KB004 | 1473-1484 | 1432.75 | <a href="#">LEESKMILDEVK</a>       |  |  |
| KB006 | 1473-1484 | 1432.75 | <a href="#">LEESKMILDEVK</a>       |  |  |
| KB003 | 1478-1484 | 846.45  | <a href="#">MILDEVK</a>            |  |  |
| KB006 | 1478-1484 | 846.45  | <a href="#">MILDEVK</a>            |  |  |
| KB013 | 1478-1484 | 846.45  | <a href="#">MILDEVK</a>            |  |  |
| KB017 | 1512-1523 | 1364.69 | <a href="#">KSLSEVKSEVEM</a>       |  |  |
| KB018 | 1512-1523 | 1364.69 | <a href="#">KSLSEVKSEVEM</a>       |  |  |
| KB003 | 1519-1526 | 933.48  | <a href="#">SEVEMVIK</a>           |  |  |
| KB006 | 1519-1526 | 933.48  | <a href="#">SEVEMVIK</a>           |  |  |
| KB013 | 1519-1526 | 933.48  | <a href="#">SEVEMVIK</a>           |  |  |
| KB017 | 1534-1550 | 1998.07 | <a href="#">KKQTENPKELDERVTAL</a>  |  |  |
| KB017 | 1551-1557 | 915.48  | <a href="#">KLHYNEL</a>            |  |  |
| KB021 | 1579-1588 | 1304.65 | <a href="#">RKEMNVLTEW</a>         |  |  |
| KB004 | 1580-1598 | 2192.1  | <a href="#">KEMNVLTEWLAATDELTK</a> |  |  |
| KB004 | 1581-1598 | 2064.01 | <a href="#">EMNVLTEWLAATDELTK</a>  |  |  |
| KB004 | 1581-1599 | 2220.11 | <a href="#">EMNVLTEWLAATDELTKR</a> |  |  |

|       |           |         |                                     |  |  |
|-------|-----------|---------|-------------------------------------|--|--|
| KB021 | 1589-1607 | 1975.99 | <a href="#">LAATDELTKRSAVEGMPS</a>  |  |  |
| KB021 | 1597-1615 | 2075.99 | <a href="#">TKRSAVEGMPSNLDSEVAW</a> |  |  |
| KB021 | 1599-1615 | 1846.85 | <a href="#">RSAVEGMPSNLDSEVAW</a>   |  |  |
| KB021 | 1600-1615 | 1690.75 | <a href="#">SAVEGMPSNLDSEVAW</a>    |  |  |
| KB003 | 1600-1617 | 1875.87 | <a href="#">SAVEGMPSNLDSEVAWGK</a>  |  |  |
| KB006 | 1600-1617 | 1875.87 | <a href="#">SAVEGMPSNLDSEVAWGK</a>  |  |  |
| KB021 | 1616-1630 | 1707.96 | <a href="#">GKATQKEIEKQKAHL</a>     |  |  |
| KB017 | 1630-1640 | 1174.64 | <a href="#">LKSVELGESL</a>          |  |  |
| KB017 | 1631-1640 | 1061.56 | <a href="#">KSVTELGESL</a>          |  |  |
| KB003 | 1632-1641 | 1061.56 | <a href="#">SVTELGESLK</a>          |  |  |
| KB006 | 1632-1641 | 1061.56 | <a href="#">SVTELGESLK</a>          |  |  |
| KB008 | 1632-1641 | 1061.56 | <a href="#">SVTELGESLK</a>          |  |  |
| KB013 | 1632-1641 | 1061.56 | <a href="#">SVTELGESLK</a>          |  |  |
| KB017 | 1643-1655 | 1470.87 | <a href="#">VLGKKETLVEDKL</a>       |  |  |
| KB017 | 1645-1655 | 1258.71 | <a href="#">GKKETLVEDKL</a>         |  |  |
| KB021 | 1663-1672 | 1188.61 | <a href="#">IAVTSRVEEW</a>          |  |  |
| KB004 | 1682-1695 | 1732.81 | <a href="#">HMETFDQNIQITK</a>       |  |  |
| KB017 | 1687-1696 | 1273.63 | <a href="#">DQNIQITKW</a>           |  |  |
| KB018 | 1687-1696 | 1273.63 | <a href="#">DQNIQITKW</a>           |  |  |
| KB021 | 1687-1696 | 1273.63 | <a href="#">DQNIQITKW</a>           |  |  |
| KB003 | 1696-1709 | 1696.83 | <a href="#">WIIHADELLDESEK</a>      |  |  |
| KB004 | 1697-1709 | 1510.75 | <a href="#">IIHADELLDESEK</a>       |  |  |
| KB004 | 1753-1764 | 1410.78 | <a href="#">KVVEPQISELNR</a>        |  |  |
| KB006 | 1753-1764 | 1410.78 | <a href="#">KVVEPQISELNR</a>        |  |  |
| KB004 | 1753-1765 | 1566.88 | <a href="#">KVVEPQISELNRR</a>       |  |  |
| KB003 | 1754-1764 | 1282.69 | <a href="#">VVEPQISELNR</a>         |  |  |
| KB006 | 1754-1764 | 1282.69 | <a href="#">VVEPQISELNR</a>         |  |  |
| KB013 | 1754-1764 | 1282.69 | <a href="#">VVEPQISELNR</a>         |  |  |
| KB004 | 1778-1794 | 1959.03 | <a href="#">ASIPLKELEQFNSDIQK</a>   |  |  |
| KB004 | 1781-1794 | 1687.88 | <a href="#">PLKELEQFNSDIQK</a>      |  |  |
| KB003 | 1784-1794 | 1349.65 | <a href="#">ELEQFNSDIQK</a>         |  |  |
| KB004 | 1784-1794 | 1349.65 | <a href="#">ELEQFNSDIQK</a>         |  |  |
| KB006 | 1784-1794 | 1349.65 | <a href="#">ELEQFNSDIQK</a>         |  |  |

|       |           |         |                                            |  |  |
|-------|-----------|---------|--------------------------------------------|--|--|
| KB013 | 1784-1794 | 1349.65 | <a href="#">ELEQFNSDIQK</a>                |  |  |
| KB004 | 1795-1804 | 1153.62 | <a href="#">LLEPLEAEIQ</a>                 |  |  |
| KB004 | 1795-1808 | 1551.81 | <a href="#">LLEPLEAEIQQGVN</a>             |  |  |
| KB004 | 1795-1810 | 1792.99 | <a href="#">LLEPLEAEIQQGVNLK</a>           |  |  |
| KB007 | 1803-1828 | 2981.32 | <a href="#">IQQGVNLKEEDFNKDMSEDNEGTVNE</a> |  |  |
| KB004 | 1811-1832 | 2611.13 | <a href="#">EEDFNKDMSEDNEGTVNELLQR</a>     |  |  |
| KB006 | 1811-1832 | 2611.13 | <a href="#">EEDFNKDMSEDNEGTVNELLQR</a>     |  |  |
| KB004 | 1817-1832 | 1848.82 | <a href="#">DMSSEDNEGTVNELLQR</a>          |  |  |
| KB006 | 1817-1832 | 1848.82 | <a href="#">DMSSEDNEGTVNELLQR</a>          |  |  |
| KB021 | 1874-1882 | 1145.55 | <a href="#">ALEISHQWY</a>                  |  |  |
| KB004 | 1874-1885 | 1564.77 | <a href="#">ALEISHQWYQYK</a>               |  |  |
| KB004 | 1876-1885 | 1380.65 | <a href="#">EISHQWYQYK</a>                 |  |  |
| KB006 | 1901-1909 | 1009.59 | <a href="#">KLASLPEPR</a>                  |  |  |
| KB004 | 1913-1923 | 1398.82 | <a href="#">KLKEIDRELQK</a>                |  |  |
| KB006 | 1913-1923 | 1398.82 | <a href="#">KLKEIDRELQK</a>                |  |  |
| KB013 | 1914-1923 | 1270.72 | <a href="#">LKEIDRELQK</a>                 |  |  |
| KB003 | 1934-1956 | 2371.17 | <a href="#">QAEGLSENGAAMAVEPTQIQLSK</a>    |  |  |
| KB004 | 1934-1956 | 2371.17 | <a href="#">QAEGLSENGAAMAVEPTQIQLSK</a>    |  |  |
| KB006 | 1934-1956 | 2371.17 | <a href="#">QAEGLSENGAAMAVEPTQIQLSK</a>    |  |  |
| KB004 | 1934-1957 | 2527.27 | <a href="#">QAEGLSENGAAMAVEPTQIQLSKR</a>   |  |  |
| KB004 | 1946-1956 | 1212.67 | <a href="#">AVEPTQIQLSK</a>                |  |  |
| KB017 | 1959-1968 | 1238.6  | <a href="#">RQIESNFAQF</a>                 |  |  |
| KB018 | 1959-1968 | 1238.6  | <a href="#">RQIESNFAQF</a>                 |  |  |
| KB021 | 1959-1968 | 1238.6  | <a href="#">RQIESNFAQF</a>                 |  |  |
| KB003 | 1960-1969 | 1238.6  | <a href="#">QIESNFAQFR</a>                 |  |  |
| KB004 | 1960-1969 | 1238.6  | <a href="#">QIESNFAQFR</a>                 |  |  |
| KB006 | 1960-1969 | 1238.6  | <a href="#">QIESNFAQFR</a>                 |  |  |
| KB013 | 1960-1969 | 1238.6  | <a href="#">QIESNFAQFR</a>                 |  |  |
| KB021 | 1980-1997 | 2094.91 | <a href="#">HEETMVVTTEDMPLDVSY</a>         |  |  |
| KB005 | 1990-2005 | 1828.84 | <a href="#">DMPLDVSYVPSTYLTE</a>           |  |  |
| KB021 | 2003-2010 | 924.53  | <a href="#">LTEISHIL</a>                   |  |  |
| KB005 | 2006-2015 | 1109.61 | <a href="#">ISHILQALSE</a>                 |  |  |
| KB017 | 2011-2020 | 1123.59 | <a href="#">QALSEVDHLL</a>                 |  |  |

|       |           |         |                                  |  |  |
|-------|-----------|---------|----------------------------------|--|--|
| KB003 | 2029-2035 | 912.42  | <a href="#">DFEDLFK</a>          |  |  |
| KB013 | 2029-2035 | 912.42  | <a href="#">DFEDLFK</a>          |  |  |
| KB003 | 2029-2041 | 1626.78 | <a href="#">DFEDLFKQEESLK</a>    |  |  |
| KB004 | 2029-2041 | 1626.78 | <a href="#">DFEDLFKQEESLK</a>    |  |  |
| KB006 | 2029-2041 | 1626.78 | <a href="#">DFEDLFKQEESLK</a>    |  |  |
| KB004 | 2032-2041 | 1235.64 | <a href="#">DLFKQEESLK</a>       |  |  |
| KB004 | 2042-2053 | 1384.74 | <a href="#">NIKDNLQQISGR</a>     |  |  |
| KB006 | 2042-2053 | 1384.74 | <a href="#">NIKDNLQQISGR</a>     |  |  |
| KB003 | 2062-2073 | 1236.6  | <a href="#">TAALQSATSMEK</a>     |  |  |
| KB006 | 2074-2089 | 1805.9  | <a href="#">VKVQEAVAQMDFQGEK</a> |  |  |
| KB013 | 2074-2089 | 1805.9  | <a href="#">VKVQEAVAQMDFQGEK</a> |  |  |
| KB003 | 2076-2089 | 1578.73 | <a href="#">VQEAVAQMDFQGEK</a>   |  |  |
| KB006 | 2076-2089 | 1578.73 | <a href="#">VQEAVAQMDFQGEK</a>   |  |  |
| KB008 | 2076-2089 | 1578.73 | <a href="#">VQEAVAQMDFQGEK</a>   |  |  |
| KB013 | 2076-2089 | 1578.73 | <a href="#">VQEAVAQMDFQGEK</a>   |  |  |
| KB013 | 2110-2116 | 976.42  | <a href="#">HFHYDMK</a>          |  |  |
| KB021 | 2112-2118 | 938.43  | <a href="#">HYDMKVF</a>          |  |  |
| KB021 | 2119-2128 | 1305.6  | <a href="#">NQWLNEVEQF</a>       |  |  |
| KB017 | 2122-2129 | 1024.49 | <a href="#">LNEVEQFF</a>         |  |  |
| KB018 | 2122-2129 | 1024.49 | <a href="#">LNEVEQFF</a>         |  |  |
| KB021 | 2122-2129 | 1024.49 | <a href="#">LNEVEQFF</a>         |  |  |
| KB017 | 2130-2143 | 1771.86 | <a href="#">KKTQNPENWEHAKY</a>   |  |  |
| KB018 | 2130-2143 | 1771.86 | <a href="#">KKTQNPENWEHAKY</a>   |  |  |
| KB021 | 2130-2143 | 1771.86 | <a href="#">KKTQNPENWEHAKY</a>   |  |  |
| KB003 | 2132-2142 | 1352.61 | <a href="#">TQNPENWEHAK</a>      |  |  |
| KB018 | 2146-2156 | 1262.65 | <a href="#">YLKELQDGIGQ</a>      |  |  |
| KB021 | 2146-2156 | 1262.65 | <a href="#">YLKELQDGIGQ</a>      |  |  |
| KB017 | 2146-2158 | 1546.81 | <a href="#">YLKELQDGIGQRQ</a>    |  |  |
| KB021 | 2146-2158 | 1546.81 | <a href="#">YLKELQDGIGQRQ</a>    |  |  |
| KB018 | 2147-2156 | 1099.59 | <a href="#">LKELQDGIGQ</a>       |  |  |
| KB021 | 2147-2156 | 1099.59 | <a href="#">LKELQDGIGQ</a>       |  |  |
| KB017 | 2147-2158 | 1383.75 | <a href="#">LKELQDGIGQRQ</a>     |  |  |
| KB018 | 2147-2158 | 1383.75 | <a href="#">LKELQDGIGQRQ</a>     |  |  |

|       |           |         |                                            |  |  |
|-------|-----------|---------|--------------------------------------------|--|--|
| KB021 | 2147-2161 | 1652.92 | <a href="#">LKEIQDGIGQRQAVV</a>            |  |  |
| KB021 | 2147-2162 | 1809.02 | <a href="#">LKEIQDGIGQRQAVVR</a>           |  |  |
| KB003 | 2163-2177 | 1617.82 | <a href="#">TLNATGEEIIQQSSK</a>            |  |  |
| KB006 | 2163-2177 | 1617.82 | <a href="#">TLNATGEEIIQQSSK</a>            |  |  |
| KB008 | 2163-2177 | 1617.82 | <a href="#">TLNATGEEIIQQSSK</a>            |  |  |
| KB013 | 2163-2177 | 1617.82 | <a href="#">TLNATGEEIIQQSSK</a>            |  |  |
| KB017 | 2165-2181 | 1832.88 | <a href="#">NATGEEIIQQSSKTDVN</a>          |  |  |
| KB003 | 2178-2186 | 1058.56 | <a href="#">TDVNILQEK</a>                  |  |  |
| KB006 | 2178-2186 | 1058.56 | <a href="#">TDVNILQEK</a>                  |  |  |
| KB008 | 2178-2186 | 1058.56 | <a href="#">TDVNILQEK</a>                  |  |  |
| KB013 | 2178-2186 | 1058.56 | <a href="#">TDVNILQEK</a>                  |  |  |
| KB004 | 2208-2220 | 1618.83 | <a href="#">IEEQKNVLSEFQR</a>              |  |  |
| KB006 | 2208-2220 | 1618.83 | <a href="#">IEEQKNVLSEFQR</a>              |  |  |
| KB003 | 2213-2220 | 991.51  | <a href="#">NVLSEFQR</a>                   |  |  |
| KB004 | 2213-2220 | 991.51  | <a href="#">NVLSEFQR</a>                   |  |  |
| KB006 | 2213-2220 | 991.51  | <a href="#">NVLSEFQR</a>                   |  |  |
| KB013 | 2213-2220 | 991.51  | <a href="#">NVLSEFQR</a>                   |  |  |
| KB017 | 2216-2225 | 1283.58 | <a href="#">SEFQRDLNEF</a>                 |  |  |
| KB005 | 2232-2251 | 2224.12 | <a href="#">ADNIAITPLGDEEQLKEQLE</a>       |  |  |
| KB007 | 2232-2251 | 2224.12 | <a href="#">ADNIAITPLGDEEQLKEQLE</a>       |  |  |
| KB017 | 2247-2255 | 1113.64 | <a href="#">KEQLEQVKL</a>                  |  |  |
| KB003 | 2255-2263 | 1052.62 | <a href="#">LLAEELPLR</a>                  |  |  |
| KB004 | 2255-2263 | 1052.62 | <a href="#">LLAEELPLR</a>                  |  |  |
| KB006 | 2255-2263 | 1052.62 | <a href="#">LLAEELPLR</a>                  |  |  |
| KB008 | 2255-2263 | 1052.62 | <a href="#">LLAEELPLR</a>                  |  |  |
| KB013 | 2255-2263 | 1052.62 | <a href="#">LLAEELPLR</a>                  |  |  |
| KB004 | 2256-2263 | 939.54  | <a href="#">LAEELPLR</a>                   |  |  |
| KB017 | 2256-2267 | 1350.79 | <a href="#">LAEELPLRQGIL</a>               |  |  |
| KB012 | 2268-2278 | 1128.61 | <a href="#">KQLNETGGAVL</a>                |  |  |
| KB017 | 2268-2278 | 1128.61 | <a href="#">KQLNETGGAVL</a>                |  |  |
| KB004 | 2269-2290 | 2350.21 | <a href="#">QLNETGGAVLVSAPIRPEEQDK</a>     |  |  |
| KB004 | 2269-2293 | 2720.43 | <a href="#">QLNETGGAVLVSAPIRPEEQDKLEK</a>  |  |  |
| KB004 | 2269-2294 | 2848.53 | <a href="#">QLNETGGAVLVSAPIRPEEQDKLEKK</a> |  |  |

|       |           |         |                                          |  |  |
|-------|-----------|---------|------------------------------------------|--|--|
| KB005 | 2273-2292 | 2108.11 | <a href="#">TGGAVLVSAPIRPEEQDKLE</a>     |  |  |
| KB021 | 2296-2302 | 916.48  | <a href="#">KQTNLQW</a>                  |  |  |
| KB003 | 2297-2304 | 1029.56 | <a href="#">QTNLQWIK</a>                 |  |  |
| KB021 | 2303-2316 | 1566.91 | <a href="#">IKVSRALPEKQGEL</a>           |  |  |
| KB017 | 2307-2319 | 1504.8  | <a href="#">RALPEKQGELEVH</a>            |  |  |
| KB004 | 2308-2321 | 1589.88 | <a href="#">ALPEKQGELEVHLK</a>           |  |  |
| KB004 | 2310-2321 | 1405.76 | <a href="#">PEKQGELEVHLK</a>             |  |  |
| KB021 | 2324-2333 | 1279.65 | <a href="#">RQLEEQLDHL</a>               |  |  |
| KB021 | 2337-2347 | 1344.74 | <a href="#">LSPIRNQLIY</a>               |  |  |
| KB003 | 2342-2359 | 2061.02 | <a href="#">NQLEIYNQPSQAGPFDIK</a>       |  |  |
| KB004 | 2342-2359 | 2061.02 | <a href="#">NQLEIYNQPSQAGPFDIK</a>       |  |  |
| KB005 | 2346-2360 | 1705.83 | <a href="#">YNQPSQAGPFDIKE</a>           |  |  |
| KB017 | 2348-2356 | 944.44  | <a href="#">NQPSQAGPF</a>                |  |  |
| KB021 | 2357-2366 | 1181.63 | <a href="#">DIKEIEVTVH</a>               |  |  |
| KB017 | 2367-2376 | 1127.63 | <a href="#">GKQADVERLL</a>               |  |  |
| KB018 | 2395-2403 | 1174.6  | <a href="#">KLEDLRSEW</a>                |  |  |
| KB003 | 2401-2411 | 1352.68 | <a href="#">SEWEAVNHLLR</a>              |  |  |
| KB021 | 2404-2413 | 1192.66 | <a href="#">EAVNHLLREL</a>               |  |  |
| KB004 | 2421-2445 | 2403.29 | <a href="#">APGLSTTGASASQTVTLVTQSVTK</a> |  |  |
| KB017 | 2438-2452 | 1630.95 | <a href="#">VTQSVVKETVISKL</a>           |  |  |
| KB004 | 2452-2470 | 2114.11 | <a href="#">LEMPSSLLLEVPALADFN</a>       |  |  |
| KB021 | 2459-2468 | 1086.6  | <a href="#">LLEVPALADF</a>               |  |  |
| KB021 | 2460-2472 | 1500.77 | <a href="#">LEVPALADFNRAW</a>            |  |  |
| KB017 | 2480-2487 | 942.59  | <a href="#">SLLDRVIK</a>                 |  |  |
| KB017 | 2488-2502 | 1734.79 | <a href="#">SQRVMVGDLEDINEM</a>          |  |  |
| KB003 | 2491-2505 | 1717.86 | <a href="#">VMVGDLEDINEMIIK</a>          |  |  |
| KB006 | 2491-2505 | 1717.86 | <a href="#">VMVGDLEDINEMIIK</a>          |  |  |
| KB006 | 2506-2516 | 1328.7  | <a href="#">QKATLQDLEQR</a>              |  |  |
| KB013 | 2506-2516 | 1328.7  | <a href="#">QKATLQDLEQR</a>              |  |  |
| KB003 | 2508-2516 | 1072.55 | <a href="#">ATLQDLEQR</a>                |  |  |
| KB004 | 2508-2516 | 1072.55 | <a href="#">ATLQDLEQR</a>                |  |  |
| KB006 | 2508-2516 | 1072.55 | <a href="#">ATLQDLEQR</a>                |  |  |
| KB008 | 2508-2516 | 1072.55 | <a href="#">ATLQDLEQR</a>                |  |  |

|       |           |         |                                       |      |       |
|-------|-----------|---------|---------------------------------------|------|-------|
| KB013 | 2508-2516 | 1072.55 | <a href="#">ATLQDLEQR</a>             |      |       |
| KB004 | 2517-2519 | 399.22  | <a href="#">RPQ</a>                   |      |       |
| KB004 | 2550-2564 | 1925.96 | <a href="#">IQIQWDEVQEQLQNR</a>       |      |       |
| KB006 | 2565-2573 | 1158.62 | <a href="#">RQQLNEMLK</a>             |      |       |
| KB006 | 2566-2573 | 1002.52 | <a href="#">QQLNEMLK</a>              |      |       |
| KB013 | 2566-2573 | 1002.52 | <a href="#">QQLNEMLK</a>              |      |       |
| KB017 | 2569-2578 | 1250.56 | <a href="#">NEMLKDSTQW</a>            |      |       |
| KB018 | 2569-2578 | 1250.56 | <a href="#">NEMLKDSTQW</a>            |      |       |
| KB021 | 2569-2578 | 1250.56 | <a href="#">NEMLKDSTQW</a>            |      |       |
| KB017 | 2570-2578 | 1136.52 | <a href="#">EMLKDSTQW</a>             |      |       |
| KB018 | 2570-2578 | 1136.52 | <a href="#">EMLKDSTQW</a>             |      |       |
| KB021 | 2570-2578 | 1136.52 | <a href="#">EMLKDSTQW</a>             |      |       |
| KB003 | 2574-2582 | 1076.51 | <a href="#">DSTQWLEAK</a>             |      |       |
| KB004 | 2574-2582 | 1076.51 | <a href="#">DSTQWLEAK</a>             |      |       |
| KB006 | 2574-2582 | 1076.51 | <a href="#">DSTQWLEAK</a>             |      |       |
| KB013 | 2574-2582 | 1076.51 | <a href="#">DSTQWLEAK</a>             |      |       |
| KB004 | 2574-2593 | 2315.14 | <a href="#">DSTQWLEAKEEAEQVIGQR</a>   |      |       |
| KB017 | 2579-2591 | 1442.73 | <a href="#">LEAKEEAEQVIGQ</a>         |      |       |
| KB021 | 2579-2591 | 1442.73 | <a href="#">LEAKEEAEQVIGQ</a>         |      |       |
| KB003 | 2583-2593 | 1256.64 | <a href="#">EEAEQVIGQVR</a>           |      |       |
| KB004 | 2583-2593 | 1256.64 | <a href="#">EEAEQVIGQVR</a>           |      |       |
| KB006 | 2583-2593 | 1256.64 | <a href="#">EEAEQVIGQVR</a>           |      |       |
| KB013 | 2583-2593 | 1256.64 | <a href="#">EEAEQVIGQVR</a>           |      |       |
| KB003 | 2627-2639 | 1384.76 | <a href="#">QISVDVANDLALK</a>         |      |       |
| KB004 | 2627-2639 | 1384.76 | <a href="#">QISVDVANDLALK</a>         |      |       |
| KB006 | 2627-2639 | 1384.76 | <a href="#">QISVDVANDLALK</a>         |      |       |
| KB005 | 2640-2661 | 2604.3  | <a href="#">LLRDYSADDTRKVMITENINT</a> | DDpT | T2649 |
| KB013 | 2669-2682 | 1653.81 | <a href="#">RVSEQEAALEETHR</a>        |      |       |
| KB003 | 2670-2682 | 1497.71 | <a href="#">VSEQEAALEETHR</a>         |      |       |
| KB006 | 2670-2682 | 1497.71 | <a href="#">VSEQEAALEETHR</a>         |      |       |
| KB008 | 2670-2682 | 1497.71 | <a href="#">VSEQEAALEETHR</a>         |      |       |
| KB003 | 2683-2693 | 1342.75 | <a href="#">LLQQFPLDLEK</a>           |      |       |
| KB004 | 2683-2693 | 1342.75 | <a href="#">LLQQFPLDLEK</a>           |      |       |

|       |           |         |                                        |  |  |
|-------|-----------|---------|----------------------------------------|--|--|
| KB017 | 2685-2694 | 1263.65 | <a href="#">QQFPLDLEKF</a>             |  |  |
| KB018 | 2685-2694 | 1263.65 | <a href="#">QQFPLDLEKF</a>             |  |  |
| KB021 | 2685-2694 | 1263.65 | <a href="#">QQFPLDLEKF</a>             |  |  |
| KB021 | 2695-2706 | 1334.64 | <a href="#">LSWITEAETTAN</a>           |  |  |
| KB021 | 2695-2708 | 1546.79 | <a href="#">LSWITEAETTANVL</a>         |  |  |
| KB012 | 2698-2708 | 1160.59 | <a href="#">ITEAETTANVL</a>            |  |  |
| KB021 | 2698-2708 | 1160.59 | <a href="#">ITEAETTANVL</a>            |  |  |
| KB005 | 2701-2715 | 1631.81 | <a href="#">AETTANVLQDASRKE</a>        |  |  |
| KB005 | 2727-2737 | 1343.65 | <a href="#">LMKPWQDLQGE</a>            |  |  |
| KB005 | 2727-2739 | 1585.78 | <a href="#">LMKPWQDLQGEIE</a>          |  |  |
| KB007 | 2727-2739 | 1585.78 | <a href="#">LMKPWQDLQGEIE</a>          |  |  |
| KB012 | 2746-2756 | 1279.65 | <a href="#">HNLDENGQKIL</a>            |  |  |
| KB017 | 2746-2756 | 1279.65 | <a href="#">HNLDENGQKIL</a>            |  |  |
| KB018 | 2746-2756 | 1279.65 | <a href="#">HNLDENGQKIL</a>            |  |  |
| KB021 | 2746-2756 | 1279.65 | <a href="#">HNLDENGQKIL</a>            |  |  |
| KB003 | 2758-2770 | 1413.71 | <a href="#">SLEGSDEAPLLQR</a>          |  |  |
| KB006 | 2758-2770 | 1413.71 | <a href="#">SLEGSDEAPLLQR</a>          |  |  |
| KB008 | 2758-2770 | 1413.71 | <a href="#">SLEGSDEAPLLQR</a>          |  |  |
| KB013 | 2758-2770 | 1413.71 | <a href="#">SLEGSDEAPLLQR</a>          |  |  |
| KB004 | 2760-2770 | 1213.59 | <a href="#">EGSDEAPLLQR</a>            |  |  |
| KB021 | 276-287   | 1293.66 | <a href="#">SQQITVSLAQQY</a>           |  |  |
| KB006 | 2771-2778 | 1036.51 | <a href="#">RLDNMNFK</a>               |  |  |
| KB021 | 2788-2800 | 1541.72 | <a href="#">NIRSHLEASSDQW</a>          |  |  |
| KB021 | 2814-2835 | 2396.23 | <a href="#">LQLKDDELSRQAPIGGDFPAVQ</a> |  |  |
| KB017 | 2822-2835 | 1441.73 | <a href="#">SRQAPIGGDFPAVQ</a>         |  |  |
| KB003 | 2824-2836 | 1326.69 | <a href="#">QAPIGGDFPAVQK</a>          |  |  |
| KB004 | 2824-2836 | 1326.69 | <a href="#">QAPIGGDFPAVQK</a>          |  |  |
| KB006 | 2824-2836 | 1326.69 | <a href="#">QAPIGGDFPAVQK</a>          |  |  |
| KB008 | 2824-2836 | 1326.69 | <a href="#">QAPIGGDFPAVQK</a>          |  |  |
| KB013 | 2824-2836 | 1326.69 | <a href="#">QAPIGGDFPAVQK</a>          |  |  |
| KB004 | 2826-2836 | 1127.6  | <a href="#">PIGGDFPAVQK</a>            |  |  |
| KB005 | 2848-2860 | 1487.83 | <a href="#">LKTKEPVIMSTLE</a>          |  |  |
| KB007 | 2848-2860 | 1487.83 | <a href="#">LKTKEPVIMSTLE</a>          |  |  |



|       |           |         |                                    |  |  |
|-------|-----------|---------|------------------------------------|--|--|
| KB003 | 2850-2863 | 1602.87 | <a href="#">TKEPVIMSTLETVR</a>     |  |  |
| KB006 | 2850-2863 | 1602.87 | <a href="#">TKEPVIMSTLETVR</a>     |  |  |
| KB004 | 2852-2863 | 1373.72 | <a href="#">EPVIMSTLETVR</a>       |  |  |
| KB006 | 2852-2863 | 1373.72 | <a href="#">EPVIMSTLETVR</a>       |  |  |
| KB017 | 2857-2865 | 1064.59 | <a href="#">STLETVRIF</a>          |  |  |
| KB003 | 2864-2876 | 1515.82 | <a href="#">IFLTEQPLEGLEK</a>      |  |  |
| KB004 | 2864-2876 | 1515.82 | <a href="#">IFLTEQPLEGLEK</a>      |  |  |
| KB006 | 2864-2876 | 1515.82 | <a href="#">IFLTEQPLEGLEK</a>      |  |  |
| KB017 | 2866-2877 | 1368.75 | <a href="#">LTEQPLEGLEKL</a>       |  |  |
| KB021 | 2866-2877 | 1368.75 | <a href="#">LTEQPLEGLEKL</a>       |  |  |
| KB017 | 2866-2878 | 1531.81 | <a href="#">LTEQPLEGLEKLY</a>      |  |  |
| KB018 | 2866-2878 | 1531.81 | <a href="#">LTEQPLEGLEKLY</a>      |  |  |
| KB021 | 2866-2878 | 1531.81 | <a href="#">LTEQPLEGLEKLY</a>      |  |  |
| KB017 | 2879-2894 | 1891.94 | <a href="#">QEPRELPPEERAQNV</a>    |  |  |
| KB018 | 2879-2894 | 1891.94 | <a href="#">QEPRELPPEERAQNV</a>    |  |  |
| KB021 | 2879-2896 | 2161.12 | <a href="#">QEPRELPPEERAQNVTRL</a> |  |  |
| KB021 | 2897-2908 | 1471.74 | <a href="#">LRKQAEVNAEW</a>        |  |  |
| KB004 | 2899-2914 | 1941.99 | <a href="#">KQAEVNAEWDKLNLR</a>    |  |  |
| KB003 | 2900-2914 | 1813.9  | <a href="#">QAEVNAEWDKLNLR</a>     |  |  |
| KB004 | 2900-2914 | 1813.9  | <a href="#">QAEVNAEWDKLNLR</a>     |  |  |
| KB006 | 2900-2914 | 1813.9  | <a href="#">QAEVNAEWDKLNLR</a>     |  |  |
| KB004 | 2901-2914 | 1685.84 | <a href="#">AEVNAEWDKLNLR</a>      |  |  |
| KB004 | 2902-2914 | 1614.8  | <a href="#">EEVNAEWDKLNLR</a>      |  |  |
| KB017 | 2912-2918 | 860.41  | <a href="#">NLRADW</a>             |  |  |
| KB003 | 2929-2942 | 1613.81 | <a href="#">LQELQEADELK</a>        |  |  |
| KB004 | 2929-2942 | 1613.81 | <a href="#">LQELQEADELK</a>        |  |  |
| KB006 | 2929-2942 | 1613.81 | <a href="#">LQELQEADELK</a>        |  |  |
| KB004 | 2929-2944 | 1883    | <a href="#">LQELQEADELKLR</a>      |  |  |
| KB004 | 2973-2987 | 1678.95 | <a href="#">ALRGEIAPLKENVNR</a>    |  |  |
| KB003 | 2976-2987 | 1338.73 | <a href="#">GEIAPLKENVNR</a>       |  |  |
| KB006 | 2976-2987 | 1338.73 | <a href="#">GEIAPLKENVNR</a>       |  |  |
| KB004 | 3006-3016 | 1274.65 | <a href="#">NLSTLEDLNTR</a>        |  |  |
| KB021 | 3006-3017 | 1460.73 | <a href="#">NLSTLEDLNTRW</a>       |  |  |

|       |           |         |                                    |  |  |
|-------|-----------|---------|------------------------------------|--|--|
| KB003 | 3019-3027 | 1041.58 | <a href="#">LLQVAVEDR</a>          |  |  |
| KB004 | 3019-3027 | 1041.58 | <a href="#">LLQVAVEDR</a>          |  |  |
| KB006 | 3019-3027 | 1041.58 | <a href="#">LLQVAVEDR</a>          |  |  |
| KB008 | 3019-3027 | 1041.58 | <a href="#">LLQVAVEDR</a>          |  |  |
| KB013 | 3019-3027 | 1041.58 | <a href="#">LLQVAVEDR</a>          |  |  |
| KB004 | 3020-3027 | 928.5   | <a href="#">LQVAVEDR</a>           |  |  |
| KB017 | 3033-3045 | 1497.67 | <a href="#">EAHRDFGPASQHF</a>      |  |  |
| KB018 | 3033-3045 | 1497.67 | <a href="#">EAHRDFGPASQHF</a>      |  |  |
| KB021 | 3033-3045 | 1497.67 | <a href="#">EAHRDFGPASQHF</a>      |  |  |
| KB017 | 3039-3046 | 855.42  | <a href="#">GPASQHFL</a>           |  |  |
| KB012 | 3055-3065 | 1272.68 | <a href="#">ERAISPNKVYPY</a>       |  |  |
| KB017 | 3055-3065 | 1272.68 | <a href="#">ERAISPNKVYPY</a>       |  |  |
| KB018 | 3055-3065 | 1272.68 | <a href="#">ERAISPNKVYPY</a>       |  |  |
| KB021 | 3055-3065 | 1272.68 | <a href="#">ERAISPNKVYPY</a>       |  |  |
| KB021 | 3077-3085 | 1132.52 | <a href="#">DHPKMTELY</a>          |  |  |
| KB004 | 3081-3095 | 1765.87 | <a href="#">MTELYQSLADLNNVR</a>    |  |  |
| KB021 | 3085-3096 | 1438.72 | <a href="#">YQSLADLNNVRF</a>       |  |  |
| KB017 | 3086-3096 | 1275.66 | <a href="#">QSLADLNNVRF</a>        |  |  |
| KB018 | 3086-3096 | 1275.66 | <a href="#">QSLADLNNVRF</a>        |  |  |
| KB021 | 3086-3096 | 1275.66 | <a href="#">QSLADLNNVRF</a>        |  |  |
| KB017 | 3089-3096 | 947.48  | <a href="#">ADLNNVRF</a>           |  |  |
| KB018 | 3089-3096 | 947.48  | <a href="#">ADLNNVRF</a>           |  |  |
| KB021 | 3089-3096 | 947.48  | <a href="#">ADLNNVRF</a>           |  |  |
| KB017 | 3132-3141 | 1200.58 | <a href="#">KQNDQPM DIL</a>        |  |  |
| KB021 | 3152-3166 | 1788.91 | <a href="#">DRLEQEHNNLVNVPL</a>    |  |  |
| KB003 | 3240-3257 | 1845.92 | <a href="#">QLGEVASFGGSNIEPSVR</a> |  |  |
| KB004 | 3240-3257 | 1845.92 | <a href="#">QLGEVASFGGSNIEPSVR</a> |  |  |
| KB006 | 3240-3257 | 1845.92 | <a href="#">QLGEVASFGGSNIEPSVR</a> |  |  |
| KB021 | 3261-3273 | 1443.74 | <a href="#">QFANNKPEIEAAL</a>      |  |  |
| KB021 | 3261-3274 | 1590.8  | <a href="#">QFANNKPEIEAALF</a>     |  |  |
| KB021 | 3263-3273 | 1168.61 | <a href="#">ANNKPEIEAAL</a>        |  |  |
| KB021 | 3263-3274 | 1315.68 | <a href="#">ANNKPEIEAALF</a>       |  |  |
| KB021 | 3275-3287 | 1689.8  | <a href="#">LDWMRLEPQSMVW</a>      |  |  |

|       |           |         |                                    |       |       |
|-------|-----------|---------|------------------------------------|-------|-------|
| KB017 | 3278-3287 | 1275.61 | <a href="#">MRLEPQSMVW</a>         |       |       |
| KB018 | 3278-3287 | 1275.61 | <a href="#">MRLEPQSMVW</a>         |       |       |
| KB021 | 3278-3287 | 1275.61 | <a href="#">MRLEPQSMVW</a>         |       |       |
| KB017 | 3279-3287 | 1144.57 | <a href="#">RLEPQSMVW</a>          |       |       |
| KB018 | 3279-3287 | 1144.57 | <a href="#">RLEPQSMVW</a>          |       |       |
| KB021 | 3279-3287 | 1144.57 | <a href="#">RLEPQSMVW</a>          |       |       |
| KB017 | 3357-3365 | 1024.45 | <a href="#">TSGEDVRDF</a>          |       |       |
| KB018 | 3357-3365 | 1024.45 | <a href="#">TSGEDVRDF</a>          |       |       |
| KB021 | 3388-3405 | 1954.99 | <a href="#">LPVQTVLEGDNMETPVTL</a> |       |       |
| KB012 | 3395-3405 | 1204.53 | <a href="#">EGDNMETPVTL</a>        |       |       |
| KB017 | 3406-3416 | 1215.59 | <a href="#">INFWPVDSAPA</a>        |       |       |
| KB017 | 3406-3420 | 1614.77 | <a href="#">INFWPVDSAPASSPQ</a>    |       |       |
| KB021 | 3421-3433 | 1608.73 | <a href="#">LSHDDTHSRIEHY</a>      |       |       |
| KB017 | 3448-3464 | 1909.89 | <a href="#">LNDISPNEIDDEHLL</a>    |       |       |
| KB021 | 3448-3464 | 1909.89 | <a href="#">LNDISPNEIDDEHLL</a>    |       |       |
| KB012 | 3479-3488 | 1095.6  | <a href="#">SQPRSPAQIL</a>         |       |       |
| KB003 | 3483-3496 | 1570.82 | <a href="#">SPAQILISLESEER</a>     | pSPAQ | S3483 |
| KB006 | 3483-3496 | 1570.82 | <a href="#">SPAQILISLESEER</a>     |       |       |
| KB003 | 3483-3501 | 2155.11 | <a href="#">SPAQILISLESEERGER</a>  |       |       |
| KB006 | 3483-3501 | 2155.11 | <a href="#">SPAQILISLESEERGER</a>  |       |       |
| KB007 | 3499-3509 | 1328.68 | <a href="#">LERILADLEEE</a>        |       |       |
| KB007 | 3501-3509 | 1086.56 | <a href="#">RILADLEEE</a>          |       |       |
| KB003 | 3502-3511 | 1200.6  | <a href="#">ILADLEENR</a>          |       |       |
| KB004 | 3502-3511 | 1200.6  | <a href="#">ILADLEENR</a>          |       |       |
| KB006 | 3502-3511 | 1200.6  | <a href="#">ILADLEENR</a>          |       |       |
| KB013 | 3502-3511 | 1200.6  | <a href="#">ILADLEENR</a>          |       |       |
| KB004 | 3502-3519 | 2190.06 | <a href="#">ILADLEENRNLQAEYDR</a>  |       |       |
| KB004 | 3502-3521 | 2431.23 | <a href="#">ILADLEENRNLQAEYDRK</a> |       |       |
| KB017 | 3504-3513 | 1201.56 | <a href="#">ADLEENRNL</a>          |       |       |
| KB017 | 3504-3517 | 1692.76 | <a href="#">ADLEENRNLQAEY</a>      |       |       |
| KB021 | 3504-3517 | 1692.76 | <a href="#">ADLEENRNLQAEY</a>      |       |       |
| KB004 | 3512-3521 | 1248.65 | <a href="#">NLQAEYDRK</a>          |       |       |
| KB006 | 3512-3521 | 1248.65 | <a href="#">NLQAEYDRK</a>          |       |       |

|       |           |         |                                            |       |       |
|-------|-----------|---------|--------------------------------------------|-------|-------|
| KB005 | 3526-3550 | 2685.29 | <a href="#">HKGLSPLSPPEMMPTSPQSPRDAE</a>   | SPQpS | S3545 |
| KB004 | 3528-3547 | 2105.03 | <a href="#">GLSPLSPPEMMPTSPQSPR</a>        |       |       |
| KB005 | 3528-3550 | 2420.14 | <a href="#">GLSPLSPPEMMPTSPQSPRDAE</a>     |       |       |
| KB004 | 3533-3547 | 1637.75 | <a href="#">PSPPEMMPTSPQSPR</a>            |       |       |
| KB003 | 3548-3556 | 958.5   | <a href="#">DAELIAEAK</a>                  |       |       |
| KB007 | 3555-3566 | 1447.87 | <a href="#">AKLLRQHKGRLE</a>               |       |       |
| KB004 | 3569-3585 | 2118.06 | <a href="#">MQILEDHMKQLESQHR</a>           |       |       |
| KB017 | 3571-3584 | 1702.86 | <a href="#">ILEDHMKQLESQHR</a>             |       |       |
| KB004 | 3586-3598 | 1522.85 | <a href="#">LRQLLEQPQAEAK</a>              |       |       |
| KB003 | 3588-3598 | 1253.66 | <a href="#">QLLEQPQAEAK</a>                |       |       |
| KB006 | 3588-3598 | 1253.66 | <a href="#">QLLEQPQAEAK</a>                |       |       |
| KB004 | 3588-3613 | 2768.43 | <a href="#">QLLEQPQAEAKVNGTTVSSPSTSLQR</a> |       |       |
| KB003 | 3599-3613 | 1532.78 | <a href="#">VNGTTVSSPSTSLQR</a>            |       |       |
| KB006 | 3599-3613 | 1532.78 | <a href="#">VNGTTVSSPSTSLQR</a>            |       |       |
| KB013 | 3599-3613 | 1532.78 | <a href="#">VNGTTVSSPSTSLQR</a>            |       |       |
| KB012 | 3612-3622 | 1260.61 | <a href="#">QRSOSSQPMLL</a>                |       |       |
| KB017 | 3612-3622 | 1260.61 | <a href="#">QRSOSSQPMLL</a>                |       |       |
| KB003 | 3614-3623 | 1132.55 | <a href="#">SDSSQPMLLR</a>                 |       |       |
| KB006 | 3614-3623 | 1132.55 | <a href="#">SDSSQPMLLR</a>                 | SDpSS | S3616 |
