# Supplementary material
Source: PubMed Central journal article supplement (PMC4245040)
Supplement: supp_ddu388_ddu388supp_table2.pdf [file supp_ddu388_ddu388supp_table2.pdf]

**Supplementary table 2**

Summary of peptides identified from Dp116

| Dataset name | Peptide location | Mass      | Peptide sequence            | Phosphorylated residue |
|--------------|------------------|-----------|-----------------------------|------------------------|
| KB014        | 2733 – 2754      | 2568.1765 | Q.DLQGEIETHHTDIYHNLDENGQK.I |                        |
| KB014        | 2733 – 2754      | 2568.1792 | Q.DLQGEIETHHTDIYHNLDENGQK.I |                        |
| KB014        | 2733 – 2754      | 2568.181  | Q.DLQGEIETHHTDIYHNLDENGQK.I |                        |
| KB014        | 2733 – 2754      | 2568.181  | Q.DLQGEIETHHTDIYHNLDENGQK.I |                        |
| KB014        | 2733 – 2754      | 2568.1813 | Q.DLQGEIETHHTDIYHNLDENGQK.I |                        |
| KB015        | 2733 – 2754      | 2568.1762 | Q.DLQGEIETHHTDIYHNLDENGQK.I |                        |
| KB015        | 2733 – 2754      | 2568.1783 | Q.DLQGEIETHHTDIYHNLDENGQK.I |                        |
| KB019        | 2735 – 2745      | 1305.5854 | L.QGEIETHHTDIY.H            |                        |
| KB020        | 2735 – 2745      | 1304.5854 | L.QGEIETHHTDIY.H            |                        |
| KB023        | 2735 – 2745      | 1304.589  | L.QGEIETHHTDIY.H            |                        |
| KB023        | 2735 – 2745      | 1304.589  | L.QGEIETHHTDIY.H            |                        |
| KB019        | 2746 – 2756      | 1279.6494 | Y.HNLDENGQKIL.R             |                        |
| KB019        | 2746 – 2756      | 1279.6522 | Y.HNLDENGQKIL.R             |                        |
| KB020        | 2746 – 2756      | 1279.6456 | Y.HNLDENGQKIL.R             |                        |
| KB020        | 2746 – 2756      | 1279.6483 | Y.HNLDENGQKIL.R             |                        |
| KB019        | 2757 – 2767      | 1172.564  | L.RSLEGSDEAPL.L             |                        |
| KB020        | 2757 – 2767      | 1172.5627 | L.RSLEGSDEAPL.L             |                        |
| KB020        | 2757 – 2767      | 1172.5636 | L.RSLEGSDEAPL.L             |                        |
| KB020        | 2757 – 2767      | 1173.5727 | L.RSLEGSDEAPL.L             |                        |
| KB014        | 2758 – 2770      | 1413.7126 | R.SLEGSDEAPLLQR.R           |                        |
| KB014        | 2758 – 2770      | 1413.7136 | R.SLEGSDEAPLLQR.R           |                        |
| KB015        | 2758 – 2770      | 1413.709  | R.SLEGSDEAPLLQR.R           |                        |
| KB015        | 2758 – 2770      | 1413.7116 | R.SLEGSDEAPLLQR.R           |                        |
| KB015        | 2758 – 2770      | 1413.7126 | R.SLEGSDEAPLLQR.R           |                        |
| KB015        | 2758 – 2770      | 1413.7126 | R.SLEGSDEAPLLQR.R           |                        |
| KB014        | 2771 – 2778      | 1036.5136 | R.RLDNMNFK.W                |                        |
| KB023        | 2780 – 2787      | 931.5333  | W.SELQKKSL.N                |                        |
| KB023        | 2780 – 2787      | 931.534   | W.SELQKKSL.N                |                        |
| KB023        | 2783 – 2787      | 602.3757  | L.QKKSL.N                   |                        |
| KB023        | 2788 – 2800      | 1541.7234 | L.NIRSHLEASSDQW.K           |                        |
| KB023        | 2788 – 2800      | 1541.7238 | L.NIRSHLEASSDQW.K           |                        |
| KB023        | 2788 – 2800      | 1541.7238 | L.NIRSHLEASSDQW.K           |                        |
| KB014        | 2791 – 2802      | 1442.6908 | R.SHLEASSDQWKR.L            |                        |
| KB014        | 2824 – 2836      | 1326.6946 | R.QAPIGGDFPAVQK.Q           |                        |
| KB014        | 2824 – 2836      | 1326.6956 | R.QAPIGGDFPAVQK.Q           |                        |
| KB015        | 2824 – 2836      | 1326.6948 | R.QAPIGGDFPAVQK.Q           |                        |
| KB015        | 2824 – 2836      | 1326.6948 | R.QAPIGGDFPAVQK.Q           |                        |
| KB015        | 2824 – 2836      | 1326.6948 | R.QAPIGGDFPAVQK.Q           |                        |

|       |      |   |      |           |                          |  |  |
|-------|------|---|------|-----------|--------------------------|--|--|
| KB023 | 2845 | – | 2859 | 1772.0216 | F.KRELKTKEPVIMSTL.E      |  |  |
| KB020 | 2849 | – | 2859 | 1245.6982 | L.KTKEPVIMSTL.E          |  |  |
| KB020 | 2849 | – | 2859 | 1245.7054 | L.KTKEPVIMSTL.E          |  |  |
| KB023 | 2849 | – | 2859 | 1245.7004 | L.KTKEPVIMSTL.E          |  |  |
| KB023 | 2849 | – | 2859 | 1245.7022 | L.KTKEPVIMSTL.E          |  |  |
| KB023 | 2849 | – | 2865 | 1991.1078 | L.KTKEPVIMSTLETVRIF.L    |  |  |
| KB023 | 2849 | – | 2865 | 1991.1133 | L.KTKEPVIMSTLETVRIF.L    |  |  |
| KB024 | 2849 | – | 2859 | 1245.6998 | L.KTKEPVIMSTL.E          |  |  |
| KB015 | 2850 | – | 2863 | 1602.8614 | K.TKEPVIMSTLETVR.I       |  |  |
| KB015 | 2850 | – | 2863 | 1602.8654 | K.TKEPVIMSTLETVR.I       |  |  |
| KB014 | 2852 | – | 2863 | 1373.7254 | K.EPVIMSTLETVR.I         |  |  |
| KB015 | 2852 | – | 2863 | 1373.7238 | K.EPVIMSTLETVR.I         |  |  |
| KB019 | 2860 | – | 2865 | 763.4227  | L.ETVRIF.L               |  |  |
| KB019 | 2860 | – | 2865 | 763.4254  | L.ETVRIF.L               |  |  |
| KB020 | 2860 | – | 2865 | 763.4227  | L.ETVRIF.L               |  |  |
| KB020 | 2860 | – | 2865 | 763.4254  | L.ETVRIF.L               |  |  |
| KB023 | 2860 | – | 2865 | 763.4236  | L.ETVRIF.L               |  |  |
| KB023 | 2860 | – | 2865 | 763.4238  | L.ETVRIF.L               |  |  |
| KB023 | 2860 | – | 2865 | 763.424   | L.ETVRIF.L               |  |  |
| KB023 | 2860 | – | 2866 | 876.5049  | L.ETVRIFL.T              |  |  |
| KB014 | 2864 | – | 2876 | 1515.8216 | R.IFLTEQPLEGLEK.L        |  |  |
| KB014 | 2864 | – | 2876 | 1515.8224 | R.IFLTEQPLEGLEK.L        |  |  |
| KB014 | 2864 | – | 2876 | 1515.8228 | R.IFLTEQPLEGLEK.L        |  |  |
| KB015 | 2864 | – | 2876 | 1515.8197 | R.IFLTEQPLEGLEK.L        |  |  |
| KB015 | 2864 | – | 2876 | 1515.8214 | R.IFLTEQPLEGLEK.L        |  |  |
| KB015 | 2864 | – | 2876 | 1515.824  | R.IFLTEQPLEGLEK.L        |  |  |
| KB023 | 2878 | – | 2896 | 2324.1864 | L.YQEPRELPPPEERAQNVTRL.L |  |  |
| KB023 | 2878 | – | 2896 | 2324.1882 | L.YQEPRELPPPEERAQNVTRL.L |  |  |
| KB023 | 2879 | – | 2896 | 2161.1224 | Y.QEPRELPPPEERAQNVTRL.L  |  |  |
| KB023 | 2879 | – | 2896 | 2161.1256 | Y.QEPRELPPPEERAQNVTRL.L  |  |  |
| KB023 | 2879 | – | 2897 | 2274.2084 | Y.QEPRELPPPEERAQNVTRLL.R |  |  |
| KB023 | 2879 | – | 2897 | 2274.2086 | Y.QEPRELPPPEERAQNVTRLL.R |  |  |
| KB023 | 2879 | – | 2897 | 2274.2089 | Y.QEPRELPPPEERAQNVTRLL.R |  |  |
| KB023 | 2897 | – | 2908 | 1471.7444 | L.LRKQAEVNAEW.D          |  |  |
| KB020 | 2898 | – | 2911 | 1714.8682 | L.RKQAEVNAEWDKL.N        |  |  |
| KB023 | 2898 | – | 2911 | 1714.8646 | L.RKQAEVNAEWDKL.N        |  |  |
| KB023 | 2898 | – | 2911 | 1714.8661 | L.RKQAEVNAEWDKL.N        |  |  |
| KB023 | 2898 | – | 2911 | 1714.8669 | L.RKQAEVNAEWDKL.N        |  |  |
| KB023 | 2898 | – | 2911 | 1714.868  | L.RKQAEVNAEWDKL.N        |  |  |
| KB023 | 2898 | – | 2911 | 1714.8682 | L.RKQAEVNAEWDKL.N        |  |  |
| KB014 | 2899 | – | 2914 | 1941.9954 | R.KQAEVNAEWDKLNLR.S      |  |  |
| KB015 | 2899 | – | 2914 | 1941.9917 | R.KQAEVNAEWDKLNLR.S      |  |  |

|       |      |   |      |           |                         |  |  |
|-------|------|---|------|-----------|-------------------------|--|--|
| KB015 | 2899 | – | 2914 | 1941.9944 | R.KQAEVNAEWDKLNLR.S     |  |  |
| KB015 | 2899 | – | 2914 | 1941.9989 | R.KQAEVNAEWDKLNLR.S     |  |  |
| KB015 | 2899 | – | 2914 | 1942.0075 | R.KQAEVNAEWDKLNLR.S     |  |  |
| KB015 | 2899 | – | 2914 | 1942.0075 | R.KQAEVNAEWDKLNLR.S     |  |  |
| KB014 | 2900 | – | 2914 | 1813.8992 | K.QAEVNAEWDKLNLR.S      |  |  |
| KB014 | 2900 | – | 2914 | 1813.9003 | K.QAEVNAEWDKLNLR.S      |  |  |
| KB014 | 2900 | – | 2914 | 1813.9008 | K.QAEVNAEWDKLNLR.S      |  |  |
| KB014 | 2900 | – | 2914 | 1813.9018 | K.QAEVNAEWDKLNLR.S      |  |  |
| KB015 | 2900 | – | 2914 | 1813.8996 | K.QAEVNAEWDKLNLR.S      |  |  |
| KB015 | 2900 | – | 2914 | 1813.8998 | K.QAEVNAEWDKLNLR.S      |  |  |
| KB019 | 2912 | – | 2918 | 860.4126  | L.NLRSADW.Q             |  |  |
| KB020 | 2912 | – | 2918 | 860.4132  | L.NLRSADW.Q             |  |  |
| KB023 | 2919 | – | 2929 | 1369.7672 | W.QRKIDEALERL.Q         |  |  |
| KB014 | 2929 | – | 2942 | 1613.8174 | R.LQELQEADEL.DLK.L      |  |  |
| KB014 | 2929 | – | 2942 | 1613.8202 | R.LQELQEADEL.DLK.L      |  |  |
| KB015 | 2929 | – | 2942 | 1613.8165 | R.LQELQEADEL.DLK.L      |  |  |
| KB015 | 2929 | – | 2942 | 1613.8172 | R.LQELQEADEL.DLK.L      |  |  |
| KB015 | 2929 | – | 2942 | 1613.8186 | R.LQELQEADEL.DLK.L      |  |  |
| KB015 | 2929 | – | 2942 | 1613.8195 | R.LQELQEADEL.DLK.L      |  |  |
| KB023 | 2930 | – | 2939 | 1144.5232 | L.QELQEADEL.D           |  |  |
| KB023 | 2930 | – | 2939 | 1144.5255 | L.QELQEADEL.D           |  |  |
| KB023 | 2942 | – | 2953 | 1413.8076 | L.KLRQAEVIKGSW.Q        |  |  |
| KB023 | 2944 | – | 2959 | 1781.9454 | L.RQAEVIKGSWQPVGDL.L    |  |  |
| KB014 | 2951 | – | 2970 | 2250.1453 | K.GSWQPVGDLLIDSLQDHLK.V |  |  |
| KB023 | 2954 | – | 2960 | 740.4075  | W.QPVGDLL.I             |  |  |
| KB023 | 2961 | – | 2968 | 939.4674  | L.IDSLQDHL.E            |  |  |
| KB014 | 2973 | – | 2982 | 1066.6512 | K.ALRGEIAPLK.E          |  |  |
| KB014 | 2973 | – | 2982 | 1066.6522 | K.ALRGEIAPLK.E          |  |  |
| KB014 | 2973 | – | 2987 | 1678.9508 | K.ALRGEIAPLKENVNR.V     |  |  |
| KB014 | 2973 | – | 2987 | 1678.9512 | K.ALRGEIAPLKENVNR.V     |  |  |
| KB014 | 2973 | – | 2987 | 1678.9513 | K.ALRGEIAPLKENVNR.V     |  |  |
| KB014 | 2973 | – | 2987 | 1678.9513 | K.ALRGEIAPLKENVNR.V     |  |  |
| KB015 | 2973 | – | 2982 | 1066.6512 | K.ALRGEIAPLK.E          |  |  |
| KB015 | 2973 | – | 2982 | 1066.6522 | K.ALRGEIAPLK.E          |  |  |
| KB015 | 2973 | – | 2987 | 1678.9504 | K.ALRGEIAPLKENVNR.V     |  |  |
| KB015 | 2973 | – | 2987 | 1678.9506 | K.ALRGEIAPLKENVNR.V     |  |  |
| KB015 | 2973 | – | 2987 | 1678.9507 | K.ALRGEIAPLKENVNR.V     |  |  |
| KB015 | 2973 | – | 2987 | 1678.9524 | K.ALRGEIAPLKENVNR.V     |  |  |
| KB014 | 2976 | – | 2987 | 1338.7267 | R.GEIAPLKENVNR.V        |  |  |
| KB014 | 2976 | – | 2987 | 1338.727  | R.GEIAPLKENVNR.V        |  |  |
| KB014 | 2976 | – | 2987 | 1338.7272 | R.GEIAPLKENVNR.V        |  |  |
| KB015 | 2976 | – | 2987 | 1338.7284 | R.GEIAPLKENVNR.V        |  |  |

|       |      |   |      |           |                          |  |  |
|-------|------|---|------|-----------|--------------------------|--|--|
| KB015 | 2976 | – | 2987 | 1338.7288 | R.GEIAPLKENVNR.V         |  |  |
| KB020 | 2982 | – | 2995 | 1648.8586 | L.KENVNRVNDLAHQL.T       |  |  |
| KB023 | 2982 | – | 2995 | 1648.8646 | L.KENVNRVNDLAHQL.T       |  |  |
| KB023 | 2982 | – | 2995 | 1648.8656 | L.KENVNRVNDLAHQL.T       |  |  |
| KB023 | 2982 | – | 2995 | 1648.8669 | L.KENVNRVNDLAHQL.T       |  |  |
| KB014 | 2988 | – | 2998 | 1223.6454 | R.VNDLAHQLTTL.G          |  |  |
| KB020 | 2996 | – | 3002 | 744.4327  | L.TTLGIQL.S              |  |  |
| KB023 | 2996 | – | 3002 | 744.438   | L.TTLGIQL.S              |  |  |
| KB024 | 2996 | – | 3002 | 744.4386  | L.TTLGIQL.S              |  |  |
| KB020 | 2999 | – | 3005 | 776.4027  | L.GIQLSPY.N              |  |  |
| KB023 | 2999 | – | 3005 | 776.408   | L.GIQLSPY.N              |  |  |
| KB023 | 2999 | – | 3005 | 776.4127  | L.GIQLSPY.N              |  |  |
| KB024 | 2999 | – | 3005 | 776.4075  | L.GIQLSPY.N              |  |  |
| KB014 | 3006 | – | 3016 | 1274.6442 | Y.NLSTLEDLNTR.W          |  |  |
| KB015 | 3006 | – | 3016 | 1274.649  | Y.NLSTLEDLNTR.W          |  |  |
| KB020 | 3011 | – | 3017 | 932.4312  | L.EDLNTRW.R              |  |  |
| KB023 | 3011 | – | 3017 | 932.4332  | L.EDLNTRW.R              |  |  |
| KB023 | 3011 | – | 3017 | 932.4337  | L.EDLNTRW.R              |  |  |
| KB023 | 3011 | – | 3017 | 932.4356  | L.EDLNTRW.R              |  |  |
| KB014 | 3019 | – | 3027 | 1041.5836 | R.LLQVAVEDR.V            |  |  |
| KB014 | 3019 | – | 3027 | 1041.5842 | R.LLQVAVEDR.V            |  |  |
| KB014 | 3019 | – | 3027 | 1041.5849 | R.LLQVAVEDR.V            |  |  |
| KB015 | 3019 | – | 3027 | 1041.5828 | R.LLQVAVEDR.V            |  |  |
| KB015 | 3019 | – | 3027 | 1041.5829 | R.LLQVAVEDR.V            |  |  |
| KB015 | 3019 | – | 3027 | 1041.5838 | R.LLQVAVEDR.V            |  |  |
| KB019 | 3021 | – | 3031 | 1311.7282 | L.QVAVEDRVRQL.H          |  |  |
| KB020 | 3021 | – | 3031 | 1311.7219 | L.QVAVEDRVRQL.H          |  |  |
| KB023 | 3021 | – | 3031 | 1311.7262 | L.QVAVEDRVRQL.H          |  |  |
| KB023 | 3021 | – | 3031 | 1311.7266 | L.QVAVEDRVRQL.H          |  |  |
| KB023 | 3021 | – | 3031 | 1311.727  | L.QVAVEDRVRQL.H          |  |  |
| KB023 | 3021 | – | 3038 | 2204.1209 | L.QVAVEDRVRQLHEAHRDF.G   |  |  |
| KB023 | 3021 | – | 3038 | 2204.1228 | L.QVAVEDRVRQLHEAHRDF.G   |  |  |
| KB019 | 3032 | – | 3045 | 1634.7333 | L.HEAHRDFGPASQHF.L       |  |  |
| KB020 | 3032 | – | 3045 | 1634.7309 | L.HEAHRDFGPASQHF.L       |  |  |
| KB020 | 3032 | – | 3045 | 1634.7382 | L.HEAHRDFGPASQHF.L       |  |  |
| KB020 | 3032 | – | 3045 | 1635.7282 | L.HEAHRDFGPASQHF.L       |  |  |
| KB020 | 3032 | – | 3045 | 1635.7337 | L.HEAHRDFGPASQHF.L       |  |  |
| KB023 | 3032 | – | 3038 | 910.4054  | L.HEAHRDF.G              |  |  |
| KB015 | 3037 | – | 3056 | 2245.0618 | R.DFGPASQHFLSTSVQGPWER.A |  |  |
| KB015 | 3037 | – | 3056 | 2245.0618 | R.DFGPASQHFLSTSVQGPWER.A |  |  |
| KB019 | 3039 | – | 3046 | 855.4228  | F.GPASQHFL.S             |  |  |
| KB020 | 3039 | – | 3046 | 855.4226  | F.GPASQHFL.S             |  |  |

|       |      |   |      |           |                          |            |              |
|-------|------|---|------|-----------|--------------------------|------------|--------------|
| KB019 | 3046 | - | 3054 | 973.4927  | F.LSTSVQGPW.E            |            |              |
| KB020 | 3046 | - | 3054 | 973.4827  | F.LSTSVQGPW.E            |            |              |
| KB023 | 3046 | - | 3054 | 973.487   | F.LSTSVQGPW.E            |            |              |
| KB023 | 3046 | - | 3054 | 973.4873  | F.LSTSVQGPW.E            |            |              |
| KB023 | 3046 | - | 3054 | 973.4879  | F.LSTSVQGPW.E            |            |              |
| KB023 | 3046 | - | 3054 | 973.4881  | F.LSTSVQGPW.E            |            |              |
| KB023 | 3046 | - | 3054 | 973.4881  | F.LSTSVQGPW.E            |            |              |
| KB023 | 3046 | - | 3054 | 973.4881  | F.LSTSVQGPW.E            |            |              |
| KB024 | 3046 | - | 3054 | 973.4866  | F.LSTSVQGPW.E            |            |              |
| KB024 | 3046 | - | 3054 | 973.4874  | F.LSTSVQGPW.E            |            |              |
| KB020 | 3047 | - | 3054 | 860.4027  | L.STSVQGPW.E             |            |              |
| KB020 | 3047 | - | 3054 | 860.4027  | L.STSVQGPW.E             |            |              |
| KB023 | 3047 | - | 3054 | 860.4036  | L.STSVQGPW.E             |            |              |
| KB023 | 3047 | - | 3054 | 860.405   | L.STSVQGPW.E             |            |              |
| KB019 | 3055 | - | 3065 | 1272.6808 | W.ERAISPKNKVPY.Y         |            |              |
| KB019 | 3055 | - | 3065 | 1272.6826 | W.ERAISPKNKVPY.Y         |            |              |
| KB020 | 3055 | - | 3065 | 1272.6776 | W.ERAISPKNKVPY.Y         |            |              |
| KB020 | 3055 | - | 3065 | 1272.6802 | W.ERAISPKNKVPY.Y         |            |              |
| KB023 | 3055 | - | 3065 | 1352.65   | W.ERAISPKNKVPY.Y         | ERAIS(p)NK | S327 (S3059) |
| KB014 | 3057 | - | 3065 | 987.5412  | R.AISPKNKVPY.Y           |            |              |
| KB015 | 3057 | - | 3065 | 987.5416  | R.AISPKNKVPY.Y           |            |              |
| KB023 | 3066 | - | 3085 | 2605.0642 | Y.INHETQTTCDWDHPKMTELY.Q | TQTT(p)CW  | T342 (T3074) |
| KB019 | 3077 | - | 3085 | 1132.5198 | W.DHPKMTELY.Q            |            |              |
| KB020 | 3077 | - | 3085 | 1132.518  | W.DHPKMTELY.Q            |            |              |
| KB023 | 3077 | - | 3085 | 1132.5226 | W.DHPKMTELY.Q            |            |              |
| KB014 | 3081 | - | 3095 | 1765.867  | K.MTELYQSLADLNNVR.F      |            |              |
| KB014 | 3081 | - | 3095 | 1765.869  | K.MTELYQSLADLNNVR.F      |            |              |
| KB015 | 3081 | - | 3095 | 1765.8694 | K.MTELYQSLADLNNVR.F      |            |              |
| KB015 | 3081 | - | 3095 | 1765.8704 | K.MTELYQSLADLNNVR.F      |            |              |
| KB015 | 3081 | - | 3095 | 1765.8734 | K.MTELYQSLADLNNVR.F      |            |              |
| KB019 | 3089 | - | 3096 | 947.48    | L.ADLNNVRF.S             |            |              |
| KB019 | 3089 | - | 3096 | 949.4854  | L.ADLNNVRF.S             |            |              |
| KB020 | 3089 | - | 3096 | 947.4804  | L.ADLNNVRF.S             |            |              |
| KB023 | 3089 | - | 3096 | 947.4822  | L.ADLNNVRF.S             |            |              |
| KB023 | 3089 | - | 3096 | 947.4827  | L.ADLNNVRF.S             |            |              |
| KB023 | 3089 | - | 3096 | 947.4832  | L.ADLNNVRF.S             |            |              |
| KB023 | 3089 | - | 3096 | 947.4832  | L.ADLNNVRF.S             |            |              |
| KB023 | 3092 | - | 3096 | 648.3327  | L.NNVRF.S                |            |              |
| KB023 | 3092 | - | 3096 | 648.3351  | L.NNVRF.S                |            |              |
| KB023 | 3127 | - | 3131 | 625.2824  | L.DQHNL.K                |            |              |
| KB023 | 3127 | - | 3141 | 1807.8538 | L.DQHNLKQNDQPM DIL.Q     |            |              |
| KB023 | 3132 | - | 3141 | 1200.5794 | L.KQNDQPM DIL.Q          |            |              |

|       |      |   |      |           |                                         |  |  |
|-------|------|---|------|-----------|-----------------------------------------|--|--|
| KB023 | 3132 | – | 3141 | 1200.5822 | L.KQNDQPM DIL.Q                         |  |  |
| KB024 | 3132 | – | 3141 | 1200.5816 | L.KQNDQPM DIL.Q                         |  |  |
| KB023 | 3148 | – | 3154 | 880.4658  | L.TTIYDRL.E                             |  |  |
| KB023 | 3155 | – | 3161 | 882.3827  | L.EQEHNNL.V                             |  |  |
| KB023 | 3155 | – | 3166 | 1404.7018 | L.EQEHNNLVNPL.C                         |  |  |
| KB020 | 3180 | – | 3190 | 1242.7136 | Y.DTGRTRGRIRVL.S                        |  |  |
| KB019 | 3191 | – | 3199 | 964.5654  | L.SFKTGIISL.C                           |  |  |
| KB020 | 3191 | – | 3199 | 964.5654  | L.SFKTGIISL.C                           |  |  |
| KB023 | 3191 | – | 3199 | 964.5597  | L.SFKTGIISL.C                           |  |  |
| KB023 | 3191 | – | 3199 | 964.5597  | L.SFKTGIISL.C                           |  |  |
| KB023 | 3191 | – | 3199 | 964.5598  | L.SFKTGIISL.C                           |  |  |
| KB023 | 3191 | – | 3199 | 964.5602  | L.SFKTGIISL.C                           |  |  |
| KB024 | 3191 | – | 3199 | 964.5594  | L.SFKTGIISL.C                           |  |  |
| KB023 | 3193 | – | 3199 | 730.4595  | F.KTGIISL.C                             |  |  |
| KB023 | 3193 | – | 3199 | 730.4596  | F.KTGIISL.C                             |  |  |
| KB019 | 3212 | – | 3221 | 1070.5376 | L.FKQVASSTGF.C                          |  |  |
| KB023 | 3213 | – | 3221 | 923.4718  | F.KQVASSTGF.C                           |  |  |
| KB015 | 3224 | – | 3234 | 1308.7504 | D.QRRGLLLHDS.I                          |  |  |
| KB015 | 3225 | – | 3259 | 3861.0382 | Q.RRLGLLLHDSIQIPRQLGEVASFGGSNIEPSVRSC.F |  |  |
| KB014 | 3227 | – | 3239 | 1473.8722 | R.LGLLLHDSIQIPR.Q                       |  |  |
| KB015 | 3227 | – | 3239 | 1473.8674 | R.LGLLLHDSIQIPR.Q                       |  |  |
| KB015 | 3227 | – | 3239 | 1473.868  | R.LGLLLHDSIQIPR.Q                       |  |  |
| KB015 | 3227 | – | 3239 | 1473.8695 | R.LGLLLHDSIQIPR.Q                       |  |  |
| KB019 | 3231 | – | 3241 | 1318.7254 | L.LHDSIQIPRQL.G                         |  |  |
| KB023 | 3231 | – | 3241 | 1318.7349 | L.LHDSIQIPRQL.G                         |  |  |
| KB023 | 3231 | – | 3241 | 1318.7368 | L.LHDSIQIPRQL.G                         |  |  |
| KB023 | 3231 | – | 3241 | 1318.7482 | L.LHDSIQIPRQL.G                         |  |  |
| KB019 | 3232 | – | 3241 | 1205.6454 | L.HDSIQIPRQL.G                          |  |  |
| KB023 | 3232 | – | 3241 | 1205.651  | L.HDSIQIPRQL.G                          |  |  |
| KB023 | 3232 | – | 3241 | 1205.6538 | L.HDSIQIPRQL.G                          |  |  |
| KB023 | 3232 | – | 3241 | 1205.655  | L.HDSIQIPRQL.G                          |  |  |
| KB023 | 3232 | – | 3247 | 1795.9214 | L.HDSIQIPRQLGEVASF.G                    |  |  |
| KB023 | 3232 | – | 3247 | 1795.9252 | L.HDSIQIPRQLGEVASF.G                    |  |  |
| KB014 | 3240 | – | 3247 | 849.4242  | R.QLGEVASF.G                            |  |  |
| KB014 | 3240 | – | 3257 | 1845.9229 | R.QLGEVASFGGSNIEPSVR.S                  |  |  |
| KB014 | 3240 | – | 3257 | 1845.9238 | R.QLGEVASFGGSNIEPSVR.S                  |  |  |
| KB014 | 3240 | – | 3257 | 1845.924  | R.QLGEVASFGGSNIEPSVR.S                  |  |  |
| KB014 | 3240 | – | 3257 | 1845.9302 | R.QLGEVASFGGSNIEPSVR.S                  |  |  |
| KB015 | 3240 | – | 3247 | 849.4247  | R.QLGEVASF.G                            |  |  |
| KB015 | 3240 | – | 3255 | 1590.7576 | R.QLGEVASFGGSNIEPS.V                    |  |  |
| KB015 | 3240 | – | 3257 | 1845.9253 | R.QLGEVASFGGSNIEPSVR.S                  |  |  |
| KB015 | 3240 | – | 3257 | 1845.9264 | R.QLGEVASFGGSNIEPSVR.S                  |  |  |

|       |      |   |      |           |                        |             |           |
|-------|------|---|------|-----------|------------------------|-------------|-----------|
| KB015 | 3240 | - | 3257 | 1845.9264 | R.QLGEVASFGGSNIEPSVR.S |             |           |
| KB015 | 3240 | - | 3257 | 1845.9277 | R.QLGEVASFGGSNIEPSVR.S |             |           |
| KB019 | 3261 | - | 3273 | 1443.7302 | F.QFANNKPEIEAAL.F      |             |           |
| KB020 | 3261 | - | 3273 | 1444.7454 | F.QFANNKPEIEAAL.F      |             |           |
| KB023 | 3261 | - | 3273 | 1443.7364 | F.QFANNKPEIEAAL.F      |             |           |
| KB023 | 3261 | - | 3273 | 1443.7364 | F.QFANNKPEIEAAL.F      |             |           |
| KB019 | 3263 | - | 3273 | 1168.6052 | F.ANNKPEIEAAL.F        |             |           |
| KB019 | 3263 | - | 3274 | 1315.6748 | F.ANNKPEIEAALF.L       |             |           |
| KB020 | 3263 | - | 3273 | 1168.6054 | F.ANNKPEIEAAL.F        |             |           |
| KB020 | 3263 | - | 3274 | 1315.674  | F.ANNKPEIEAALF.L       |             |           |
| KB023 | 3263 | - | 3273 | 1168.61   | F.ANNKPEIEAAL.F        |             |           |
| KB023 | 3263 | - | 3273 | 1168.6103 | F.ANNKPEIEAAL.F        |             |           |
| KB023 | 3263 | - | 3273 | 1168.6104 | F.ANNKPEIEAAL.F        |             |           |
| KB023 | 3263 | - | 3274 | 1315.676  | F.ANNKPEIEAALF.L       |             |           |
| KB023 | 3263 | - | 3274 | 1315.6768 | F.ANNKPEIEAALF.L       |             |           |
| KB023 | 3263 | - | 3274 | 1315.6769 | F.ANNKPEIEAALF.L       |             |           |
| KB023 | 3263 | - | 3274 | 1315.677  | F.ANNKPEIEAALF.L       |             |           |
| KB023 | 3263 | - | 3274 | 1315.677  | F.ANNKPEIEAALF.L       |             |           |
| KB023 | 3263 | - | 3274 | 1315.6776 | F.ANNKPEIEAALF.L       |             |           |
| KB024 | 3263 | - | 3274 | 1315.6776 | F.ANNKPEIEAALF.L       |             |           |
| KB023 | 3278 | - | 3287 | 1275.6054 | W.MRLEPQSMVW.L         |             |           |
| KB014 | 3280 | - | 3293 | 1703.9224 | R.LEPQSMVWLPVLR.V      |             |           |
| KB015 | 3280 | - | 3293 | 1703.9221 | R.LEPQSMVWLPVLR.V      |             |           |
| KB023 | 3344 | - | 3365 | 2701.0887 | KMHYPMVEYCTPTTSGEDVRDF | VEY(P)CTPTT | Y620 (Y)  |
| KB023 | 3344 | - | 3365 | 2701.0887 | KMHYPMVEYCTPTTSGEDVRDF | VEYCT(P)PTT | YT622 (T) |
| KB023 | 3379 | - | 3387 | 1105.5508 | Y.FAKHPRMGY.L          |             |           |
| KB023 | 3380 | - | 3387 | 958.4806  | F.AKHPRMGY.L           |             |           |
| KB023 | 3388 | - | 3394 | 768.4748  | Y.LPVQTVL.E            |             |           |
| KB023 | 3388 | - | 3394 | 768.4752  | Y.LPVQTVL.E            |             |           |
| KB023 | 3388 | - | 3394 | 768.4756  | Y.LPVQTVL.E            |             |           |
| KB023 | 3388 | - | 3394 | 768.4766  | Y.LPVQTVL.E            |             |           |
| KB023 | 3388 | - | 3405 | 1954.9912 | Y.LPVQTVLEGDNMETSPTL.I |             |           |
| KB023 | 3388 | - | 3405 | 1955.9854 | Y.LPVQTVLEGDNMETSPTL.I |             |           |
| KB024 | 3388 | - | 3394 | 768.4745  | Y.LPVQTVL.E            |             |           |
| KB024 | 3388 | - | 3394 | 768.4745  | Y.LPVQTVL.E            |             |           |
| KB024 | 3388 | - | 3394 | 768.475   | Y.LPVQTVL.E            |             |           |
| KB020 | 3395 | - | 3405 | 1204.5227 | L.EGDNMETSPTL.I        |             |           |
| KB023 | 3395 | - | 3405 | 1204.5279 | L.EGDNMETSPTL.I        |             |           |
| KB023 | 3395 | - | 3405 | 1204.5287 | L.EGDNMETSPTL.I        |             |           |
| KB023 | 3395 | - | 3405 | 1204.5291 | L.EGDNMETSPTL.I        |             |           |
| KB023 | 3395 | - | 3405 | 1204.5298 | L.EGDNMETSPTL.I        |             |           |
| KB023 | 3406 | - | 3421 | 1727.8472 | L.INFWPVDSAPASSPQL.S   |             |           |
| KB023 | 3406 | - | 3421 | 1727.8492 | L.INFWPVDSAPASSPQL.S   |             |           |

|       |             |           |                                  |          |              |
|-------|-------------|-----------|----------------------------------|----------|--------------|
| KB023 | 3406 - 3433 | 3285.4553 | L.INFWPVDSAPASSPQLSHDDTHSRIEHY.A | PAS(p)S  | S685 (S3417) |
| KB023 | 3406 - 3433 | 3285.4553 | L.INFWPVDSAPASSPQLSHDDTHSRIEHY.A | PASS(p)P | S686 (S3418) |
| KB023 | 3406 - 3433 | 3285.4553 | L.INFWPVDSAPASSPQLSHDDTHSRIEHY.A | PQLS(p)H | S690 (S3422) |
| KB023 | 3409 - 3433 | 2832.2854 | F.WPVDSAPASSPQLSHDDTHSRIEHY.A    |          |              |
| KB019 | 3434 - 3447 | 1527.6562 | Y.ASRLAEMENSNNGSY.L              |          |              |
| KB023 | 3434 - 3447 | 1527.664  | Y.ASRLAEMENSNNGSY.L              |          |              |
| KB023 | 3434 - 3447 | 1527.664  | Y.ASRLAEMENSNNGSY.L              |          |              |
| KB023 | 3448 - 3463 | 1796.8064 | Y.LNDSISPNESIDDEHL.L             |          |              |
| KB019 | 3449 - 3464 | 1796.7996 | L.NDSISPNESIDDEHLL.I             |          |              |
| KB023 | 3449 - 3464 | 1796.8052 | L.NDSISPNESIDDEHLL.I             |          |              |
| KB023 | 3449 - 3464 | 1796.8062 | L.NDSISPNESIDDEHLL.I             |          |              |
| KB023 | 3449 - 3464 | 1796.8096 | L.NDSISPNESIDDEHLL.I             |          |              |
| KB023 | 3473 - 3488 | 1829.8652 | L.NQDSPLSQPRSPAQIL.I             | NQDS(P)  | S744 (S3476) |
| KB023 | 3473 - 3488 | 1829.8716 | L.NQDSPLSQPRSPAQIL.I             | NQDS(P)  | S744 (S3476) |
| KB019 | 3479 - 3488 | 1095.6008 | L.SQPRSPAQIL.I                   |          |              |
| KB019 | 3479 - 3488 | 1095.6014 | L.SQPRSPAQIL.I                   |          |              |
| KB020 | 3479 - 3488 | 1095.6    | L.SQPRSPAQIL.I                   |          |              |
| KB020 | 3479 - 3488 | 1095.6002 | L.SQPRSPAQIL.I                   |          |              |
| KB023 | 3479 - 3488 | 1095.5982 | L.SQPRSPAQIL.I                   |          |              |
| KB023 | 3479 - 3488 | 1095.603  | L.SQPRSPAQIL.I                   |          |              |
| KB023 | 3479 - 3488 | 1095.604  | L.SQPRSPAQIL.I                   |          |              |
| KB023 | 3479 - 3488 | 1095.6043 | L.SQPRSPAQIL.I                   |          |              |
| KB023 | 3479 - 3488 | 1095.6048 | L.SQPRSPAQIL.I                   |          |              |
| KB023 | 3479 - 3488 | 1095.6052 | L.SQPRSPAQIL.I                   |          |              |
| KB023 | 3479 - 3488 | 1095.6052 | L.SQPRSPAQIL.I                   |          |              |
| KB023 | 3479 - 3488 | 1095.6054 | L.SQPRSPAQIL.I                   |          |              |
| KB023 | 3479 - 3488 | 1095.6054 | L.SQPRSPAQIL.I                   |          |              |
| KB023 | 3479 - 3488 | 1095.6054 | L.SQPRSPAQIL.I                   |          |              |
| KB023 | 3479 - 3488 | 1095.6054 | L.SQPRSPAQIL.I                   |          |              |
| KB023 | 3479 - 3488 | 1095.6054 | L.SQPRSPAQIL.I                   |          |              |
| KB023 | 3479 - 3488 | 1095.6054 | L.SQPRSPAQIL.I                   |          |              |
| KB023 | 3479 - 3488 | 1095.6056 | L.SQPRSPAQIL.I                   |          |              |
| KB023 | 3479 - 3488 | 1096.6054 | L.SQPRSPAQIL.I                   |          |              |
| KB023 | 3479 - 3488 | 1096.6054 | L.SQPRSPAQIL.I                   |          |              |
| KB023 | 3479 - 3488 | 1096.6054 | L.SQPRSPAQIL.I                   |          |              |
| KB023 | 3479 - 3488 | 1096.6054 | L.SQPRSPAQIL.I                   |          |              |
| KB023 | 3479 - 3488 | 1096.6054 | L.SQPRSPAQIL.I                   |          |              |
| KB014 | 3483 - 3496 | 1570.8222 | R.SPAQILISLESEER.G               |          |              |
| KB014 | 3483 - 3496 | 1570.824  | R.SPAQILISLESEER.G               |          |              |
| KB014 | 3483 - 3496 | 1570.8247 | R.SPAQILISLESEER.G               |          |              |
| KB014 | 3483 - 3496 | 1570.8247 | R.SPAQILISLESEER.G               |          |              |
| KB014 | 3483 - 3496 | 1570.8276 | R.SPAQILISLESEER.G               |          |              |
| KB014 | 3483 - 3501 | 2155.1161 | R.SPAQILISLESEERGER.I            |          |              |



|       |      |   |      |           |                                      |          |              |
|-------|------|---|------|-----------|--------------------------------------|----------|--------------|
| KB014 | 3483 | – | 3501 | 2155.1174 | R.SPAQILISLESEERGELER.I              |          |              |
| KB014 | 3483 | – | 3501 | 2155.1197 | R.SPAQILISLESEERGELER.I              |          |              |
| KB014 | 3483 | – | 3501 | 2155.124  | R.SPAQILISLESEERGELER.I              |          |              |
| KB015 | 3483 | – | 3496 | 1570.82   | R.SPAQILISLESEER.G                   |          |              |
| KB015 | 3483 | – | 3496 | 1570.8242 | R.SPAQILISLESEER.G                   |          |              |
| KB015 | 3483 | – | 3501 | 2155.115  | R.SPAQILISLESEERGELER.I              |          |              |
| KB015 | 3483 | – | 3501 | 2155.1164 | R.SPAQILISLESEERGELER.I              |          |              |
| KB023 | 3489 | – | 3499 | 1260.6199 | L.ISLESEERGEL.E                      |          |              |
| KB023 | 3489 | – | 3499 | 1260.6212 | L.ISLESEERGEL.E                      |          |              |
| KB023 | 3489 | – | 3499 | 1260.6254 | L.ISLESEERGEL.E                      |          |              |
| KB023 | 3492 | – | 3503 | 1458.7254 | L.ESEERGELERIL.A                     |          |              |
| KB023 | 3492 | – | 3503 | 1458.7318 | L.ESEERGELERIL.A                     |          |              |
| KB014 | 3499 | – | 3505 | 830.4854  | E.LERILAD.L                          |          |              |
| KB014 | 3502 | – | 3511 | 1200.6    | R.ILADLEENR.N                        |          |              |
| KB014 | 3502 | – | 3511 | 1200.6012 | R.ILADLEENR.N                        |          |              |
| KB014 | 3502 | – | 3511 | 1200.6018 | R.ILADLEENR.N                        |          |              |
| KB014 | 3502 | – | 3519 | 2190.0576 | R.ILADLEENRNLQAEYDR.L                |          |              |
| KB014 | 3502 | – | 3519 | 2190.0589 | R.ILADLEENRNLQAEYDR.L                |          |              |
| KB014 | 3502 | – | 3519 | 2190.0594 | R.ILADLEENRNLQAEYDR.L                |          |              |
| KB015 | 3502 | – | 3511 | 1200.5988 | R.ILADLEENR.N                        |          |              |
| KB015 | 3502 | – | 3511 | 1200.6    | R.ILADLEENR.N                        |          |              |
| KB015 | 3502 | – | 3511 | 1200.6006 | R.ILADLEENR.N                        |          |              |
| KB015 | 3502 | – | 3519 | 2190.0528 | R.ILADLEENRNLQAEYDR.L                |          |              |
| KB015 | 3502 | – | 3519 | 2190.0598 | R.ILADLEENRNLQAEYDR.L                |          |              |
| KB015 | 3502 | – | 3519 | 2190.0598 | R.ILADLEENRNLQAEYDR.L                |          |              |
| KB019 | 3504 | – | 3513 | 1201.553  | L.ADLEENRNL.Q                        |          |              |
| KB020 | 3504 | – | 3513 | 1201.5552 | L.ADLEENRNL.Q                        |          |              |
| KB015 | 3512 | – | 3521 | 1248.6478 | R.NLQAEYDR.LK.Q                      |          |              |
| KB023 | 3518 | – | 3529 | 1487.791  | Y.DRLKQQHEHKGL.S                     |          |              |
| KB023 | 3518 | – | 3529 | 1488.7942 | Y.DRLKQQHEHKGL.S                     |          |              |
| KB023 | 3527 | - | 3558 | 3511.7282 | H.KGLSPLPSPPEMMPTSPQSPRDAELIAEAKLL.R | MPT(p)SP | T809 (T3541) |
| KB023 | 3527 | - | 3558 | 3511.7282 | H.KGLSPLPSPPEMMPTSPQSPRDAELIAEAKLL.R | MPTS(p)P | S810 (S3542) |
| KB023 | 3527 | - | 3558 | 3511.7282 | H.KGLSPLPSPPEMMPTSPQSPRDAELIAEAKLL.R | SPQS(p)P | S813 (S3545) |
| KB023 | 3527 | - | 3558 | 3431.7582 | H.KGLSPLPSPPEMMPTSPQSPRDAELIAEAKLL.R |          |              |
| KB014 | 3528 | – | 3547 | 2105.0322 | K.GLSPLPSPPEMMPTSPQSPR.D             |          |              |
| KB015 | 3528 | – | 3547 | 2105.0236 | K.GLSPLPSPPEMMPTSPQSPR.D             |          |              |
| KB015 | 3528 | – | 3547 | 2105.0236 | K.GLSPLPSPPEMMPTSPQSPR.D             |          |              |
| KB015 | 3528 | – | 3547 | 2105.0338 | K.GLSPLPSPPEMMPTSPQSPR.D             |          |              |
| KB015 | 3528 | – | 3547 | 2105.0344 | K.GLSPLPSPPEMMPTSPQSPR.D             |          |              |
| KB023 | 3552 | – | 3558 | 756.4758  | L.IAEAKLL.R                          |          |              |
| KB023 | 3552 | – | 3558 | 756.476   | L.IAEAKLL.R                          |          |              |
| KB020 | 3573 | – | 3583 | 1339.6282 | L.EDHNKQLESQ.L.H                     |          |              |

|       |      |   |      |           |                                       |          |              |
|-------|------|---|------|-----------|---------------------------------------|----------|--------------|
| KB020 | 3573 | - | 3583 | 1339.6342 | L.EDHNKQLESQ.L.H                      |          |              |
| KB014 | 3586 | - | 3598 | 1522.8496 | R.LRQLLEQPQAEAK.V                     |          |              |
| KB014 | 3586 | - | 3598 | 1523.8582 | R.LRQLLEQPQAEAK.V                     |          |              |
| KB015 | 3586 | - | 3598 | 1522.8493 | R.LRQLLEQPQAEAK.V                     |          |              |
| KB015 | 3586 | - | 3598 | 1522.8502 | R.LRQLLEQPQAEAK.V                     |          |              |
| KB015 | 3586 | - | 3598 | 1522.8511 | R.LRQLLEQPQAEAK.V                     |          |              |
| KB015 | 3588 | - | 3598 | 1253.6646 | R.LLLEQPQAEAK.V                       |          |              |
| KB023 | 3590 | - | 3611 | 2243.1282 | L.LEQPQAEAKVNGTTVSSPSTSL.Q            |          |              |
| KB023 | 3590 | - | 3611 | 2243.129  | L.LEQPQAEAKVNGTTVSSPSTSL.Q            |          |              |
| KB023 | 3590 | - | 3611 | 2243.1292 | L.LEQPQAEAKVNGTTVSSPSTSL.Q            |          |              |
| KB023 | 3591 | - | 3611 | 2130.044  | L.EQPQAEAKVNGTTVSSPSTSL.Q             |          |              |
| KB023 | 3591 | - | 3611 | 2130.0444 | L.EQPQAEAKVNGTTVSSPSTSL.Q             |          |              |
| KB023 | 3591 | - | 3611 | 2130.045  | L.EQPQAEAKVNGTTVSSPSTSL.Q             |          |              |
| KB023 | 3591 | - | 3611 | 2131.0286 | L.EQPQAEAKVNGTTVSSPSTSL.Q             |          |              |
| KB023 | 3591 | - | 3611 | 2131.0294 | L.EQPQAEAKVNGTTVSSPSTSL.Q             |          |              |
| KB023 | 3591 | - | 3611 | 2131.0298 | L.EQPQAEAKVNGTTVSSPSTSL.Q             |          |              |
| KB023 | 3591 | - | 3611 | 2131.0304 | L.EQPQAEAKVNGTTVSSPSTSL.Q             |          |              |
| KB023 | 3591 | - | 3611 | 2210.9934 | L.EQPQAEAKVNGTTVSSPSTSL.Q             | SSPS(p)  |              |
| KB023 | 3591 | - | 3611 | 2210.9934 | L.EQPQAEAKVNGTTVSSPSTSL.Q             | SSPS(p)  |              |
| KB023 | 3591 | - | 3611 | 3226.4486 | L.EQPQAEAKVNGTTVSSPSTSLQRS DSSQPM.L   | SSPS(p)  | S876 (S3608) |
| KB023 | 3591 | - | 3622 | 3468.6067 | L.EQPQAEAKVNGTTVSSPSTSLQRS DSSQPM.L.R | RS(p)DSS | S882 (S3614) |
| KB023 | 3591 | - | 3622 | 3388.6367 | L.EQPQAEAKVNGTTVSSPSTSLQRS DSSQPM.L.R |          |              |
| KB015 | 3599 | - | 3613 | 1532.7794 | K.VNGTTVSSPSTSLQR.S                   |          |              |
| KB023 | 3601 | - | 3622 | 2374.0711 | N.GTTVSSPSTSLQRS DSSQPM.L.R           | RSDS(p)S | S884 (S3616) |
| KB023 | 3601 | - | 3622 | 2374.0711 | N.GTTVSSPSTSLQRS DSSQPM.L.R           | RSDSS(p) | S885 (S3617) |
| KB023 | 3601 | - | 3622 | 2374.0711 | N.GTTVSSPSTSLQRS DSSQPM.L.R           |          |              |
| KB023 | 3612 | - | 3622 | 1340.587  | L.QRSDSSQPM.L.R                       | RSDSS(p) | S885 (S3617) |
| KB014 | 3614 | - | 3623 | 1132.5562 | R.SDSSQPM.L.R.V                       |          |              |
| KB014 | 3614 | - | 3623 | 1212.5212 | R.SDSSQPM.L.R.V                       | RSDS(p)S | S884 (S3616) |
| KB015 | 3614 | - | 3623 | 1132.557  | R.SDSSQPM.L.R.V                       |          |              |
| KB015 | 3614 | - | 3623 | 1212.5238 | R.SDSSQPM.L.R.V                       | RSDS(p)S | S884 (S3616) |
