# Supplementary material
Source: PubMed Central journal article supplement (PMC4245040)
Supplement: supp_ddu388_ddu388supp_table3.pdf [file supp_ddu388_ddu388supp_table3.pdf]

**Supplementary table 3**

Peptides observed in Dp116 isolated from transfected HEK-293 cells. Colour coding indicates biological replicates.

| Start | – | End  | Observed | Mr(expt)  | Mr(calc)  | ppm   | M | Score | Expect  | U | Peptide         |
|-------|---|------|----------|-----------|-----------|-------|---|-------|---------|---|-----------------|
| 2735  | – | 2745 | 653.3018 | 1304.589  | 1304.5885 | 0.39  | 0 | 18    | 1.8     | U | L.QGEIETHTDIY.H |
| 2735  | – | 2745 | 653.3017 | 1304.5888 | 1304.5885 | 0.3   | 0 | 15    | 3.1     | U | L.QGEIETHTDIY.H |
| 2735  | – | 2745 | 653.3015 | 1304.5885 | 1304.5885 | 0.016 | 0 | 12    | 6.2     | U | L.QGEIETHTDIY.H |
| 2735  | – | 2745 | 653.3016 | 1304.5887 | 1304.5885 | 0.2   | 0 | 12    | 5.8     | U | L.QGEIETHTDIY.H |
| 2746  | – | 2756 | 640.8329 | 1279.6512 | 1279.652  | -0.64 | 1 | 48    | 0.0011  | U | Y.HNLDENGQKIL.R |
| 2746  | – | 2756 | 427.5577 | 1279.6513 | 1279.652  | -0.58 | 1 | 41    | 0.0048  | U | Y.HNLDENGQKIL.R |
| 2746  | – | 2756 | 640.8329 | 1279.6513 | 1279.652  | -0.54 | 1 | 29    | 0.093   | U | Y.HNLDENGQKIL.R |
| 2746  | – | 2756 | 640.834  | 1279.6534 | 1279.652  | 1.08  | 1 | 44    | 0.0029  | U | Y.HNLDENGQKIL.R |
| 2746  | – | 2756 | 640.8328 | 1279.6511 | 1279.652  | -0.74 | 1 | 53    | 0.00038 | U | Y.HNLDENGQKIL.R |
| 2746  | – | 2756 | 427.5578 | 1279.6516 | 1279.652  | -0.36 | 1 | 48    | 0.0011  | U | Y.HNLDENGQKIL.R |
| 2746  | – | 2756 | 640.8334 | 1279.6522 | 1279.652  | 0.12  | 1 | 41    | 0.0054  | U | Y.HNLDENGQKIL.R |
| 2746  | – | 2756 | 640.8334 | 1279.6523 | 1279.652  | 0.22  | 1 | 27    | 0.14    | U | Y.HNLDENGQKIL.R |
| 2746  | – | 2756 | 640.832  | 1279.6495 | 1279.652  | -1.98 | 1 | 37    | 0.012   | U | Y.HNLDENGQKIL.R |
| 2746  | – | 2756 | 640.8326 | 1279.6506 | 1279.652  | -1.12 | 1 | 48    | 0.0011  | U | Y.HNLDENGQKIL.R |
| 2746  | – | 2756 | 427.5576 | 1279.651  | 1279.652  | -0.79 | 1 | 27    | 0.12    | U | Y.HNLDENGQKIL.R |
| 2746  | – | 2756 | 640.8331 | 1279.6516 | 1279.652  | -0.35 | 1 | 44    | 0.0029  | U | Y.HNLDENGQKIL.R |
| 2746  | – | 2756 | 640.8328 | 1279.6511 | 1279.652  | -0.74 | 1 | 41    | 0.0057  | U | Y.HNLDENGQKIL.R |
| 2746  | – | 2756 | 427.5579 | 1279.6518 | 1279.652  | -0.15 | 1 | 44    | 0.0024  | U | Y.HNLDENGQKIL.R |
| 2746  | – | 2756 | 640.8333 | 1279.6521 | 1279.652  | 0.027 | 1 | 46    | 0.0016  | U | Y.HNLDENGQKIL.R |
| 2746  | – | 2756 | 640.8334 | 1279.6522 | 1279.652  | 0.12  | 1 | 27    | 0.13    | U | Y.HNLDENGQKIL.R |
| 2749  | – | 2756 | 458.7405 | 915.4665  | 915.4661  | 0.42  | 0 | 16    | 1.4     | U | L.DENGQKIL.R    |
| 2749  | – | 2756 | 458.7404 | 915.4662  | 915.4661  | 0.021 | 0 | 6     | 14      | U | L.DENGQKIL.R    |
| 2757  | – | 2767 | 587.2905 | 1172.5664 | 1172.5673 | -0.79 | 1 | 55    | 0.00022 | U | L.RSLEGSDEAPL.L |
| 2757  | – | 2767 | 587.2911 | 1172.5677 | 1172.5673 | 0.36  | 1 | 37    | 0.012   | U | L.RSLEGSDEAPL.L |
| 2757  | – | 2767 | 587.2905 | 1172.5665 | 1172.5673 | -0.69 | 1 | 42    | 0.0042  | U | L.RSLEGSDEAPL.L |
| 2757  | – | 2767 | 587.291  | 1172.5674 | 1172.5673 | 0.043 | 1 | 53    | 0.00035 | U | L.RSLEGSDEAPL.L |
| 2757  | – | 2767 | 587.2899 | 1172.5652 | 1172.5673 | -1.83 | 1 | 25    | 0.21    | U | L.RSLEGSDEAPL.L |
| 2757  | – | 2767 | 587.2911 | 1172.5676 | 1172.5673 | 0.25  | 1 | 30    | 0.07    | U | L.RSLEGSDEAPL.L |
| 2757  | – | 2767 | 587.2915 | 1172.5685 | 1172.5673 | 0.98  | 1 | 17    | 1.3     | U | L.RSLEGSDEAPL.L |
| 2757  | – | 2767 | 587.2906 | 1172.5666 | 1172.5673 | -0.58 | 1 | 22    | 0.47    | U | L.RSLEGSDEAPL.L |
| 2768  | – | 2772 | 343.2268 | 684.4391  | 684.4395  | -0.51 | 1 | 9     | 3       | U | L.LQRRL.D       |
| 2768  | – | 2772 | 343.2268 | 684.4391  | 684.4395  | -0.59 | 1 | 10    | 2.9     | U | L.LQRRL.D       |
| 2768  | – | 2772 | 343.2267 | 684.4389  | 684.4395  | -0.86 | 1 | 8     | 4.1     | U | L.LQRRL.D       |
| 2769  | – | 2777 | 597.2958 | 1192.5771 | 1192.5771 | 0.016 | 1 | 13    | 3.8     | U | L.QRRLDNMNF.K   |

|      |   |      |          |           |           |        |   |    |        |   |                   |
|------|---|------|----------|-----------|-----------|--------|---|----|--------|---|-------------------|
| 2769 | - | 2777 | 398.5334 | 1192.5782 | 1192.5771 | 0.95   | 1 | 8  | 14     | U | L.QRRLDNMNF.K     |
| 2769 | - | 2777 | 398.5329 | 1192.5768 | 1192.5771 | -0.28  | 1 | 2  | 48     | U | L.QRRLDNMNF.K     |
| 2769 | - | 2777 | 597.2959 | 1192.5772 | 1192.5771 | 0.12   | 1 | 13 | 4.2    | U | L.QRRLDNMNF.K     |
| 2769 | - | 2777 | 597.295  | 1192.5755 | 1192.5771 | -1.31  | 1 | 18 | 1.2    | U | L.QRRLDNMNF.K     |
| 2769 | - | 2777 | 398.5331 | 1192.5774 | 1192.5771 | 0.26   | 1 | 14 | 3      | U | L.QRRLDNMNF.K     |
| 2769 | - | 2777 | 398.5332 | 1192.5777 | 1192.5771 | 0.49   | 1 | 7  | 18     | U | L.QRRLDNMNF.K     |
| 2773 | - | 2779 | 477.7103 | 953.406   | 953.4065  | -0.57  | 1 | 11 | 4.6    | U | L.DNMNFKW.S       |
| 2773 | - | 2779 | 477.7108 | 953.407   | 953.4065  | 0.52   | 1 | 8  | 10     | U | L.DNMNFKW.S       |
| 2773 | - | 2779 | 477.7109 | 953.4073  | 953.4065  | 0.77   | 1 | 6  | 16     | U | L.DNMNFKW.S       |
| 2773 | - | 2779 | 477.7108 | 953.4071  | 953.4065  | 0.58   | 1 | 16 | 1.5    | U | L.DNMNFKW.S       |
| 2778 | - | 2782 | 331.679  | 661.3435  | 661.3435  | 0.054  | 1 | 26 | 0.1    | U | F.KWSEL.Q         |
| 2778 | - | 2782 | 331.6801 | 661.3457  | 661.3435  | 3.28   | 1 | 21 | 0.64   | U | F.KWSEL.Q         |
| 2778 | - | 2782 | 331.679  | 661.3434  | 661.3435  | -0.13  | 1 | 24 | 0.14   | U | F.KWSEL.Q         |
| 2778 | - | 2782 | 331.6791 | 661.3437  | 661.3435  | 0.33   | 1 | 24 | 0.27   | U | F.KWSEL.Q         |
| 2778 | - | 2782 | 331.679  | 661.3435  | 661.3435  | -0.039 | 1 | 26 | 0.11   | U | F.KWSEL.Q         |
| 2778 | - | 2782 | 331.6797 | 661.3449  | 661.3435  | 2.08   | 1 | 19 | 1      | U | F.KWSEL.Q         |
| 2778 | - | 2782 | 331.6788 | 661.343   | 661.3435  | -0.78  | 1 | 26 | 0.1    | U | F.KWSEL.Q         |
| 2778 | - | 2782 | 331.6793 | 661.344   | 661.3435  | 0.79   | 1 | 29 | 0.084  | U | F.KWSEL.Q         |
| 2780 | - | 2787 | 466.7742 | 931.5338  | 931.5338  | -0.027 | 1 | 35 | 0.013  | U | W.SELQKKSL.N      |
| 2780 | - | 2787 | 311.5186 | 931.534   | 931.5338  | 0.22   | 1 | 22 | 0.29   | U | W.SELQKKSL.N      |
| 2780 | - | 2787 | 466.7743 | 931.534   | 931.5338  | 0.17   | 1 | 28 | 0.07   | U | W.SELQKKSL.N      |
| 2780 | - | 2787 | 311.5187 | 931.5344  | 931.5338  | 0.62   | 1 | 17 | 0.85   | U | W.SELQKKSL.N      |
| 2780 | - | 2787 | 466.7739 | 931.5332  | 931.5338  | -0.62  | 1 | 28 | 0.075  | U | W.SELQKKSL.N      |
| 2780 | - | 2787 | 311.5185 | 931.5336  | 931.5338  | -0.27  | 1 | 15 | 1.5    | U | W.SELQKKSL.N      |
| 2780 | - | 2787 | 466.7738 | 931.5331  | 931.5338  | -0.75  | 1 | 34 | 0.016  | U | W.SELQKKSL.N      |
| 2780 | - | 2787 | 311.5187 | 931.5342  | 931.5338  | 0.42   | 1 | 14 | 1.6    | U | W.SELQKKSL.N      |
| 2783 | - | 2787 | 302.1949 | 602.3753  | 602.3751  | 0.34   | 0 | 9  | 2.9    | U | L.QKKSL.N         |
| 2783 | - | 2787 | 302.1953 | 602.3759  | 602.3751  | 1.35   | 0 | 10 | 2.3    | U | L.QKKSL.N         |
| 2783 | - | 2787 | 302.1949 | 602.3752  | 602.3751  | 0.13   | 0 | 17 | 0.51   | U | L.QKKSL.N         |
| 2783 | - | 2787 | 302.1953 | 602.3761  | 602.3751  | 1.66   | 0 | 16 | 0.67   | U | L.QKKSL.N         |
| 2783 | - | 2787 | 302.1958 | 602.3771  | 602.3751  | 3.28   | 0 | 11 | 1.9    | U | L.QKKSL.N         |
| 2783 | - | 2787 | 302.1947 | 602.3748  | 602.3751  | -0.57  | 0 | 18 | 0.45   | U | L.QKKSL.N         |
| 2783 | - | 2787 | 302.1949 | 602.3752  | 602.3751  | 0.035  | 0 | 12 | 1.4    | U | L.QKKSL.N         |
| 2783 | - | 2787 | 302.1949 | 602.3753  | 602.3751  | 0.34   | 0 | 16 | 0.69   | U | L.QKKSL.N         |
| 2783 | - | 2787 | 302.1952 | 602.3759  | 602.3751  | 1.25   | 0 | 12 | 1.7    | U | L.QKKSL.N         |
| 2788 | - | 2793 | 370.2143 | 738.414   | 738.4137  | 0.44   | 0 | 16 | 0.76   | U | L.NIRSHL.E        |
| 2788 | - | 2793 | 370.2144 | 738.4142  | 738.4137  | 0.77   | 0 | 17 | 0.62   | U | L.NIRSHL.E        |
| 2788 | - | 2800 | 771.8679 | 1541.7212 | 1541.7222 | -0.7   | 1 | 44 | 0.0032 | U | L.NIRSHLEASSDQW.K |

|      |   |      |          |           |           |        |   |    |          |   |                                       |
|------|---|------|----------|-----------|-----------|--------|---|----|----------|---|---------------------------------------|
| 2788 | - | 2800 | 514.9146 | 1541.722  | 1541.7222 | -0.15  | 1 | 33 | 0.04     | U | L.NIRSHLEASDQW.K                      |
| 2788 | - | 2793 | 370.2141 | 738.4136  | 738.4137  | -0.056 | 0 | 14 | 1.4      | U | L.NIRSHL.E                            |
| 2788 | - | 2793 | 370.2142 | 738.4139  | 738.4137  | 0.36   | 0 | 11 | 2.8      | U | L.NIRSHL.E                            |
| 2788 | - | 2800 | 514.9146 | 1541.722  | 1541.7222 | -0.15  | 1 | 47 | 0.0016   | U | L.NIRSHLEASDQW.K                      |
| 2788 | - | 2800 | 771.8684 | 1541.7223 | 1541.7222 | 0.013  | 1 | 52 | 0.00054  | U | L.NIRSHLEASDQW.K                      |
| 2788 | - | 2793 | 370.214  | 738.4134  | 738.4137  | -0.39  | 0 | 15 | 1.1      | U | L.NIRSHL.E                            |
| 2788 | - | 2793 | 370.2143 | 738.4141  | 738.4137  | 0.61   | 0 | 14 | 1.4      | U | L.NIRSHL.E                            |
| 2788 | - | 2800 | 771.8682 | 1541.7218 | 1541.7222 | -0.3   | 1 | 62 | 5.50E-05 | U | L.NIRSHLEASDQW.K                      |
| 2788 | - | 2800 | 514.9148 | 1541.7226 | 1541.7222 | 0.2    | 1 | 21 | 0.62     | U | L.NIRSHLEASDQW.K                      |
| 2788 | - | 2793 | 370.2141 | 738.4137  | 738.4137  | 0.11   | 0 | 14 | 1.3      | U | L.NIRSHL.E                            |
| 2788 | - | 2793 | 370.2142 | 738.4138  | 738.4137  | 0.19   | 0 | 16 | 0.88     | U | L.NIRSHL.E                            |
| 2788 | - | 2800 | 771.8683 | 1541.7221 | 1541.7222 | -0.066 | 1 | 47 | 0.0015   | U | L.NIRSHLEASDQW.K                      |
| 2788 | - | 2800 | 514.915  | 1541.7231 | 1541.7222 | 0.56   | 1 | 36 | 0.019    | U | L.NIRSHLEASDQW.K                      |
| 2845 | - | 2859 | 591.6818 | 1772.0236 | 1772.0229 | 0.39   | 1 | 7  | 2.4      | U | F.KRELKTKEPVIMSTL.E                   |
| 2845 | - | 2859 | 597.3483 | 1789.023  | 1788.0179 | 562    | 1 | 7  | 1.7      | U | F.KRELKTKEPVIMSTL.E + Oxidation (M)   |
| 2849 | - | 2859 | 623.858  | 1245.7015 | 1245.7002 | 1.02   | 0 | 50 | 0.00023  | U | L.KTKEPVIMSTL.E                       |
| 2849 | - | 2859 | 416.2417 | 1245.7034 | 1245.7002 | 2.51   | 0 | 31 | 0.021    | U | L.KTKEPVIMSTL.E                       |
| 2849 | - | 2859 | 421.5729 | 1261.6968 | 1261.6952 | 1.3    | 0 | 7  | 5.6      | U | L.KTKEPVIMSTL.E + Oxidation (M)       |
| 2849 | - | 2865 | 664.7115 | 1991.1126 | 1991.1125 | 0.058  | 1 | 50 | 0.00012  | U | L.KTKEPVIMSTLETVRIF.L                 |
| 2849 | - | 2865 | 670.0428 | 2007.1065 | 2007.1074 | -0.45  | 1 | 73 | 8.70E-07 | U | L.KTKEPVIMSTLETVRIF.L + Oxidation (M) |
| 2849 | - | 2859 | 623.8569 | 1245.6993 | 1245.7002 | -0.74  | 0 | 52 | 0.00019  | U | L.KTKEPVIMSTL.E                       |
| 2849 | - | 2859 | 416.2405 | 1245.6998 | 1245.7002 | -0.36  | 0 | 8  | 6        | U | L.KTKEPVIMSTL.E                       |
| 2849 | - | 2859 | 421.5721 | 1261.6944 | 1261.6952 | -0.59  | 0 | 6  | 9.2      | U | L.KTKEPVIMSTL.E + Oxidation (M)       |
| 2849 | - | 2865 | 664.7133 | 1991.1181 | 1991.1125 | 2.82   | 1 | 42 | 0.00072  | U | L.KTKEPVIMSTLETVRIF.L                 |
| 2849 | - | 2859 | 623.8573 | 1245.7    | 1245.7002 | -0.15  | 0 | 47 | 0.00063  | U | L.KTKEPVIMSTL.E                       |
| 2849 | - | 2859 | 416.2408 | 1245.7004 | 1245.7002 | 0.15   | 0 | 24 | 0.13     | U | L.KTKEPVIMSTL.E                       |
| 2849 | - | 2859 | 416.2408 | 1245.7006 | 1245.7002 | 0.3    | 0 | 13 | 1.6      | U | L.KTKEPVIMSTL.E                       |
| 2849 | - | 2859 | 623.8576 | 1245.7007 | 1245.7002 | 0.33   | 0 | 53 | 0.00014  | U | L.KTKEPVIMSTL.E                       |
| 2849 | - | 2865 | 664.7114 | 1991.1123 | 1991.1125 | -0.13  | 1 | 66 | 3.00E-06 | U | L.KTKEPVIMSTLETVRIF.L                 |
| 2860 | - | 2865 | 382.7185 | 763.4225  | 763.4228  | -0.41  | 0 | 14 | 1.9      | U | L.ETVRIF.L                            |
| 2860 | - | 2865 | 382.7188 | 763.4231  | 763.4228  | 0.31   | 0 | 17 | 1.1      | U | L.ETVRIF.L                            |
| 2860 | - | 2865 | 382.7187 | 763.4229  | 763.4228  | 0.065  | 0 | 15 | 1.4      | U | L.ETVRIF.L                            |
| 2860 | - | 2865 | 382.7186 | 763.4227  | 763.4228  | -0.17  | 0 | 14 | 1.8      | U | L.ETVRIF.L                            |
| 2872 | - | 2877 | 344.6973 | 687.38    | 687.3803  | -0.44  | 1 | 11 | 6.6      | U | L.EGLEKLY                             |
| 2872 | - | 2877 | 344.6976 | 687.3807  | 687.3803  | 0.63   | 1 | 13 | 4.1      | U | L.EGLEKLY                             |
| 2878 | - | 2896 | 582.0537 | 2324.1857 | 2324.1873 | -0.65  | 1 | 6  | 7.2      | U | L.YQEPRELPPEERAQNVTRL.L               |
| 2878 | - | 2896 | 582.3038 | 2325.186  | 2324.1873 | 430    | 1 | 7  | 6.3      | U | L.YQEPRELPPEERAQNVTRL.L               |
| 2878 | - | 2896 | 582.054  | 2324.187  | 2324.1873 | -0.13  | 1 | 13 | 1.6      | U | L.YQEPRELPPEERAQNVTRL.L               |

|      |   |      |          |           |           |        |   |    |         |   |                          |
|------|---|------|----------|-----------|-----------|--------|---|----|---------|---|--------------------------|
| 2878 | - | 2896 | 775.7368 | 2324.1884 | 2324.1873 | 0.51   | 1 | 6  | 7.1     | U | L.YQEPRELPPPEERAQNVTRL.L |
| 2878 | - | 2896 | 582.0536 | 2324.1855 | 2324.1873 | -0.76  | 1 | 9  | 3.8     | U | L.YQEPRELPPPEERAQNVTRL.L |
| 2878 | - | 2896 | 775.7369 | 2324.1888 | 2324.1873 | 0.67   | 1 | 4  | 12      | U | L.YQEPRELPPPEERAQNVTRL.L |
| 2878 | - | 2896 | 775.7353 | 2324.184  | 2324.1873 | -1.38  | 1 | 11 | 2.5     | U | L.YQEPRELPPPEERAQNVTRL.L |
| 2878 | - | 2896 | 582.0534 | 2324.1845 | 2324.1873 | -1.18  | 1 | 6  | 7.6     | U | L.YQEPRELPPPEERAQNVTRL.L |
| 2878 | - | 2896 | 776.0698 | 2325.1876 | 2324.1873 | 430    | 1 | 3  | 17      | U | L.YQEPRELPPPEERAQNVTRL.L |
| 2878 | - | 2896 | 582.3051 | 2325.1914 | 2324.1873 | 432    | 1 | 2  | 20      | U | L.YQEPRELPPPEERAQNVTRL.L |
| 2879 | - | 2896 | 721.382  | 2161.124  | 2161.1239 | 0.053  | 0 | 22 | 0.18    | U | Y.QEPRELPPPEERAQNVTRL.L  |
| 2879 | - | 2896 | 541.2885 | 2161.1247 | 2161.1239 | 0.36   | 0 | 22 | 0.18    | U | Y.QEPRELPPPEERAQNVTRL.L  |
| 2879 | - | 2897 | 759.0748 | 2274.2027 | 2274.208  | -2.35  | 1 | 26 | 0.051   | U | Y.QEPRELPPPEERAQNVTRLL.R |
| 2879 | - | 2897 | 569.5588 | 2274.206  | 2274.208  | -0.87  | 1 | 9  | 2.8     | U | Y.QEPRELPPPEERAQNVTRLL.R |
| 2879 | - | 2896 | 721.3818 | 2161.1235 | 2161.1239 | -0.2   | 0 | 7  | 5.3     | U | Y.QEPRELPPPEERAQNVTRL.L  |
| 2879 | - | 2896 | 541.2885 | 2161.1247 | 2161.1239 | 0.36   | 0 | 12 | 1.7     | U | Y.QEPRELPPPEERAQNVTRL.L  |
| 2879 | - | 2897 | 759.0762 | 2274.2067 | 2274.208  | -0.57  | 1 | 13 | 1       | U | Y.QEPRELPPPEERAQNVTRLL.R |
| 2879 | - | 2897 | 569.5594 | 2274.2084 | 2274.208  | 0.2    | 1 | 13 | 0.98    | U | Y.QEPRELPPPEERAQNVTRLL.R |
| 2879 | - | 2896 | 721.3823 | 2161.125  | 2161.1239 | 0.48   | 0 | 15 | 0.79    | U | Y.QEPRELPPPEERAQNVTRL.L  |
| 2879 | - | 2896 | 541.2887 | 2161.1257 | 2161.1239 | 0.81   | 0 | 14 | 1.1     | U | Y.QEPRELPPPEERAQNVTRL.L  |
| 2879 | - | 2896 | 541.5385 | 2162.1249 | 2161.1239 | 463    | 0 | 0  | 25      | U | Y.QEPRELPPPEERAQNVTRL.L  |
| 2879 | - | 2897 | 759.0764 | 2274.2074 | 2274.208  | -0.25  | 1 | 31 | 0.015   | U | Y.QEPRELPPPEERAQNVTRLL.R |
| 2879 | - | 2897 | 569.5596 | 2274.2094 | 2274.208  | 0.63   | 1 | 20 | 0.18    | U | Y.QEPRELPPPEERAQNVTRLL.R |
| 2879 | - | 2896 | 721.3821 | 2161.1244 | 2161.1239 | 0.22   | 0 | 9  | 3.2     | U | Y.QEPRELPPPEERAQNVTRL.L  |
| 2879 | - | 2896 | 541.2889 | 2161.1264 | 2161.1239 | 1.15   | 0 | 22 | 0.16    | U | Y.QEPRELPPPEERAQNVTRL.L  |
| 2879 | - | 2897 | 759.0762 | 2274.2067 | 2274.208  | -0.57  | 1 | 23 | 0.11    | U | Y.QEPRELPPPEERAQNVTRLL.R |
| 2879 | - | 2897 | 569.5595 | 2274.2089 | 2274.208  | 0.41   | 1 | 12 | 1.2     | U | Y.QEPRELPPPEERAQNVTRLL.R |
| 2897 | - | 2908 | 736.8777 | 1471.7408 | 1471.7419 | -0.73  | 1 | 39 | 0.0084  | U | L.LRKQAEVNAEW.D          |
| 2897 | - | 2908 | 491.5879 | 1471.7418 | 1471.7419 | -0.036 | 1 | 24 | 0.25    | U | L.LRKQAEVNAEW.D          |
| 2897 | - | 2908 | 736.8787 | 1471.7428 | 1471.7419 | 0.59   | 1 | 38 | 0.0093  | U | L.LRKQAEVNAEW.D          |
| 2897 | - | 2908 | 491.5883 | 1471.7431 | 1471.7419 | 0.83   | 1 | 25 | 0.2     | U | L.LRKQAEVNAEW.D          |
| 2897 | - | 2908 | 491.5875 | 1471.7407 | 1471.7419 | -0.78  | 1 | 9  | 7.6     | U | L.LRKQAEVNAEW.D          |
| 2897 | - | 2908 | 736.8785 | 1471.7424 | 1471.7419 | 0.35   | 1 | 33 | 0.03    | U | L.LRKQAEVNAEW.D          |
| 2897 | - | 2908 | 736.8782 | 1471.7418 | 1471.7419 | -0.069 | 1 | 38 | 0.01    | U | L.LRKQAEVNAEW.D          |
| 2897 | - | 2908 | 491.588  | 1471.7422 | 1471.7419 | 0.21   | 1 | 17 | 1.2     | U | L.LRKQAEVNAEW.D          |
| 2897 | - | 2908 | 737.3796 | 1472.7447 | 1471.7419 | 681    | 1 | 36 | 0.015   | U | L.LRKQAEVNAEW.D          |
| 2898 | - | 2908 | 453.8933 | 1358.6581 | 1358.6578 | 0.2    | 0 | 21 | 0.55    | U | L.LRKQAEVNAEW.D          |
| 2898 | - | 2908 | 680.3366 | 1358.6587 | 1358.6578 | 0.61   | 0 | 25 | 0.21    | U | L.LRKQAEVNAEW.D          |
| 2898 | - | 2911 | 572.6273 | 1714.8601 | 1714.8638 | -2.14  | 1 | 38 | 0.0091  | U | L.LRKQAEVNAEWDKL.N       |
| 2898 | - | 2911 | 429.7233 | 1714.8641 | 1714.8638 | 0.17   | 1 | 27 | 0.13    | U | L.LRKQAEVNAEWDKL.N       |
| 2898 | - | 2911 | 858.4395 | 1714.8644 | 1714.8638 | 0.32   | 1 | 49 | 0.00075 | U | L.LRKQAEVNAEWDKL.N       |

|      |   |      |          |           |           |        |   |    |         |   |                   |
|------|---|------|----------|-----------|-----------|--------|---|----|---------|---|-------------------|
| 2898 | - | 2911 | 572.6291 | 1714.8654 | 1714.8638 | 0.96   | 1 | 41 | 0.0054  | U | L.RKQAEVNAEWDKL.N |
| 2898 | - | 2908 | 453.8931 | 1358.6576 | 1358.6578 | -0.21  | 0 | 17 | 1.4     | U | L.RKQAEVNAEW.D    |
| 2898 | - | 2908 | 680.3362 | 1358.6579 | 1358.6578 | 0.071  | 0 | 28 | 0.11    | U | L.RKQAEVNAEW.D    |
| 2898 | - | 2911 | 572.6277 | 1714.8612 | 1714.8638 | -1.5   | 1 | 42 | 0.004   | U | L.RKQAEVNAEWDKL.N |
| 2898 | - | 2911 | 572.6284 | 1714.8634 | 1714.8638 | -0.22  | 1 | 24 | 0.22    | U | L.RKQAEVNAEWDKL.N |
| 2898 | - | 2911 | 429.7232 | 1714.8637 | 1714.8638 | -0.047 | 1 | 32 | 0.039   | U | L.RKQAEVNAEWDKL.N |
| 2898 | - | 2911 | 858.4393 | 1714.8641 | 1714.8638 | 0.18   | 1 | 50 | 0.00066 | U | L.RKQAEVNAEWDKL.N |
| 2898 | - | 2908 | 453.8933 | 1358.6581 | 1358.6578 | 0.2    | 0 | 20 | 0.67    | U | L.RKQAEVNAEW.D    |
| 2898 | - | 2908 | 680.3364 | 1358.6582 | 1358.6578 | 0.25   | 0 | 31 | 0.058   | U | L.RKQAEVNAEW.D    |
| 2898 | - | 2911 | 572.6281 | 1714.8625 | 1714.8638 | -0.75  | 1 | 29 | 0.079   | U | L.RKQAEVNAEWDKL.N |
| 2898 | - | 2911 | 858.4388 | 1714.8631 | 1714.8638 | -0.39  | 1 | 28 | 0.085   | U | L.RKQAEVNAEWDKL.N |
| 2898 | - | 2911 | 572.6284 | 1714.8632 | 1714.8638 | -0.32  | 1 | 34 | 0.024   | U | L.RKQAEVNAEWDKL.N |
| 2898 | - | 2911 | 429.7233 | 1714.8641 | 1714.8638 | 0.17   | 1 | 33 | 0.03    | U | L.RKQAEVNAEWDKL.N |
| 2898 | - | 2911 | 572.6287 | 1714.8643 | 1714.8638 | 0.32   | 1 | 1  | 47      | U | L.RKQAEVNAEWDKL.N |
| 2898 | - | 2911 | 572.9629 | 1715.8668 | 1714.8638 | 585    | 1 | 10 | 5.5     | U | L.RKQAEVNAEWDKL.N |
| 2898 | - | 2908 | 680.3362 | 1358.6579 | 1358.6578 | 0.071  | 0 | 31 | 0.062   | U | L.RKQAEVNAEW.D    |
| 2898 | - | 2908 | 453.8933 | 1358.6581 | 1358.6578 | 0.2    | 0 | 18 | 1.1     | U | L.RKQAEVNAEW.D    |
| 2898 | - | 2911 | 572.6281 | 1714.8625 | 1714.8638 | -0.75  | 1 | 43 | 0.0034  | U | L.RKQAEVNAEWDKL.N |
| 2898 | - | 2911 | 429.7233 | 1714.8641 | 1714.8638 | 0.17   | 1 | 24 | 0.24    | U | L.RKQAEVNAEWDKL.N |
| 2898 | - | 2911 | 858.4397 | 1714.8648 | 1714.8638 | 0.61   | 1 | 48 | 0.00099 | U | L.RKQAEVNAEWDKL.N |
| 2898 | - | 2911 | 572.6292 | 1714.8658 | 1714.8638 | 1.17   | 1 | 16 | 1.5     | U | L.RKQAEVNAEWDKL.N |
| 2912 | - | 2918 | 431.2144 | 860.4142  | 860.414   | 0.2    | 1 | 30 | 0.078   | U | L.NLRSADW.Q       |
| 2912 | - | 2918 | 431.2139 | 860.4133  | 860.414   | -0.86  | 1 | 26 | 0.15    | U | L.NLRSADW.Q       |
| 2912 | - | 2918 | 431.2142 | 860.4138  | 860.414   | -0.3   | 1 | 30 | 0.076   | U | L.NLRSADW.Q       |
| 2912 | - | 2918 | 431.2143 | 860.414   | 860.414   | -0.083 | 1 | 32 | 0.05    | U | L.NLRSADW.Q       |
| 2912 | - | 2918 | 431.214  | 860.4135  | 860.414   | -0.58  | 1 | 23 | 0.34    | U | L.NLRSADW.Q       |
| 2912 | - | 2918 | 431.2143 | 860.414   | 860.414   | -0.013 | 1 | 35 | 0.022   | U | L.NLRSADW.Q       |
| 2914 | - | 2918 | 317.651  | 633.2875  | 633.2871  | 0.7    | 0 | 14 | 1.7     | U | L.RSADW.Q         |
| 2914 | - | 2918 | 317.6508 | 633.2871  | 633.2871  | 0.032  | 0 | 16 | 1.2     | U | L.RSADW.Q         |
| 2914 | - | 2918 | 317.6508 | 633.287   | 633.2871  | -0.16  | 0 | 12 | 3.2     | U | L.RSADW.Q         |
| 2914 | - | 2918 | 317.6511 | 633.2877  | 633.2871  | 0.99   | 0 | 12 | 2.8     | U | L.RSADW.Q         |
| 2919 | - | 2926 | 486.7771 | 971.5397  | 971.54    | -0.26  | 0 | 30 | 0.044   | U | W.QRKIDEAL.E      |
| 2919 | - | 2926 | 324.854  | 971.5401  | 971.54    | 0.13   | 0 | 19 | 0.49    | U | W.QRKIDEAL.E      |
| 2919 | - | 2929 | 457.5965 | 1369.7678 | 1369.7677 | 0.028  | 1 | 28 | 0.033   | U | W.QRKIDEALERL.Q   |
| 2919 | - | 2926 | 486.7773 | 971.54    | 971.54    | 0.052  | 0 | 30 | 0.034   | U | W.QRKIDEAL.E      |
| 2919 | - | 2926 | 324.854  | 971.5403  | 971.54    | 0.32   | 0 | 21 | 0.33    | U | W.QRKIDEAL.E      |
| 2919 | - | 2929 | 457.5965 | 1369.7678 | 1369.7677 | 0.028  | 1 | 37 | 0.0048  | U | W.QRKIDEALERL.Q   |
| 2919 | - | 2926 | 324.8539 | 971.5398  | 971.54    | -0.15  | 0 | 9  | 6       | U | W.QRKIDEAL.E      |

|      |   |      |          |           |           |        |   |    |         |   |                    |
|------|---|------|----------|-----------|-----------|--------|---|----|---------|---|--------------------|
| 2919 | - | 2926 | 486.7773 | 971.5401  | 971.54    | 0.18   | 0 | 27 | 0.08    | U | W.QRKIDEAL.E       |
| 2919 | - | 2929 | 457.5965 | 1369.7676 | 1369.7677 | -0.11  | 1 | 29 | 0.026   | U | W.QRKIDEALERL.Q    |
| 2919 | - | 2929 | 457.9309 | 1370.771  | 1369.7677 | 732    | 1 | 40 | 0.0025  | U | W.QRKIDEALERL.Q    |
| 2919 | - | 2926 | 486.777  | 971.5394  | 971.54    | -0.58  | 0 | 22 | 0.25    | U | W.QRKIDEAL.E       |
| 2919 | - | 2929 | 457.5967 | 1369.7682 | 1369.7677 | 0.36   | 1 | 43 | 0.0013  | U | W.QRKIDEALERL.Q    |
| 2927 | - | 2932 | 394.2189 | 786.4232  | 786.4235  | -0.44  | 1 | 30 | 0.056   |   | L.ERLQEL.Q         |
| 2927 | - | 2932 | 394.2192 | 786.4239  | 786.4235  | 0.49   | 1 | 18 | 1       | U | L.ERLQEL.Q         |
| 2930 | - | 2939 | 573.2695 | 1144.5245 | 1144.5248 | -0.22  | 1 | 14 | 3.1     | U | L.QELQEADEL.D      |
| 2930 | - | 2939 | 573.2698 | 1144.525  | 1144.5248 | 0.2    | 1 | 9  | 8.9     | U | L.QELQEADEL.D      |
| 2944 | - | 2953 | 587.3229 | 1172.6312 | 1172.6302 | 0.86   | 0 | 31 | 0.031   | U | L.RQAEVIKGSW.Q     |
| 2944 | - | 2953 | 391.8837 | 1172.6293 | 1172.6302 | -0.79  | 0 | 27 | 0.074   | U | L.RQAEVIKGSW.Q     |
| 2944 | - | 2953 | 587.3226 | 1172.6306 | 1172.6302 | 0.34   | 0 | 30 | 0.04    | U | L.RQAEVIKGSW.Q     |
| 2944 | - | 2953 | 587.3228 | 1172.6311 | 1172.6302 | 0.76   | 0 | 27 | 0.09    | U | L.RQAEVIKGSW.Q     |
| 2944 | - | 2953 | 391.8843 | 1172.6312 | 1172.6302 | 0.85   | 0 | 33 | 0.018   | U | L.RQAEVIKGSW.Q     |
| 2944 | - | 2953 | 391.8839 | 1172.63   | 1172.6302 | -0.16  | 0 | 28 | 0.066   | U | L.RQAEVIKGSW.Q     |
| 2944 | - | 2953 | 587.3224 | 1172.6302 | 1172.6302 | 0.031  | 0 | 49 | 0.00057 | U | L.RQAEVIKGSW.Q     |
| 2965 | - | 2974 | 394.2278 | 1179.6614 | 1179.6611 | 0.24   | 1 | 21 | 0.17    | U | L.QDHLEKVKAL.R     |
| 2965 | - | 2974 | 394.2277 | 1179.6612 | 1179.6611 | 0.085  | 1 | 24 | 0.094   | U | L.QDHLEKVKAL.R     |
| 2965 | - | 2974 | 394.2276 | 1179.6611 | 1179.6611 | -0.07  | 1 | 17 | 0.52    | U | L.QDHLEKVKAL.R     |
| 2965 | - | 2974 | 394.2276 | 1179.6611 | 1179.6611 | -0.07  | 1 | 24 | 0.097   | U | L.QDHLEKVKAL.R     |
| 2975 | - | 2981 | 378.2239 | 754.4333  | 754.4337  | -0.52  | 0 | 18 | 0.36    | U | L.RGEIAPL.K        |
| 2975 | - | 2981 | 378.2242 | 754.4339  | 754.4337  | 0.21   | 0 | 22 | 0.15    | U | L.RGEIAPL.K        |
| 2975 | - | 2981 | 378.2241 | 754.4337  | 754.4337  | -0.034 | 0 | 32 | 0.018   | U | L.RGEIAPL.K        |
| 2975 | - | 2981 | 378.2242 | 754.4338  | 754.4337  | 0.048  | 0 | 31 | 0.021   | U | L.RGEIAPL.K        |
| 2975 | - | 2981 | 378.224  | 754.4334  | 754.4337  | -0.44  | 0 | 33 | 0.014   | U | L.RGEIAPL.K        |
| 2982 | - | 2991 | 400.8825 | 1199.6256 | 1199.6258 | -0.18  | 0 | 10 | 5.9     | U | L.KENVNRVNDL.A     |
| 2982 | - | 2991 | 600.8206 | 1199.6267 | 1199.6258 | 0.72   | 0 | 40 | 0.0066  | U | L.KENVNRVNDL.A     |
| 2982 | - | 2995 | 413.223  | 1648.863  | 1648.8645 | -0.91  | 1 | 4  | 18      | U | L.KENVNRVNDLAHQL.T |
| 2982 | - | 2995 | 550.6287 | 1648.8643 | 1648.8645 | -0.089 | 1 | 7  | 8.6     | U | L.KENVNRVNDLAHQL.T |
| 2982 | - | 2991 | 600.8203 | 1199.6259 | 1199.6258 | 0.11   | 0 | 29 | 0.085   | U | L.KENVNRVNDL.A     |
| 2982 | - | 2995 | 413.2233 | 1648.8641 | 1648.8645 | -0.24  | 1 | 11 | 3.6     | U | L.KENVNRVNDLAHQL.T |
| 2982 | - | 2995 | 550.6291 | 1648.8656 | 1648.8645 | 0.69   | 1 | 10 | 4.7     | U | L.KENVNRVNDLAHQL.T |
| 2982 | - | 2991 | 600.8206 | 1199.6266 | 1199.6258 | 0.62   | 0 | 39 | 0.0072  | U | L.KENVNRVNDL.A     |
| 2982 | - | 2995 | 413.2225 | 1648.861  | 1648.8645 | -2.1   | 1 | 6  | 13      | U | L.KENVNRVNDLAHQL.T |
| 2982 | - | 2995 | 550.6287 | 1648.8643 | 1648.8645 | -0.089 | 1 | 17 | 0.91    | U | L.KENVNRVNDLAHQL.T |
| 2982 | - | 2991 | 600.8206 | 1199.6266 | 1199.6258 | 0.62   | 0 | 25 | 0.21    | U | L.KENVNRVNDL.A     |
| 2982 | - | 2995 | 825.4385 | 1648.8624 | 1648.8645 | -1.26  | 1 | 21 | 0.38    | U | L.KENVNRVNDLAHQL.T |
| 2982 | - | 2995 | 550.6288 | 1648.8647 | 1648.8645 | 0.13   | 1 | 9  | 6.2     | U | L.KENVNRVNDLAHQL.T |



|      |   |      |          |           |           |         |   |    |       |   |                        |
|------|---|------|----------|-----------|-----------|---------|---|----|-------|---|------------------------|
| 2992 | - | 2998 | 392.2217 | 782.4289  | 782.4286  | 0.36    | 1 | 21 | 0.35  | U | L.AHQLTTL.G            |
| 2992 | - | 2998 | 392.2216 | 782.4287  | 782.4286  | 0.12    | 1 | 25 | 0.14  | U | L.AHQLTTL.G            |
| 2992 | - | 2998 | 392.2218 | 782.429   | 782.4286  | 0.43    | 1 | 24 | 0.18  | U | L.AHQLTTL.G            |
| 2992 | - | 2998 | 392.2216 | 782.4286  | 782.4286  | -0.033  | 1 | 26 | 0.08  | U | L.AHQLTTL.G            |
| 3011 | - | 3017 | 467.2252 | 932.4358  | 932.4352  | 0.63    | 1 | 30 | 0.07  | U | L.EDLNTRW.R            |
| 3011 | - | 3017 | 467.225  | 932.4355  | 932.4352  | 0.3     | 1 | 41 | 0.005 | U | L.EDLNTRW.R            |
| 3011 | - | 3017 | 467.2249 | 932.4352  | 932.4352  | -0.027  | 1 | 26 | 0.16  | U | L.EDLNTRW.R            |
| 3011 | - | 3017 | 467.2247 | 932.4348  | 932.4352  | -0.42   | 1 | 29 | 0.085 | U | L.EDLNTRW.R            |
| 3021 | - | 3031 | 438.2491 | 1311.7255 | 1311.7259 | -0.29   | 0 | 13 | 1.2   | U | L.QVAVEDRVRQL.H        |
| 3021 | - | 3031 | 656.8703 | 1311.726  | 1311.7259 | 0.12    | 0 | 16 | 0.67  | U | L.QVAVEDRVRQL.H        |
| 3021 | - | 3038 | 552.0372 | 2204.1196 | 2204.1199 | -0.14   | 1 | 9  | 4     | U | L.QVAVEDRVRQLHEAHRDF.G |
| 3021 | - | 3038 | 441.8315 | 2204.1213 | 2204.1199 | 0.66    | 1 | 12 | 2.3   | U | L.QVAVEDRVRQLHEAHRDF.G |
| 3021 | - | 3031 | 656.8706 | 1311.7267 | 1311.7259 | 0.58    | 0 | 21 | 0.2   | U | L.QVAVEDRVRQL.H        |
| 3021 | - | 3031 | 438.2496 | 1311.727  | 1311.7259 | 0.83    | 0 | 10 | 2.5   | U | L.QVAVEDRVRQL.H        |
| 3021 | - | 3038 | 441.8313 | 2204.1203 | 2204.1199 | 0.17    | 1 | 20 | 0.38  | U | L.QVAVEDRVRQLHEAHRDF.G |
| 3021 | - | 3031 | 438.2492 | 1311.7258 | 1311.7259 | -0.075  | 0 | 19 | 0.38  | U | L.QVAVEDRVRQL.H        |
| 3021 | - | 3031 | 656.8704 | 1311.7262 | 1311.7259 | 0.21    | 0 | 21 | 0.22  | U | L.QVAVEDRVRQL.H        |
| 3021 | - | 3031 | 438.5829 | 1312.7267 | 1311.7259 | 763     | 0 | 15 | 0.93  | U | L.QVAVEDRVRQL.H        |
| 3021 | - | 3031 | 656.8697 | 1311.7248 | 1311.7259 | -0.81   | 0 | 25 | 0.094 | U | L.QVAVEDRVRQL.H        |
| 3021 | - | 3031 | 438.2492 | 1311.7259 | 1311.7259 | -0.0061 | 0 | 10 | 2.6   | U | L.QVAVEDRVRQL.H        |
| 3021 | - | 3038 | 552.037  | 2204.1191 | 2204.1199 | -0.36   | 1 | 4  | 14    | U | L.QVAVEDRVRQLHEAHRDF.G |
| 3021 | - | 3038 | 552.2876 | 2205.1213 | 2204.1199 | 454     | 1 | 12 | 2.2   | U | L.QVAVEDRVRQLHEAHRDF.G |
| 3032 | - | 3038 | 456.2097 | 910.4048  | 910.4046  | 0.29    | 0 | 16 | 1.9   | U | L.HEAHRDF.G            |
| 3032 | - | 3038 | 304.4757 | 910.4052  | 910.4046  | 0.71    | 0 | 11 | 6.8   | U | L.HEAHRDF.G            |
| 3032 | - | 3045 | 409.6902 | 1634.7318 | 1634.7338 | -1.27   | 1 | 11 | 7.6   | U | L.HEAHRDFGPASQHF.L     |
| 3032 | - | 3045 | 545.9181 | 1634.7324 | 1634.7338 | -0.85   | 1 | 10 | 8.3   | U | L.HEAHRDFGPASQHF.L     |
| 3032 | - | 3045 | 545.9183 | 1634.733  | 1634.7338 | -0.52   | 1 | 17 | 1.9   | U | L.HEAHRDFGPASQHF.L     |
| 3032 | - | 3045 | 409.6907 | 1634.7336 | 1634.7338 | -0.15   | 1 | 12 | 5.5   | U | L.HEAHRDFGPASQHF.L     |
| 3032 | - | 3045 | 545.9186 | 1634.7339 | 1634.7338 | 0.042   | 1 | 20 | 0.77  | U | L.HEAHRDFGPASQHF.L     |
| 3032 | - | 3045 | 546.2535 | 1635.7388 | 1634.7338 | 615     | 1 | 15 | 2.4   | U | L.HEAHRDFGPASQHF.L     |
| 3032 | - | 3038 | 456.2095 | 910.4045  | 910.4046  | -0.044  | 0 | 18 | 1.4   | U | L.HEAHRDF.G            |
| 3032 | - | 3038 | 304.4757 | 910.4053  | 910.4046  | 0.81    | 0 | 11 | 7     | U | L.HEAHRDF.G            |
| 3032 | - | 3045 | 409.6908 | 1634.7341 | 1634.7338 | 0.15    | 1 | 11 | 6.5   | U | L.HEAHRDFGPASQHF.L     |
| 3032 | - | 3045 | 545.9188 | 1634.7346 | 1634.7338 | 0.49    | 1 | 20 | 0.85  | U | L.HEAHRDFGPASQHF.L     |
| 3032 | - | 3045 | 545.9188 | 1634.7346 | 1634.7338 | 0.49    | 1 | 18 | 1.4   | U | L.HEAHRDFGPASQHF.L     |
| 3032 | - | 3045 | 545.9188 | 1634.7346 | 1634.7338 | 0.49    | 1 | 23 | 0.45  | U | L.HEAHRDFGPASQHF.L     |
| 3032 | - | 3045 | 409.6916 | 1634.7371 | 1634.7338 | 2.01    | 1 | 9  | 9.7   | U | L.HEAHRDFGPASQHF.L     |
| 3032 | - | 3045 | 546.2537 | 1635.7393 | 1634.7338 | 615     | 1 | 13 | 4.1   | U | L.HEAHRDFGPASQHF.L     |

|      |   |      |          |           |           |         |   |    |          |   |                                 |
|------|---|------|----------|-----------|-----------|---------|---|----|----------|---|---------------------------------|
| 3032 | - | 3045 | 409.9422 | 1635.7396 | 1634.7338 | 615     | 1 | 9  | 11       | U | L.HEAHRDFGPASQHF.L              |
| 3032 | - | 3038 | 304.4755 | 910.4046  | 910.4046  | 0.0088  | 0 | 9  | 10       | U | L.HEAHRDF.G                     |
| 3032 | - | 3038 | 456.2096 | 910.4046  | 910.4046  | 0.09    | 0 | 19 | 0.97     | U | L.HEAHRDF.G                     |
| 3032 | - | 3045 | 545.9183 | 1634.7332 | 1634.7338 | -0.41   | 1 | 8  | 15       | U | L.HEAHRDFGPASQHF.L              |
| 3032 | - | 3045 | 409.691  | 1634.7349 | 1634.7338 | 0.67    | 1 | 13 | 4.4      | U | L.HEAHRDFGPASQHF.L              |
| 3032 | - | 3045 | 545.9189 | 1634.735  | 1634.7338 | 0.71    | 1 | 9  | 11       | U | L.HEAHRDFGPASQHF.L              |
| 3032 | - | 3045 | 546.2529 | 1635.737  | 1634.7338 | 614     | 1 | 5  | 27       | U | L.HEAHRDFGPASQHF.L              |
| 3032 | - | 3038 | 456.2094 | 910.4041  | 910.4046  | -0.45   | 0 | 20 | 0.84     | U | L.HEAHRDF.G                     |
| 3032 | - | 3038 | 304.4755 | 910.4047  | 910.4046  | 0.11    | 0 | 11 | 6.2      | U | L.HEAHRDF.G                     |
| 3032 | - | 3045 | 409.6902 | 1634.7319 | 1634.7338 | -1.2    | 1 | 10 | 9.4      | U | L.HEAHRDFGPASQHF.L              |
| 3032 | - | 3045 | 545.9185 | 1634.7335 | 1634.7338 | -0.18   | 1 | 6  | 21       | U | L.HEAHRDFGPASQHF.L              |
| 3032 | - | 3045 | 409.6907 | 1634.7337 | 1634.7338 | -0.079  | 1 | 11 | 6.5      | U | L.HEAHRDFGPASQHF.L              |
| 3032 | - | 3045 | 545.9189 | 1634.7348 | 1634.7338 | 0.6     | 1 | 18 | 1.3      | U | L.HEAHRDFGPASQHF.L              |
| 3032 | - | 3045 | 546.2541 | 1635.7406 | 1634.7338 | 616     | 1 | 11 | 7.3      | U | L.HEAHRDFGPASQHF.L              |
| 3039 | - | 3045 | 372.1773 | 742.34    | 742.3398  | 0.21    | 0 | 16 | 1.6      | U | F.GPASQHF.L                     |
| 3039 | - | 3046 | 428.7191 | 855.4237  | 855.4239  | -0.19   | 1 | 14 | 2.6      | U | F.GPASQHFL.S                    |
| 3039 | - | 3045 | 372.1774 | 742.3402  | 742.3398  | 0.46    | 0 | 29 | 0.082    | U | F.GPASQHF.L                     |
| 3039 | - | 3046 | 428.7193 | 855.424   | 855.4239  | 0.096   | 1 | 16 | 1.7      | U | F.GPASQHFL.S                    |
| 3046 | - | 3054 | 487.7506 | 973.4867  | 973.4869  | -0.18   | 1 | 10 | 9        | U | F.LSTSVQGPW.E                   |
| 3046 | - | 3054 | 487.7504 | 973.4862  | 973.4869  | -0.75   | 1 | 6  | 19       | U | F.LSTSVQGPW.E                   |
| 3046 | - | 3054 | 487.7511 | 973.4876  | 973.4869  | 0.76    | 1 | 12 | 4.1      | U | F.LSTSVQGPW.E                   |
| 3055 | - | 3065 | 637.3475 | 1272.6804 | 1272.6826 | -1.73   | 0 | 19 | 0.69     |   | W.ERAISPKNKVPY.Y                |
| 3055 | - | 3065 | 425.2349 | 1272.6828 | 1272.6826 | 0.12    | 0 | 38 | 0.0073   |   | W.ERAISPKNKVPY.Y                |
| 3055 | - | 3065 | 637.349  | 1272.6834 | 1272.6826 | 0.66    | 0 | 32 | 0.025    |   | W.ERAISPKNKVPY.Y                |
| 3055 | - | 3065 | 677.3318 | 1352.6491 | 1352.6489 | 0.16    | 0 | 31 | 0.064    |   | W.ERAISPKNKVPY.Y + Phospho (ST) |
| 3055 | - | 3065 | 637.3479 | 1272.6812 | 1272.6826 | -1.06   | 0 | 58 | 8.50E-05 |   | W.ERAISPKNKVPY.Y                |
| 3055 | - | 3065 | 425.2345 | 1272.6818 | 1272.6826 | -0.66   | 0 | 34 | 0.019    |   | W.ERAISPKNKVPY.Y                |
| 3055 | - | 3065 | 637.3486 | 1272.6826 | 1272.6826 | -0.0079 | 0 | 13 | 2.4      |   | W.ERAISPKNKVPY.Y                |
| 3055 | - | 3065 | 637.8506 | 1273.6867 | 1272.6826 | 789     | 0 | 21 | 0.37     |   | W.ERAISPKNKVPY.Y                |
| 3055 | - | 3065 | 677.3317 | 1352.6489 | 1352.6489 | -0.019  | 0 | 29 | 0.096    |   | W.ERAISPKNKVPY.Y + Phospho (ST) |
| 3055 | - | 3065 | 425.2348 | 1272.6825 | 1272.6826 | -0.09   | 0 | 35 | 0.013    |   | W.ERAISPKNKVPY.Y                |
| 3055 | - | 3065 | 637.3486 | 1272.6827 | 1272.6826 | 0.088   | 0 | 35 | 0.015    |   | W.ERAISPKNKVPY.Y                |
| 3055 | - | 3065 | 637.3492 | 1272.6838 | 1272.6826 | 0.95    | 0 | 14 | 1.6      |   | W.ERAISPKNKVPY.Y                |
| 3055 | - | 3065 | 637.8508 | 1273.687  | 1272.6826 | 789     | 0 | 14 | 1.7      |   | W.ERAISPKNKVPY.Y                |
| 3055 | - | 3065 | 677.3321 | 1352.6496 | 1352.6489 | 0.52    | 0 | 33 | 0.044    |   | W.ERAISPKNKVPY.Y + Phospho (ST) |
| 3055 | - | 3065 | 425.2343 | 1272.6809 | 1272.6826 | -1.31   | 0 | 38 | 0.008    |   | W.ERAISPKNKVPY.Y                |
| 3055 | - | 3065 | 637.3478 | 1272.6811 | 1272.6826 | -1.16   | 0 | 37 | 0.0093   |   | W.ERAISPKNKVPY.Y                |
| 3055 | - | 3065 | 637.3492 | 1272.6839 | 1272.6826 | 1.05    | 0 | 17 | 0.76     |   | W.ERAISPKNKVPY.Y                |



|      |   |      |          |           |           |        |   |    |        |                                 |
|------|---|------|----------|-----------|-----------|--------|---|----|--------|---------------------------------|
| 3055 | - | 3065 | 637.8506 | 1273.6866 | 1272.6826 | 789    | 0 | 32 | 0.029  | W.ERAISPKNKVPY.Y                |
| 3055 | - | 3065 | 677.3313 | 1352.648  | 1352.6489 | -0.65  | 0 | 32 | 0.051  | W.ERAISPKNKVPY.Y + Phospho (ST) |
| 3077 | - | 3084 | 485.7368 | 969.459   | 969.459   | 0.0041 | 0 | 16 | 2.8    | W.DHPKMTEL.Y                    |
| 3077 | - | 3084 | 493.7346 | 985.4546  | 985.4539  | 0.7    | 0 | 14 | 3.9    | W.DHPKMTEL.Y + Oxidation (M)    |
| 3077 | - | 3085 | 378.5146 | 1132.5221 | 1132.5223 | -0.14  | 1 | 21 | 0.83   | W.DHPKMTELY.Q                   |
| 3077 | - | 3085 | 567.2684 | 1132.5223 | 1132.5223 | 0.032  | 1 | 23 | 0.47   | W.DHPKMTELY.Q                   |
| 3077 | - | 3085 | 567.2686 | 1132.5227 | 1132.5223 | 0.35   | 1 | 21 | 0.65   | W.DHPKMTELY.Q                   |
| 3077 | - | 3085 | 575.2654 | 1148.5162 | 1148.5172 | -0.86  | 1 | 6  | 26     | W.DHPKMTELY.Q + Oxidation (M)   |
| 3077 | - | 3085 | 575.2657 | 1148.5168 | 1148.5172 | -0.33  | 1 | 4  | 34     | W.DHPKMTELY.Q + Oxidation (M)   |
| 3077 | - | 3085 | 575.2661 | 1148.5177 | 1148.5172 | 0.42   | 1 | 14 | 3.6    | W.DHPKMTELY.Q + Oxidation (M)   |
| 3077 | - | 3085 | 575.2665 | 1148.5184 | 1148.5172 | 1.05   | 1 | 13 | 4.3    | W.DHPKMTELY.Q + Oxidation (M)   |
| 3077 | - | 3084 | 485.7367 | 969.4588  | 969.459   | -0.12  | 0 | 28 | 0.18   | W.DHPKMTEL.Y                    |
| 3077 | - | 3084 | 493.7342 | 985.4538  | 985.4539  | -0.042 | 0 | 25 | 0.37   | W.DHPKMTEL.Y + Oxidation (M)    |
| 3077 | - | 3085 | 567.2682 | 1132.5219 | 1132.5223 | -0.29  | 1 | 23 | 0.45   | W.DHPKMTELY.Q                   |
| 3077 | - | 3085 | 378.5146 | 1132.5221 | 1132.5223 | -0.14  | 1 | 21 | 0.69   | W.DHPKMTELY.Q                   |
| 3077 | - | 3085 | 567.2687 | 1132.5228 | 1132.5223 | 0.46   | 1 | 20 | 0.91   | W.DHPKMTELY.Q                   |
| 3077 | - | 3085 | 575.2653 | 1148.5161 | 1148.5172 | -0.97  | 1 | 1  | 77     | W.DHPKMTELY.Q + Oxidation (M)   |
| 3077 | - | 3085 | 575.266  | 1148.5174 | 1148.5172 | 0.2    | 1 | 19 | 1.1    | W.DHPKMTELY.Q + Oxidation (M)   |
| 3077 | - | 3085 | 575.7678 | 1149.5211 | 1148.5172 | 874    | 1 | 1  | 60     | W.DHPKMTELY.Q + Oxidation (M)   |
| 3077 | - | 3084 | 485.737  | 969.4594  | 969.459   | 0.51   | 0 | 21 | 0.94   | W.DHPKMTEL.Y                    |
| 3077 | - | 3085 | 378.5145 | 1132.5217 | 1132.5223 | -0.55  | 1 | 0  | 84     | W.DHPKMTELY.Q                   |
| 3077 | - | 3085 | 567.2681 | 1132.5217 | 1132.5223 | -0.51  | 1 | 16 | 2      | W.DHPKMTELY.Q                   |
| 3077 | - | 3085 | 567.2687 | 1132.5229 | 1132.5223 | 0.57   | 1 | 26 | 0.23   | W.DHPKMTELY.Q                   |
| 3077 | - | 3085 | 383.846  | 1148.5163 | 1148.5172 | -0.79  | 1 | 0  | 85     | W.DHPKMTELY.Q + Oxidation (M)   |
| 3077 | - | 3085 | 575.2658 | 1148.5171 | 1148.5172 | -0.12  | 1 | 15 | 2.8    | W.DHPKMTELY.Q + Oxidation (M)   |
| 3077 | - | 3084 | 485.7365 | 969.4585  | 969.459   | -0.44  | 0 | 17 | 2.3    | W.DHPKMTEL.Y                    |
| 3077 | - | 3084 | 493.7344 | 985.4543  | 985.4539  | 0.39   | 0 | 4  | 42     | W.DHPKMTEL.Y + Oxidation (M)    |
| 3077 | - | 3085 | 567.2683 | 1132.5221 | 1132.5223 | -0.18  | 1 | 19 | 1      | W.DHPKMTELY.Q                   |
| 3077 | - | 3085 | 567.269  | 1132.5234 | 1132.5223 | 1      | 1 | 21 | 0.69   | W.DHPKMTELY.Q                   |
| 3077 | - | 3085 | 575.2661 | 1148.5176 | 1148.5172 | 0.31   | 1 | 2  | 52     | W.DHPKMTELY.Q + Oxidation (M)   |
| 3077 | - | 3085 | 575.2661 | 1148.5176 | 1148.5172 | 0.31   | 1 | 14 | 3.3    | W.DHPKMTELY.Q + Oxidation (M)   |
| 3077 | - | 3085 | 575.2662 | 1148.5178 | 1148.5172 | 0.52   | 1 | 6  | 25     | W.DHPKMTELY.Q + Oxidation (M)   |
| 3089 | - | 3096 | 474.7486 | 947.4826  | 947.4825  | 0.18   | 1 | 43 | 0.0037 | L.ADLNNVRF.S                    |
| 3089 | - | 3096 | 474.7486 | 947.4827  | 947.4825  | 0.25   | 1 | 48 | 0.0011 | L.ADLNNVRF.S                    |
| 3089 | - | 3096 | 474.7483 | 947.482   | 947.4825  | -0.53  | 1 | 40 | 0.0075 | L.ADLNNVRF.S                    |
| 3089 | - | 3096 | 474.7484 | 947.4823  | 947.4825  | -0.2   | 1 | 50 | 0.0008 | L.ADLNNVRF.S                    |
| 3092 | - | 3096 | 325.1745 | 648.3344  | 648.3344  | 0.054  | 0 | 27 | 0.18   | L.NNVRF.S                       |
| 3092 | - | 3096 | 325.1746 | 648.3346  | 648.3344  | 0.34   | 0 | 27 | 0.13   | L.NNVRF.S                       |

|      |   |      |          |           |           |        |   |    |          |                                   |
|------|---|------|----------|-----------|-----------|--------|---|----|----------|-----------------------------------|
| 3092 | - | 3096 | 325.1744 | 648.3343  | 648.3344  | -0.042 | 0 | 27 | 0.19     | L.NNVRF.S                         |
| 3092 | - | 3096 | 325.1746 | 648.3346  | 648.3344  | 0.34   | 0 | 28 | 0.12     | L.NNVRF.S                         |
| 3100 | - | 3105 | 368.2128 | 734.411   | 734.4109  | 0.24   | 0 | 18 | 1        | Y.RTAMKL.R + Oxidation (M)        |
| 3100 | - | 3105 | 368.2126 | 734.4107  | 734.4109  | -0.26  | 0 | 9  | 8        | Y.RTAMKL.R + Oxidation (M)        |
| 3127 | - | 3141 | 603.6248 | 1807.8524 | 1807.8523 | 0.089  | 1 | 43 | 0.0035   | U L.DQHNLKQNDQPM DIL.Q            |
| 3127 | - | 3141 | 603.625  | 1807.8532 | 1807.8523 | 0.49   | 1 | 33 | 0.041    | U L.DQHNLKQNDQPM DIL.Q            |
| 3127 | - | 3141 | 603.6246 | 1807.8519 | 1807.8523 | -0.22  | 1 | 15 | 2.3      | U L.DQHNLKQNDQPM DIL.Q            |
| 3127 | - | 3141 | 603.625  | 1807.8532 | 1807.8523 | 0.49   | 1 | 41 | 0.0067   | U L.DQHNLKQNDQPM DIL.Q            |
| 3132 | - | 3141 | 601.2983 | 1200.582  | 1200.5809 | 0.96   | 0 | 39 | 0.0088   | U L.KQNDQPM DIL.Q                 |
| 3132 | - | 3141 | 609.295  | 1216.5755 | 1216.5758 | -0.2   | 0 | 32 | 0.045    | U L.KQNDQPM DIL.Q + Oxidation (M) |
| 3132 | - | 3141 | 601.2982 | 1200.5819 | 1200.5809 | 0.86   | 0 | 30 | 0.078    | U L.KQNDQPM DIL.Q                 |
| 3132 | - | 3141 | 609.2955 | 1216.5764 | 1216.5758 | 0.51   | 0 | 50 | 0.00073  | U L.KQNDQPM DIL.Q + Oxidation (M) |
| 3132 | - | 3141 | 601.2975 | 1200.5804 | 1200.5809 | -0.36  | 0 | 42 | 0.0045   | U L.KQNDQPM DIL.Q                 |
| 3132 | - | 3141 | 609.2953 | 1216.5761 | 1216.5758 | 0.3    | 0 | 33 | 0.038    | U L.KQNDQPM DIL.Q + Oxidation (M) |
| 3132 | - | 3141 | 601.2977 | 1200.5808 | 1200.5809 | -0.06  | 0 | 40 | 0.0081   | U L.KQNDQPM DIL.Q                 |
| 3132 | - | 3141 | 609.2955 | 1216.5765 | 1216.5758 | 0.61   | 0 | 40 | 0.0085   | U L.KQNDQPM DIL.Q + Oxidation (M) |
| 3148 | - | 3154 | 441.2395 | 880.4644  | 880.4654  | -1.17  | 1 | 35 | 0.02     | U L.TTIYDRL.E                     |
| 3148 | - | 3154 | 441.2401 | 880.4656  | 880.4654  | 0.21   | 1 | 43 | 0.0033   | U L.TTIYDRL.E                     |
| 3148 | - | 3154 | 441.24   | 880.4654  | 880.4654  | -0.064 | 1 | 34 | 0.023    | U L.TTIYDRL.E                     |
| 3148 | - | 3154 | 441.2399 | 880.4653  | 880.4654  | -0.13  | 1 | 28 | 0.11     | U L.TTIYDRL.E                     |
| 3152 | - | 3161 | 634.3059 | 1266.5973 | 1266.5952 | 1.59   | 1 | 24 | 0.41     | U Y.DRLEQEHN NL.V                 |
| 3152 | - | 3161 | 423.2065 | 1266.5977 | 1266.5952 | 1.94   | 1 | 44 | 0.0042   | U Y.DRLEQEHN NL.V                 |
| 3152 | - | 3161 | 423.2058 | 1266.5957 | 1266.5952 | 0.36   | 1 | 34 | 0.042    | U Y.DRLEQEHN NL.V                 |
| 3152 | - | 3161 | 634.3054 | 1266.5962 | 1266.5952 | 0.73   | 1 | 19 | 1        | U Y.DRLEQEHN NL.V                 |
| 3152 | - | 3161 | 423.5403 | 1267.5991 | 1266.5952 | 793    | 1 | 7  | 19       | U Y.DRLEQEHN NL.V                 |
| 3152 | - | 3161 | 634.807  | 1267.5995 | 1266.5952 | 793    | 1 | 13 | 4.2      | U Y.DRLEQEHN NL.V                 |
| 3152 | - | 3161 | 423.2054 | 1266.5944 | 1266.5952 | -0.66  | 1 | 19 | 1.2      | U Y.DRLEQEHN NL.V                 |
| 3152 | - | 3161 | 634.3055 | 1266.5964 | 1266.5952 | 0.92   | 1 | 28 | 0.17     | U Y.DRLEQEHN NL.V                 |
| 3152 | - | 3161 | 634.3056 | 1266.5967 | 1266.5952 | 1.11   | 1 | 23 | 0.46     | U Y.DRLEQEHN NL.V                 |
| 3152 | - | 3161 | 423.2065 | 1266.5976 | 1266.5952 | 1.87   | 1 | 32 | 0.069    | U Y.DRLEQEHN NL.V                 |
| 3155 | - | 3166 | 703.3573 | 1404.7    | 1404.6997 | 0.23   | 1 | 62 | 4.20E-05 | U L.EQEHN NLVNVPL.C               |
| 3155 | - | 3166 | 703.3571 | 1404.6996 | 1404.6997 | -0.12  | 1 | 62 | 4.30E-05 | U L.EQEHN NLVNVPL.C               |
| 3155 | - | 3166 | 703.3588 | 1404.703  | 1404.6997 | 2.32   | 1 | 62 | 4.30E-05 | U L.EQEHN NLVNVPL.C               |
| 3155 | - | 3166 | 703.3576 | 1404.7007 | 1404.6997 | 0.67   | 1 | 43 | 0.0032   | U L.EQEHN NLVNVPL.C               |
| 3180 | - | 3190 | 622.3652 | 1242.7158 | 1242.7157 | 0.1    | 0 | 9  | 3        | U Y.DTGRTGRIRVL.S                 |
| 3180 | - | 3190 | 415.2459 | 1242.7158 | 1242.7157 | 0.12   | 0 | 4  | 8.3      | U Y.DTGRTGRIRVL.S                 |
| 3180 | - | 3190 | 415.2458 | 1242.7155 | 1242.7157 | -0.1   | 0 | 3  | 12       | U Y.DTGRTGRIRVL.S                 |
| 3180 | - | 3190 | 622.3648 | 1242.7151 | 1242.7157 | -0.49  | 0 | 1  | 18       | U Y.DTGRTGRIRVL.S                 |

|      |   |      |          |           |           |         |   |    |          |   |                                 |
|------|---|------|----------|-----------|-----------|---------|---|----|----------|---|---------------------------------|
| 3191 | - | 3199 | 483.2867 | 964.5589  | 964.5593  | -0.47   | 1 | 49 | 0.00027  | U | L.SFKTGIISL.C                   |
| 3191 | - | 3199 | 483.287  | 964.5594  | 964.5593  | 0.1     | 1 | 35 | 0.0061   | U | L.SFKTGIISL.C                   |
| 3191 | - | 3199 | 483.2872 | 964.5599  | 964.5593  | 0.54    | 1 | 38 | 0.0035   | U | L.SFKTGIISL.C                   |
| 3191 | - | 3199 | 483.2867 | 964.5588  | 964.5593  | -0.53   | 1 | 39 | 0.0028   | U | L.SFKTGIISL.C                   |
| 3193 | - | 3199 | 366.2369 | 730.4592  | 730.4589  | 0.44    | 0 | 40 | 0.0038   | U | F.KTGIISL.C                     |
| 3193 | - | 3199 | 366.2364 | 730.4582  | 730.4589  | -0.97   | 0 | 43 | 0.0017   | U | F.KTGIISL.C                     |
| 3193 | - | 3199 | 366.2367 | 730.4588  | 730.4589  | -0.14   | 0 | 39 | 0.0047   | U | F.KTGIISL.C                     |
| 3193 | - | 3199 | 366.2367 | 730.4588  | 730.4589  | -0.057  | 0 | 34 | 0.013    | U | F.KTGIISL.C                     |
| 3193 | - | 3204 | 455.2435 | 1362.7086 | 1362.7094 | -0.62   | 1 | 1  | 46       | U | F.KTGIISLCKAHL.E + Phospho (ST) |
| 3212 | - | 3221 | 536.2773 | 1070.54   | 1070.5397 | 0.32    | 1 | 30 | 0.07     | U | L.FKQVASSTGF.C                  |
| 3212 | - | 3221 | 536.2766 | 1070.5387 | 1070.5397 | -0.94   | 1 | 17 | 1.2      | U | L.FKQVASSTGF.C                  |
| 3212 | - | 3221 | 536.2775 | 1070.5405 | 1070.5397 | 0.77    | 1 | 34 | 0.026    | U | L.FKQVASSTGF.C                  |
| 3212 | - | 3221 | 536.2769 | 1070.5393 | 1070.5397 | -0.37   | 1 | 32 | 0.043    | U | L.FKQVASSTGF.C                  |
| 3213 | - | 3221 | 462.7427 | 923.4709  | 923.4713  | -0.36   | 0 | 46 | 0.0021   | U | F.KQVASSTGF.C                   |
| 3213 | - | 3221 | 462.7431 | 923.4717  | 923.4713  | 0.44    | 0 | 63 | 4.10E-05 | U | F.KQVASSTGF.C                   |
| 3213 | - | 3227 | 566.2936 | 1695.8591 | 1694.8522 | 594     | 1 | 2  | 37       | U | F.KQVASSTGFCDQRRL.G             |
| 3213 | - | 3221 | 462.7428 | 923.471   | 923.4713  | -0.29   | 0 | 55 | 0.00025  | U | F.KQVASSTGF.C                   |
| 3213 | - | 3221 | 462.7431 | 923.4717  | 923.4713  | 0.5     | 0 | 37 | 0.013    | U | F.KQVASSTGF.C                   |
| 3213 | - | 3221 | 462.7432 | 923.4718  | 923.4713  | 0.63    | 0 | 62 | 4.50E-05 | U | F.KQVASSTGF.C                   |
| 3213 | - | 3221 | 462.7431 | 923.4716  | 923.4713  | 0.37    | 0 | 50 | 0.00068  | U | F.KQVASSTGF.C                   |
| 3213 | - | 3221 | 462.7432 | 923.4718  | 923.4713  | 0.63    | 0 | 65 | 2.30E-05 | U | F.KQVASSTGF.C                   |
| 3213 | - | 3221 | 462.743  | 923.4715  | 923.4713  | 0.24    | 0 | 55 | 0.00026  | U | F.KQVASSTGF.C                   |
| 3213 | - | 3221 | 462.7437 | 923.4729  | 923.4713  | 1.76    | 0 | 56 | 0.00018  | U | F.KQVASSTGF.C                   |
| 3222 | - | 3229 | 480.756  | 959.4975  | 959.4971  | 0.42    | 1 | 5  | 23       | U | F.CDQRRLGL.L                    |
| 3231 | - | 3241 | 440.5855 | 1318.7346 | 1318.7357 | -0.84   | 1 | 31 | 0.025    | U | L.LHDSIQIPRQL.G                 |
| 3231 | - | 3241 | 660.3765 | 1318.7384 | 1318.7357 | 2.02    | 1 | 54 | 0.00012  | U | L.LHDSIQIPRQL.G                 |
| 3231 | - | 3241 | 660.3751 | 1318.7356 | 1318.7357 | -0.11   | 1 | 54 | 0.00011  | U | L.LHDSIQIPRQL.G                 |
| 3231 | - | 3241 | 440.5858 | 1318.7357 | 1318.7357 | -0.0061 | 1 | 30 | 0.032    | U | L.LHDSIQIPRQL.G                 |
| 3231 | - | 3241 | 660.3742 | 1318.7339 | 1318.7357 | -1.41   | 1 | 54 | 0.00012  | U | L.LHDSIQIPRQL.G                 |
| 3231 | - | 3241 | 440.5856 | 1318.7349 | 1318.7357 | -0.63   | 1 | 27 | 0.069    | U | L.LHDSIQIPRQL.G                 |
| 3231 | - | 3241 | 440.5859 | 1318.7358 | 1318.7357 | 0.062   | 1 | 23 | 0.17     | U | L.LHDSIQIPRQL.G                 |
| 3231 | - | 3241 | 660.3757 | 1318.7368 | 1318.7357 | 0.81    | 1 | 39 | 0.0037   | U | L.LHDSIQIPRQL.G                 |
| 3232 | - | 3241 | 402.8908 | 1205.6506 | 1205.6517 | -0.88   | 0 | 28 | 0.07     | U | L.HDSIQIPRQL.G                  |
| 3232 | - | 3241 | 603.8334 | 1205.6522 | 1205.6517 | 0.45    | 0 | 52 | 0.0003   | U | L.HDSIQIPRQL.G                  |
| 3232 | - | 3247 | 599.6478 | 1795.9217 | 1795.9217 | -0.022  | 1 | 25 | 0.14     | U | L.HDSIQIPRQLGEVASF.G            |
| 3232 | - | 3247 | 898.9683 | 1795.922  | 1795.9217 | 0.16    | 1 | 47 | 0.00098  | U | L.HDSIQIPRQLGEVASF.G            |
| 3232 | - | 3241 | 402.8912 | 1205.6517 | 1205.6517 | 0.031   | 0 | 23 | 0.24     | U | L.HDSIQIPRQL.G                  |
| 3232 | - | 3241 | 603.8334 | 1205.6523 | 1205.6517 | 0.55    | 0 | 51 | 0.00031  | U | L.HDSIQIPRQL.G                  |

|      |   |      |          |           |           |         |   |    |         |   |                                  |
|------|---|------|----------|-----------|-----------|---------|---|----|---------|---|----------------------------------|
| 3232 | - | 3247 | 898.9672 | 1795.9199 | 1795.9217 | -1      | 1 | 52 | 0.00033 | U | L.HDSIQIPRQLGEVASF.G             |
| 3232 | - | 3247 | 599.6483 | 1795.9231 | 1795.9217 | 0.79    | 1 | 23 | 0.26    | U | L.HDSIQIPRQLGEVASF.G             |
| 3232 | - | 3247 | 599.9802 | 1796.9188 | 1795.9217 | 555     | 1 | 26 | 0.12    | U | L.HDSIQIPRQLGEVASF.G             |
| 3232 | - | 3241 | 402.891  | 1205.6512 | 1205.6517 | -0.35   | 0 | 28 | 0.074   | U | L.HDSIQIPRQL.G                   |
| 3232 | - | 3241 | 603.8329 | 1205.6513 | 1205.6517 | -0.26   | 0 | 56 | 0.00013 | U | L.HDSIQIPRQL.G                   |
| 3232 | - | 3247 | 599.6473 | 1795.92   | 1795.9217 | -0.94   | 1 | 24 | 0.22    | U | L.HDSIQIPRQLGEVASF.G             |
| 3232 | - | 3247 | 898.9697 | 1795.9249 | 1795.9217 | 1.79    | 1 | 40 | 0.0043  | U | L.HDSIQIPRQLGEVASF.G             |
| 3232 | - | 3241 | 603.8324 | 1205.6502 | 1205.6517 | -1.17   | 0 | 56 | 0.00011 | U | L.HDSIQIPRQL.G                   |
| 3232 | - | 3241 | 402.8912 | 1205.6517 | 1205.6517 | 0.031   | 0 | 26 | 0.13    | U | L.HDSIQIPRQL.G                   |
| 3232 | - | 3247 | 898.9679 | 1795.9212 | 1795.9217 | -0.25   | 1 | 54 | 0.00019 | U | L.HDSIQIPRQLGEVASF.G             |
| 3232 | - | 3247 | 599.6483 | 1795.9231 | 1795.9217 | 0.79    | 1 | 34 | 0.021   | U | L.HDSIQIPRQLGEVASF.G             |
| 3248 | - | 3260 | 676.8154 | 1351.6162 | 1351.619  | -2.12   | 0 | 15 | 2.5     |   | F.GGSNIEPSVRSCF.Q                |
| 3248 | - | 3260 | 676.8173 | 1351.6201 | 1351.619  | 0.77    | 0 | 27 | 0.17    |   | F.GGSNIEPSVRSCF.Q                |
| 3248 | - | 3260 | 676.817  | 1351.6194 | 1351.619  | 0.23    | 0 | 43 | 0.0041  |   | F.GGSNIEPSVRSCF.Q                |
| 3248 | - | 3260 | 676.8152 | 1351.6158 | 1351.619  | -2.39   | 0 | 32 | 0.056   |   | F.GGSNIEPSVRSCF.Q                |
| 3248 | - | 3260 | 676.8162 | 1351.6179 | 1351.619  | -0.85   | 0 | 41 | 0.0061  |   | F.GGSNIEPSVRSCF.Q                |
| 3261 | - | 3273 | 722.8749 | 1443.7352 | 1443.7357 | -0.38   | 1 | 15 | 1.9     | U | F.QFANNKPEIEAAL.F                |
| 3261 | - | 3273 | 722.8749 | 1443.7353 | 1443.7357 | -0.29   | 1 | 8  | 11      | U | F.QFANNKPEIEAAL.F                |
| 3261 | - | 3273 | 722.8754 | 1443.7362 | 1443.7357 | 0.3     | 1 | 10 | 6       | U | F.QFANNKPEIEAAL.F                |
| 3263 | - | 3273 | 585.3116 | 1168.6087 | 1168.6087 | -0.0077 | 0 | 56 | 0.00014 | U | F.ANNKPEIEAAL.F                  |
| 3263 | - | 3274 | 658.8459 | 1315.6773 | 1315.6772 | 0.13    | 1 | 12 | 3.5     | U | F.ANNKPEIEAALF.L                 |
| 3263 | - | 3274 | 658.846  | 1315.6775 | 1315.6772 | 0.22    | 1 | 42 | 0.0035  | U | F.ANNKPEIEAALF.L                 |
| 3263 | - | 3273 | 585.3116 | 1168.6087 | 1168.6087 | -0.0077 | 0 | 29 | 0.073   | U | F.ANNKPEIEAAL.F                  |
| 3263 | - | 3274 | 658.8459 | 1315.6773 | 1315.6772 | 0.13    | 1 | 34 | 0.026   | U | F.ANNKPEIEAALF.L                 |
| 3263 | - | 3273 | 585.3125 | 1168.6104 | 1168.6087 | 1.45    | 0 | 46 | 0.0012  | U | F.ANNKPEIEAAL.F                  |
| 3263 | - | 3274 | 658.8458 | 1315.677  | 1315.6772 | -0.15   | 1 | 37 | 0.013   | U | F.ANNKPEIEAALF.L                 |
| 3278 | - | 3287 | 638.8127 | 1275.6109 | 1275.6104 | 0.43    | 1 | 26 | 0.19    | U | W.MRLEPQSMVW.L                   |
| 3278 | - | 3287 | 646.81   | 1291.6054 | 1291.6053 | 0.11    | 1 | 30 | 0.081   | U | W.MRLEPQSMVW.L + Oxidation (M)   |
| 3278 | - | 3287 | 646.8112 | 1291.6078 | 1291.6053 | 1.91    | 1 | 34 | 0.031   | U | W.MRLEPQSMVW.L + Oxidation (M)   |
| 3278 | - | 3287 | 654.8066 | 1307.5987 | 1307.6002 | -1.14   | 1 | 28 | 0.12    | U | W.MRLEPQSMVW.L + 2 Oxidation (M) |
| 3278 | - | 3287 | 638.8132 | 1275.6118 | 1275.6104 | 1.1     | 1 | 29 | 0.1     | U | W.MRLEPQSMVW.L                   |
| 3278 | - | 3287 | 646.8101 | 1291.6057 | 1291.6053 | 0.3     | 1 | 37 | 0.014   | U | W.MRLEPQSMVW.L + Oxidation (M)   |
| 3278 | - | 3287 | 646.8103 | 1291.6061 | 1291.6053 | 0.58    | 1 | 34 | 0.034   | U | W.MRLEPQSMVW.L + Oxidation (M)   |
| 3278 | - | 3287 | 654.8074 | 1307.6003 | 1307.6002 | 0.073   | 1 | 34 | 0.032   | U | W.MRLEPQSMVW.L + 2 Oxidation (M) |
| 3278 | - | 3287 | 638.81   | 1275.6054 | 1275.6104 | -3.87   | 1 | 20 | 0.82    | U | W.MRLEPQSMVW.L                   |
| 3278 | - | 3287 | 638.8124 | 1275.6103 | 1275.6104 | -0.044  | 1 | 19 | 0.89    | U | W.MRLEPQSMVW.L                   |
| 3278 | - | 3287 | 646.8094 | 1291.6043 | 1291.6053 | -0.74   | 1 | 9  | 9.9     | U | W.MRLEPQSMVW.L + Oxidation (M)   |
| 3278 | - | 3287 | 646.811  | 1291.6075 | 1291.6053 | 1.72    | 1 | 14 | 3.1     | U | W.MRLEPQSMVW.L + Oxidation (M)   |

|      |   |      |          |           |           |        |   |    |          |   |                                  |
|------|---|------|----------|-----------|-----------|--------|---|----|----------|---|----------------------------------|
| 3278 | - | 3287 | 654.8075 | 1307.6004 | 1307.6002 | 0.17   | 1 | 23 | 0.43     | U | W.MRLEPQSMVW.L + 2 Oxidation (M) |
| 3278 | - | 3287 | 638.81   | 1275.6054 | 1275.6104 | -3.87  | 1 | 20 | 0.8      | U | W.MRLEPQSMVW.L                   |
| 3278 | - | 3287 | 638.8129 | 1275.6112 | 1275.6104 | 0.63   | 1 | 27 | 0.14     | U | W.MRLEPQSMVW.L                   |
| 3278 | - | 3287 | 646.8094 | 1291.6042 | 1291.6053 | -0.84  | 1 | 17 | 1.9      | U | W.MRLEPQSMVW.L + Oxidation (M)   |
| 3278 | - | 3287 | 646.8097 | 1291.6048 | 1291.6053 | -0.36  | 1 | 33 | 0.043    | U | W.MRLEPQSMVW.L + Oxidation (M)   |
| 3278 | - | 3287 | 654.8083 | 1307.602  | 1307.6002 | 1.38   | 1 | 25 | 0.24     | U | W.MRLEPQSMVW.L + 2 Oxidation (M) |
| 3323 | - | 3327 | 354.6768 | 707.339   | 707.3391  | -0.1   | 1 | 7  | 8.1      |   | L.KHFNY.D                        |
| 3323 | - | 3327 | 354.6766 | 707.3387  | 707.3391  | -0.53  | 1 | 8  | 9        |   | L.KHFNY.D                        |
| 3323 | - | 3327 | 354.6766 | 707.3387  | 707.3391  | -0.62  | 1 | 9  | 7.2      |   | L.KHFNY.D                        |
| 3323 | - | 3327 | 354.6765 | 707.3385  | 707.3391  | -0.79  | 1 | 6  | 14       |   | L.KHFNY.D                        |
| 3353 | - | 3365 | 714.3084 | 1426.6021 | 1426.6035 | -0.94  | 0 | 88 | 1.50E-07 | U | Y.CTPTTSGEDVRDFA                 |
| 3353 | - | 3365 | 714.3077 | 1426.6009 | 1426.6035 | -1.79  | 0 | 43 | 0.0042   | U | Y.CTPTTSGEDVRDFA                 |
| 3353 | - | 3365 | 714.8101 | 1427.6056 | 1426.6035 | 702    | 0 | 25 | 0.33     | U | Y.CTPTTSGEDVRDFA                 |
| 3353 | - | 3365 | 714.3087 | 1426.6028 | 1426.6035 | -0.51  | 0 | 88 | 1.50E-07 | U | Y.CTPTTSGEDVRDFA                 |
| 3374 | - | 3378 | 362.2161 | 722.4177  | 722.4187  | -1.43  | 0 | 2  | 14       | U | F.RTKRY.F                        |
| 3374 | - | 3378 | 362.2166 | 722.4186  | 722.4187  | -0.16  | 0 | 3  | 12       | U | F.RTKRY.F                        |
| 3374 | - | 3378 | 362.2166 | 722.4187  | 722.4187  | 0.0055 | 0 | 3  | 13       | U | F.RTKRY.F                        |
| 3379 | - | 3387 | 369.5236 | 1105.5489 | 1105.5491 | -0.23  | 1 | 19 | 1.1      | U | Y.FAKHPRMGY.L                    |
| 3379 | - | 3387 | 369.5236 | 1105.5489 | 1105.5491 | -0.23  | 1 | 27 | 0.15     | U | Y.FAKHPRMGY.L                    |
| 3379 | - | 3387 | 553.7821 | 1105.5497 | 1105.5491 | 0.5    | 1 | 20 | 0.71     | U | Y.FAKHPRMGY.L                    |
| 3379 | - | 3387 | 553.7822 | 1105.5499 | 1105.5491 | 0.72   | 1 | 33 | 0.03     | U | Y.FAKHPRMGY.L                    |
| 3379 | - | 3387 | 369.524  | 1105.5501 | 1105.5491 | 0.93   | 1 | 27 | 0.12     | U | Y.FAKHPRMGY.L                    |
| 3379 | - | 3387 | 553.7823 | 1105.5501 | 1105.5491 | 0.94   | 1 | 37 | 0.014    | U | Y.FAKHPRMGY.L                    |
| 3379 | - | 3387 | 374.8547 | 1121.5423 | 1121.544  | -1.54  | 1 | 24 | 0.35     | U | Y.FAKHPRMGY.L + Oxidation (M)    |
| 3379 | - | 3387 | 374.8551 | 1121.5434 | 1121.544  | -0.57  | 1 | 8  | 13       | U | Y.FAKHPRMGY.L + Oxidation (M)    |
| 3379 | - | 3387 | 374.8554 | 1121.5443 | 1121.544  | 0.25   | 1 | 6  | 21       | U | Y.FAKHPRMGY.L + Oxidation (M)    |
| 3379 | - | 3387 | 553.7818 | 1105.549  | 1105.5491 | -0.052 | 1 | 18 | 1.2      | U | Y.FAKHPRMGY.L                    |
| 3379 | - | 3387 | 553.7819 | 1105.5493 | 1105.5491 | 0.17   | 1 | 36 | 0.017    | U | Y.FAKHPRMGY.L                    |
| 3379 | - | 3387 | 369.5237 | 1105.5493 | 1105.5491 | 0.19   | 1 | 19 | 0.88     | U | Y.FAKHPRMGY.L                    |
| 3379 | - | 3387 | 369.5239 | 1105.5498 | 1105.5491 | 0.6    | 1 | 30 | 0.073    | U | Y.FAKHPRMGY.L                    |
| 3379 | - | 3387 | 369.5239 | 1105.5499 | 1105.5491 | 0.68   | 1 | 12 | 4.5      | U | Y.FAKHPRMGY.L                    |
| 3379 | - | 3387 | 553.7823 | 1105.5501 | 1105.5491 | 0.94   | 1 | 33 | 0.031    | U | Y.FAKHPRMGY.L                    |
| 3379 | - | 3387 | 374.8553 | 1121.5441 | 1121.544  | 0.087  | 1 | 7  | 14       | U | Y.FAKHPRMGY.L + Oxidation (M)    |
| 3379 | - | 3387 | 369.5235 | 1105.5486 | 1105.5491 | -0.48  | 1 | 19 | 1        | U | Y.FAKHPRMGY.L                    |
| 3379 | - | 3387 | 369.5235 | 1105.5487 | 1105.5491 | -0.39  | 1 | 9  | 9        | U | Y.FAKHPRMGY.L                    |
| 3379 | - | 3387 | 553.782  | 1105.5494 | 1105.5491 | 0.28   | 1 | 36 | 0.018    | U | Y.FAKHPRMGY.L                    |
| 3379 | - | 3387 | 553.7821 | 1105.5497 | 1105.5491 | 0.5    | 1 | 25 | 0.23     | U | Y.FAKHPRMGY.L                    |
| 3379 | - | 3387 | 554.2841 | 1106.5537 | 1105.5491 | 909    | 1 | 23 | 0.33     | U | Y.FAKHPRMGY.L                    |

|      |   |      |          |           |           |        |   |    |       |   |                               |
|------|---|------|----------|-----------|-----------|--------|---|----|-------|---|-------------------------------|
| 3379 | - | 3387 | 374.8548 | 1121.5426 | 1121.544  | -1.3   | 1 | 12 | 5.3   | U | Y.FAKHPRMGY.L + Oxidation (M) |
| 3379 | - | 3387 | 369.5232 | 1105.5477 | 1105.5491 | -1.3   | 1 | 17 | 1.6   | U | Y.FAKHPRMGY.L                 |
| 3379 | - | 3387 | 369.5235 | 1105.5487 | 1105.5491 | -0.39  | 1 | 18 | 1.1   | U | Y.FAKHPRMGY.L                 |
| 3379 | - | 3387 | 553.7819 | 1105.5493 | 1105.5491 | 0.17   | 1 | 33 | 0.033 | U | Y.FAKHPRMGY.L                 |
| 3379 | - | 3387 | 553.7824 | 1105.5503 | 1105.5491 | 1.05   | 1 | 36 | 0.016 | U | Y.FAKHPRMGY.L                 |
| 3379 | - | 3387 | 369.858  | 1106.5521 | 1105.5491 | 907    | 1 | 13 | 3.6   | U | Y.FAKHPRMGY.L                 |
| 3379 | - | 3387 | 374.8554 | 1121.5443 | 1121.544  | 0.25   | 1 | 21 | 0.62  | U | Y.FAKHPRMGY.L + Oxidation (M) |
| 3380 | - | 3387 | 480.2475 | 958.4804  | 958.4807  | -0.25  | 0 | 6  | 13    | U | F.AKHPRMGY.L                  |
| 3380 | - | 3387 | 320.5008 | 958.4806  | 958.4807  | -0.14  | 0 | 3  | 27    | U | F.AKHPRMGY.L                  |
| 3380 | - | 3387 | 320.5008 | 958.4806  | 958.4807  | -0.04  | 0 | 8  | 9.6   | U | F.AKHPRMGY.L                  |
| 3380 | - | 3387 | 480.2477 | 958.4807  | 958.4807  | 0.069  | 0 | 19 | 0.68  | U | F.AKHPRMGY.L                  |
| 3380 | - | 3387 | 480.2477 | 958.4809  | 958.4807  | 0.26   | 0 | 14 | 2.3   | U | F.AKHPRMGY.L                  |
| 3380 | - | 3387 | 480.2477 | 958.4809  | 958.4807  | 0.26   | 0 | 16 | 1.4   | U | F.AKHPRMGY.L                  |
| 3380 | - | 3387 | 480.2478 | 958.481   | 958.4807  | 0.32   | 0 | 25 | 0.16  | U | F.AKHPRMGY.L                  |
| 3380 | - | 3387 | 320.5009 | 958.481   | 958.4807  | 0.34   | 0 | 10 | 5.8   | U | F.AKHPRMGY.L                  |
| 3380 | - | 3387 | 320.5009 | 958.481   | 958.4807  | 0.34   | 0 | 12 | 3.5   | U | F.AKHPRMGY.L                  |
| 3380 | - | 3387 | 480.2481 | 958.4816  | 958.4807  | 0.96   | 0 | 14 | 2.2   | U | F.AKHPRMGY.L                  |
| 3380 | - | 3387 | 320.5012 | 958.4817  | 958.4807  | 1.01   | 0 | 4  | 20    | U | F.AKHPRMGY.L                  |
| 3380 | - | 3387 | 488.245  | 974.4755  | 974.4756  | -0.1   | 0 | 13 | 3     | U | F.AKHPRMGY.L + Oxidation (M)  |
| 3380 | - | 3387 | 325.8325 | 974.4755  | 974.4756  | -0.056 | 0 | 8  | 9.5   | U | F.AKHPRMGY.L + Oxidation (M)  |
| 3380 | - | 3387 | 488.2455 | 974.4765  | 974.4756  | 0.96   | 0 | 0  | 57    | U | F.AKHPRMGY.L + Oxidation (M)  |
| 3380 | - | 3387 | 480.2471 | 958.4797  | 958.4807  | -1.01  | 0 | 1  | 46    | U | F.AKHPRMGY.L                  |
| 3380 | - | 3387 | 480.2474 | 958.4803  | 958.4807  | -0.38  | 0 | 25 | 0.16  | U | F.AKHPRMGY.L                  |
| 3380 | - | 3387 | 320.5007 | 958.4804  | 958.4807  | -0.33  | 0 | 7  | 12    | U | F.AKHPRMGY.L                  |
| 3380 | - | 3387 | 480.2475 | 958.4805  | 958.4807  | -0.19  | 0 | 13 | 2.5   | U | F.AKHPRMGY.L                  |
| 3380 | - | 3387 | 480.2475 | 958.4805  | 958.4807  | -0.19  | 0 | 9  | 6.9   | U | F.AKHPRMGY.L                  |
| 3380 | - | 3387 | 320.5009 | 958.4809  | 958.4807  | 0.25   | 0 | 10 | 5.5   | U | F.AKHPRMGY.L                  |
| 3380 | - | 3387 | 320.501  | 958.4813  | 958.4807  | 0.63   | 0 | 5  | 19    | U | F.AKHPRMGY.L                  |
| 3380 | - | 3387 | 480.248  | 958.4814  | 958.4807  | 0.71   | 0 | 8  | 8.3   | U | F.AKHPRMGY.L                  |
| 3380 | - | 3387 | 320.5011 | 958.4816  | 958.4807  | 0.91   | 0 | 8  | 8.3   | U | F.AKHPRMGY.L                  |
| 3380 | - | 3387 | 480.7484 | 959.4822  | 958.4807  | 1045   | 0 | 13 | 2.9   | U | F.AKHPRMGY.L                  |
| 3380 | - | 3387 | 480.7486 | 959.4826  | 958.4807  | 1045   | 0 | 25 | 0.17  | U | F.AKHPRMGY.L                  |
| 3380 | - | 3387 | 480.7491 | 959.4837  | 958.4807  | 1046   | 0 | 11 | 4.3   | U | F.AKHPRMGY.L                  |
| 3380 | - | 3387 | 320.8358 | 959.4854  | 958.4807  | 1048   | 0 | 7  | 10    | U | F.AKHPRMGY.L                  |
| 3380 | - | 3387 | 488.2451 | 974.4756  | 974.4756  | -0.042 | 0 | 24 | 0.28  | U | F.AKHPRMGY.L + Oxidation (M)  |
| 3380 | - | 3387 | 325.8325 | 974.4756  | 974.4756  | 0.039  | 0 | 12 | 3.6   | U | F.AKHPRMGY.L + Oxidation (M)  |
| 3380 | - | 3387 | 480.2472 | 958.4799  | 958.4807  | -0.82  | 0 | 4  | 21    | U | F.AKHPRMGY.L                  |
| 3380 | - | 3387 | 480.2473 | 958.4801  | 958.4807  | -0.63  | 0 | 13 | 2.6   | U | F.AKHPRMGY.L                  |



|      |   |      |           |           |           |        |   |    |         |   |                                       |
|------|---|------|-----------|-----------|-----------|--------|---|----|---------|---|---------------------------------------|
| 3380 | - | 3387 | 320.5007  | 958.4802  | 958.4807  | -0.52  | 0 | 6  | 16      | U | F.AKHPRMGY.L                          |
| 3380 | - | 3387 | 320.5008  | 958.4805  | 958.4807  | -0.23  | 0 | 5  | 18      | U | F.AKHPRMGY.L                          |
| 3380 | - | 3387 | 480.2476  | 958.4806  | 958.4807  | -0.058 | 0 | 2  | 34      | U | F.AKHPRMGY.L                          |
| 3380 | - | 3387 | 480.2477  | 958.4808  | 958.4807  | 0.13   | 0 | 11 | 4.1     | U | F.AKHPRMGY.L                          |
| 3380 | - | 3387 | 320.5009  | 958.481   | 958.4807  | 0.34   | 0 | 13 | 2.5     | U | F.AKHPRMGY.L                          |
| 3380 | - | 3387 | 480.248   | 958.4814  | 958.4807  | 0.71   | 0 | 29 | 0.072   | U | F.AKHPRMGY.L                          |
| 3380 | - | 3387 | 480.7493  | 959.484   | 958.4807  | 1047   | 0 | 9  | 6.8     | U | F.AKHPRMGY.L                          |
| 3380 | - | 3387 | 480.75    | 959.4854  | 958.4807  | 1048   | 0 | 8  | 8.7     | U | F.AKHPRMGY.L                          |
| 3380 | - | 3387 | 480.7503  | 959.4861  | 958.4807  | 1049   | 0 | 6  | 14      | U | F.AKHPRMGY.L                          |
| 3380 | - | 3387 | 488.2445  | 974.4745  | 974.4756  | -1.17  | 0 | 8  | 11      | U | F.AKHPRMGY.L + Oxidation (M)          |
| 3380 | - | 3387 | 488.2449  | 974.4753  | 974.4756  | -0.29  | 0 | 16 | 1.7     | U | F.AKHPRMGY.L + Oxidation (M)          |
| 3380 | - | 3387 | 325.8325  | 974.4756  | 974.4756  | 0.039  | 0 | 9  | 7.2     | U | F.AKHPRMGY.L + Oxidation (M)          |
| 3380 | - | 3387 | 480.2471  | 958.4796  | 958.4807  | -1.14  | 0 | 16 | 1.5     | U | F.AKHPRMGY.L                          |
| 3380 | - | 3387 | 320.5006  | 958.4801  | 958.4807  | -0.61  | 0 | 13 | 3       | U | F.AKHPRMGY.L                          |
| 3380 | - | 3387 | 480.2476  | 958.4806  | 958.4807  | -0.058 | 0 | 8  | 9.2     | U | F.AKHPRMGY.L                          |
| 3380 | - | 3387 | 320.5008  | 958.4806  | 958.4807  | -0.04  | 0 | 3  | 26      | U | F.AKHPRMGY.L                          |
| 3380 | - | 3387 | 480.2477  | 958.4807  | 958.4807  | 0.069  | 0 | 22 | 0.33    | U | F.AKHPRMGY.L                          |
| 3380 | - | 3387 | 480.2477  | 958.4807  | 958.4807  | 0.069  | 0 | 12 | 3.1     | U | F.AKHPRMGY.L                          |
| 3380 | - | 3387 | 480.2479  | 958.4812  | 958.4807  | 0.52   | 0 | 24 | 0.23    | U | F.AKHPRMGY.L                          |
| 3380 | - | 3387 | 480.2481  | 958.4816  | 958.4807  | 0.96   | 0 | 26 | 0.13    | U | F.AKHPRMGY.L                          |
| 3380 | - | 3387 | 320.5013  | 958.4821  | 958.4807  | 1.49   | 0 | 6  | 14      | U | F.AKHPRMGY.L                          |
| 3380 | - | 3387 | 480.7483  | 959.482   | 958.4807  | 1045   | 0 | 13 | 2.8     | U | F.AKHPRMGY.L                          |
| 3380 | - | 3387 | 325.8324  | 974.4754  | 974.4756  | -0.24  | 0 | 8  | 9.3     | U | F.AKHPRMGY.L + Oxidation (M)          |
| 3380 | - | 3387 | 488.245   | 974.4755  | 974.4756  | -0.1   | 0 | 24 | 0.23    | U | F.AKHPRMGY.L + Oxidation (M)          |
| 3388 | - | 3394 | 385.2443  | 768.474   | 768.4745  | -0.75  | 0 | 40 | 0.0014  |   | Y.LPVQTVL.E                           |
| 3388 | - | 3405 | 652.6713  | 1954.992  | 1954.9922 | -0.097 | 1 | 40 | 0.004   | U | Y.LPVQTVLEGDNMETPVTL.I                |
| 3388 | - | 3394 | 385.2445  | 768.4745  | 768.4745  | -0.11  | 0 | 38 | 0.0024  |   | Y.LPVQTVL.E                           |
| 3388 | - | 3405 | 652.6716  | 1954.9929 | 1954.9922 | 0.37   | 1 | 46 | 0.0012  | U | Y.LPVQTVLEGDNMETPVTL.I                |
| 3388 | - | 3405 | 1018.4821 | 2034.9496 | 2034.9585 | -4.38  | 1 | 0  | 62      | U | Y.LPVQTVLEGDNMETPVTL.I + Phospho (ST) |
| 3388 | - | 3394 | 385.2446  | 768.4746  | 768.4745  | 0.047  | 0 | 40 | 0.0016  |   | Y.LPVQTVL.E                           |
| 3388 | - | 3405 | 652.6711  | 1954.9916 | 1954.9922 | -0.28  | 1 | 46 | 0.0011  | U | Y.LPVQTVLEGDNMETPVTL.I                |
| 3388 | - | 3394 | 385.2445  | 768.4744  | 768.4745  | -0.19  | 0 | 38 | 0.0025  |   | Y.LPVQTVL.E                           |
| 3388 | - | 3405 | 652.6715  | 1954.9927 | 1954.9922 | 0.28   | 1 | 38 | 0.0065  | U | Y.LPVQTVLEGDNMETPVTL.I                |
| 3395 | - | 3405 | 603.2721  | 1204.5296 | 1204.5282 | 1.22   | 0 | 37 | 0.019   | U | L.EGDNMETPVTL.I                       |
| 3395 | - | 3405 | 603.2714  | 1204.5283 | 1204.5282 | 0.1    | 0 | 35 | 0.029   | U | L.EGDNMETPVTL.I                       |
| 3395 | - | 3405 | 603.2715  | 1204.5285 | 1204.5282 | 0.31   | 0 | 15 | 2.7     | U | L.EGDNMETPVTL.I                       |
| 3395 | - | 3405 | 603.2719  | 1204.5293 | 1204.5282 | 0.92   | 0 | 59 | 0.00011 | U | L.EGDNMETPVTL.I                       |
| 3406 | - | 3421 | 864.9318  | 1727.849  | 1727.8519 | -1.68  | 1 | 1  | 60      | U | L.INFWPVDSAPASSPQL.S                  |

|      |   |      |          |           |           |        |   |    |          |   |                                     |
|------|---|------|----------|-----------|-----------|--------|---|----|----------|---|-------------------------------------|
| 3422 | - | 3433 | 499.5555 | 1495.6447 | 1495.644  | 0.46   | 0 | 12 | 4.8      | U | L.SHDDTHSRIEHY.A                    |
| 3422 | - | 3433 | 499.5559 | 1495.6458 | 1495.644  | 1.2    | 0 | 11 | 7.1      | U | L.SHDDTHSRIEHY.A                    |
| 3434 | - | 3447 | 764.8384 | 1527.6622 | 1527.6623 | -0.077 | 1 | 53 | 0.00046  | U | Y.ASRLAEMENSNNGSY.L                 |
| 3434 | - | 3447 | 772.8369 | 1543.6593 | 1543.6572 | 1.32   | 1 | 43 | 0.0038   | U | Y.ASRLAEMENSNNGSY.L + Oxidation (M) |
| 3434 | - | 3447 | 764.8381 | 1527.6616 | 1527.6623 | -0.48  | 1 | 56 | 0.00024  | U | Y.ASRLAEMENSNNGSY.L                 |
| 3434 | - | 3447 | 772.8368 | 1543.659  | 1543.6572 | 1.16   | 1 | 49 | 0.00096  | U | Y.ASRLAEMENSNNGSY.L + Oxidation (M) |
| 3434 | - | 3447 | 764.8381 | 1527.6617 | 1527.6623 | -0.4   | 1 | 48 | 0.0013   | U | Y.ASRLAEMENSNNGSY.L                 |
| 3434 | - | 3447 | 765.3406 | 1528.6667 | 1527.6623 | 657    | 1 | 42 | 0.006    | U | Y.ASRLAEMENSNNGSY.L                 |
| 3434 | - | 3447 | 772.8351 | 1543.6556 | 1543.6572 | -1.05  | 1 | 55 | 0.00023  | U | Y.ASRLAEMENSNNGSY.L + Oxidation (M) |
| 3434 | - | 3447 | 764.838  | 1527.6615 | 1527.6623 | -0.56  | 1 | 51 | 0.00072  | U | Y.ASRLAEMENSNNGSY.L                 |
| 3434 | - | 3447 | 772.8344 | 1543.6543 | 1543.6572 | -1.92  | 1 | 18 | 1.3      | U | Y.ASRLAEMENSNNGSY.L + Oxidation (M) |
| 3448 | - | 3463 | 899.4099 | 1796.8053 | 1796.8064 | -0.64  | 1 | 49 | 0.00094  | U | Y.LNDSISPNESIDDEHL.L                |
| 3448 | - | 3463 | 899.4098 | 1796.805  | 1796.8064 | -0.78  | 1 | 60 | 7.50E-05 | U | Y.LNDSISPNESIDDEHL.L                |
| 3448 | - | 3463 | 899.4103 | 1796.8061 | 1796.8064 | -0.17  | 1 | 59 | 9.40E-05 | U | Y.LNDSISPNESIDDEHL.L                |
| 3449 | - | 3464 | 899.4086 | 1796.8027 | 1796.8064 | -2.07  | 1 | 52 | 0.00054  | U | L.NDSISPNESIDDEHLL.I                |
| 3449 | - | 3464 | 899.4104 | 1796.8062 | 1796.8064 | -0.1   | 1 | 41 | 0.0062   | U | L.NDSISPNESIDDEHLL.I                |
| 3449 | - | 3464 | 899.4105 | 1796.8065 | 1796.8064 | 0.036  | 1 | 46 | 0.0019   | U | L.NDSISPNESIDDEHLL.I                |
| 3449 | - | 3463 | 843.3702 | 1684.7258 | 1683.7224 | 596    | 0 | 39 | 0.0092   | U | L.NDSISPNESIDDEHL.L                 |
| 3449 | - | 3464 | 899.4077 | 1796.8009 | 1796.8064 | -3.09  | 1 | 37 | 0.015    | U | L.NDSISPNESIDDEHLL.I                |
| 3464 | - | 3468 | 337.187  | 672.3595  | 672.3595  | -0.037 | 1 | 6  | 6.9      | U | L.LIQHY.C                           |
| 3464 | - | 3468 | 337.1868 | 672.359   | 672.3595  | -0.76  | 1 | 7  | 6.7      | U | L.LIQHY.C                           |
| 3464 | - | 3468 | 337.187  | 672.3594  | 672.3595  | -0.13  | 1 | 7  | 6.6      | U | L.LIQHY.C                           |
| 3464 | - | 3468 | 337.187  | 672.3595  | 672.3595  | 0.052  | 1 | 8  | 4.8      | U | L.LIQHY.C                           |
| 3469 | - | 3478 | 552.7533 | 1103.492  | 1103.4917 | 0.3    | 1 | 21 | 0.74     | U | Y.CQSLNQDSPL.S                      |
| 3479 | - | 3488 | 548.809  | 1095.6034 | 1095.6036 | -0.25  | 0 | 27 | 0.067    | U | L.SQPRSPAQIL.I                      |
| 3479 | - | 3488 | 548.8092 | 1095.6039 | 1095.6036 | 0.2    | 0 | 26 | 0.084    | U | L.SQPRSPAQIL.I                      |
| 3479 | - | 3488 | 548.8096 | 1095.6046 | 1095.6036 | 0.87   | 0 | 6  | 8.1      | U | L.SQPRSPAQIL.I                      |
| 3479 | - | 3488 | 588.7923 | 1175.57   | 1175.57   | 0.068  | 0 | 29 | 0.1      | U | L.SQPRSPAQIL.I + Phospho (ST)       |
| 3479 | - | 3488 | 548.8092 | 1095.6039 | 1095.6036 | 0.2    | 0 | 27 | 0.066    | U | L.SQPRSPAQIL.I                      |
| 3479 | - | 3488 | 548.8093 | 1095.6041 | 1095.6036 | 0.42   | 0 | 28 | 0.055    | U | L.SQPRSPAQIL.I                      |
| 3479 | - | 3488 | 548.81   | 1095.6054 | 1095.6036 | 1.65   | 0 | 7  | 6.9      | U | L.SQPRSPAQIL.I                      |
| 3479 | - | 3488 | 548.8106 | 1095.6067 | 1095.6036 | 2.76   | 0 | 12 | 2.3      | U | L.SQPRSPAQIL.I                      |
| 3479 | - | 3488 | 588.7917 | 1175.5689 | 1175.57   | -0.87  | 0 | 18 | 1.1      | U | L.SQPRSPAQIL.I + Phospho (ST)       |
| 3479 | - | 3488 | 548.8087 | 1095.6029 | 1095.6036 | -0.69  | 0 | 28 | 0.048    | U | L.SQPRSPAQIL.I                      |
| 3479 | - | 3488 | 548.8094 | 1095.6043 | 1095.6036 | 0.64   | 0 | 24 | 0.14     | U | L.SQPRSPAQIL.I                      |
| 3479 | - | 3488 | 588.7924 | 1175.5703 | 1175.57   | 0.28   | 0 | 16 | 2        | U | L.SQPRSPAQIL.I + Phospho (ST)       |
| 3479 | - | 3488 | 548.8089 | 1095.6032 | 1095.6036 | -0.36  | 0 | 27 | 0.068    | U | L.SQPRSPAQIL.I                      |
| 3479 | - | 3488 | 548.8093 | 1095.6041 | 1095.6036 | 0.42   | 0 | 28 | 0.057    | U | L.SQPRSPAQIL.I                      |

|      |   |      |          |           |           |        |   |    |          |   |                                     |
|------|---|------|----------|-----------|-----------|--------|---|----|----------|---|-------------------------------------|
| 3479 | - | 3488 | 548.8101 | 1095.6057 | 1095.6036 | 1.87   | 0 | 12 | 2.2      | U | L.SQPRSPAQIL.I                      |
| 3479 | - | 3488 | 588.792  | 1175.5694 | 1175.57   | -0.45  | 0 | 26 | 0.18     | U | L.SQPRSPAQIL.I + Phospho (ST)       |
| 3504 | - | 3513 | 601.786  | 1201.5575 | 1201.5574 | 0.017  | 1 | 69 | 8.80E-06 | U | L.ADLEENRNL.Q                       |
| 3504 | - | 3513 | 601.7867 | 1201.5589 | 1201.5574 | 1.24   | 1 | 69 | 8.90E-06 | U | L.ADLEENRNL.Q                       |
| 3504 | - | 3513 | 601.786  | 1201.5575 | 1201.5574 | 0.017  | 1 | 52 | 0.00046  | U | L.ADLEENRNL.Q                       |
| 3504 | - | 3513 | 602.2884 | 1202.5622 | 1201.5574 | 836    | 1 | 69 | 1.00E-05 | U | L.ADLEENRNL.Q                       |
| 3504 | - | 3513 | 601.7861 | 1201.5577 | 1201.5574 | 0.22   | 1 | 64 | 2.70E-05 | U | L.ADLEENRNL.Q                       |
| 3514 | - | 3520 | 447.7195 | 893.4244  | 893.4243  | 0.091  | 1 | 40 | 0.0076   | U | L.QAEYDRL.K                         |
| 3514 | - | 3520 | 447.7189 | 893.4233  | 893.4243  | -1.14  | 1 | 45 | 0.0026   | U | L.QAEYDRL.K                         |
| 3514 | - | 3520 | 447.7194 | 893.4243  | 893.4243  | 0.021  | 1 | 40 | 0.0079   | U | L.QAEYDRL.K                         |
| 3514 | - | 3520 | 447.7193 | 893.424   | 893.4243  | -0.25  | 1 | 40 | 0.0079   | U | L.QAEYDRL.K                         |
| 3518 | - | 3529 | 496.939  | 1487.7953 | 1487.7957 | -0.29  | 1 | 36 | 0.01     | U | Y.DRLKQQHEHKGL.S                    |
| 3518 | - | 3529 | 372.9563 | 1487.7962 | 1487.7957 | 0.35   | 1 | 38 | 0.0069   | U | Y.DRLKQQHEHKGL.S                    |
| 3518 | - | 3529 | 496.9396 | 1487.7971 | 1487.7957 | 0.94   | 1 | 3  | 21       | U | Y.DRLKQQHEHKGL.S                    |
| 3518 | - | 3529 | 372.9562 | 1487.7956 | 1487.7957 | -0.054 | 1 | 24 | 0.18     | U | Y.DRLKQQHEHKGL.S                    |
| 3518 | - | 3529 | 496.9393 | 1487.7961 | 1487.7957 | 0.26   | 1 | 30 | 0.04     | U | Y.DRLKQQHEHKGL.S                    |
| 3518 | - | 3529 | 496.9388 | 1487.7944 | 1487.7957 | -0.85  | 1 | 31 | 0.036    | U | Y.DRLKQQHEHKGL.S                    |
| 3518 | - | 3529 | 496.9392 | 1487.7957 | 1487.7957 | 0.014  | 1 | 14 | 1.6      | U | Y.DRLKQQHEHKGL.S                    |
| 3518 | - | 3529 | 372.9563 | 1487.7961 | 1487.7957 | 0.27   | 1 | 36 | 0.0097   | U | Y.DRLKQQHEHKGL.S                    |
| 3518 | - | 3529 | 497.2738 | 1488.7995 | 1487.7957 | 675    | 1 | 2  | 30       | U | Y.DRLKQQHEHKGL.S                    |
| 3518 | - | 3529 | 496.9387 | 1487.7942 | 1487.7957 | -0.97  | 1 | 24 | 0.15     | U | Y.DRLKQQHEHKGL.S                    |
| 3518 | - | 3529 | 372.956  | 1487.7949 | 1487.7957 | -0.55  | 1 | 10 | 4.2      | U | Y.DRLKQQHEHKGL.S                    |
| 3518 | - | 3529 | 496.9389 | 1487.795  | 1487.7957 | -0.48  | 1 | 37 | 0.0079   | U | Y.DRLKQQHEHKGL.S                    |
| 3518 | - | 3529 | 372.9562 | 1487.7958 | 1487.7957 | 0.11   | 1 | 24 | 0.18     | U | Y.DRLKQQHEHKGL.S                    |
| 3521 | - | 3551 | 691.1466 | 3450.6966 | 3448.6867 | 583    | 1 | 8  | 2.9      | U | L.KQQHEHKGLSPLPSPPEMMPTSPQSPRDAEL.I |
| 3521 | - | 3529 | 368.8685 | 1103.5836 | 1103.5836 | 0.0063 | 0 | 30 | 0.064    | U | L.KQQHEHKGL.S                       |
| 3521 | - | 3529 | 368.8684 | 1103.5833 | 1103.5836 | -0.24  | 0 | 25 | 0.2      | U | L.KQQHEHKGL.S                       |
| 3521 | - | 3529 | 368.8687 | 1103.5841 | 1103.5836 | 0.5    | 0 | 27 | 0.12     | U | L.KQQHEHKGL.S                       |
| 3521 | - | 3551 | 690.7443 | 3448.6849 | 3448.6867 | -0.52  | 1 | 8  | 3.1      | U | L.KQQHEHKGLSPLPSPPEMMPTSPQSPRDAEL.I |
| 3521 | - | 3551 | 690.9449 | 3449.6883 | 3448.6867 | 290    | 1 | 3  | 9.4      | U | L.KQQHEHKGLSPLPSPPEMMPTSPQSPRDAEL.I |
| 3521 | - | 3551 | 863.6808 | 3450.6943 | 3448.6867 | 582    | 1 | 14 | 0.79     | U | L.KQQHEHKGLSPLPSPPEMMPTSPQSPRDAEL.I |
| 3530 | - | 3557 | 997.1697 | 2988.4872 | 2988.4936 | -2.14  | 1 | 9  | 2.6      | U | L.SPLPSPPEMMPTSPQSPRDAELIAEAKL.L    |
| 3530 | - | 3557 | 997.5079 | 2989.502  | 2988.4936 | 337    | 1 | 10 | 1.7      | U | L.SPLPSPPEMMPTSPQSPRDAELIAEAKL.L    |
| 3530 | - | 3551 | 788.7127 | 2363.1163 | 2363.1137 | 1.1    | 0 | 32 | 0.033    | U | L.SPLPSPPEMMPTSPQSPRDAEL.I          |
| 3530 | - | 3557 | 997.1712 | 2988.4918 | 2988.4936 | -0.6   | 1 | 9  | 2.3      | U | L.SPLPSPPEMMPTSPQSPRDAELIAEAKL.L    |
| 3530 | - | 3551 | 788.7135 | 2363.1187 | 2363.1137 | 2.1    | 0 | 33 | 0.029    | U | L.SPLPSPPEMMPTSPQSPRDAEL.I          |
| 3530 | - | 3557 | 997.1719 | 2988.494  | 2988.4936 | 0.13   | 1 | 6  | 4.8      | U | L.SPLPSPPEMMPTSPQSPRDAELIAEAKL.L    |
| 3552 | - | 3557 | 322.7021 | 643.3897  | 643.3904  | -1.08  | 0 | 28 | 0.087    |   | L.IAEAKL.L                          |

|      |   |      |          |           |           |        |   |    |          |                                   |
|------|---|------|----------|-----------|-----------|--------|---|----|----------|-----------------------------------|
| 3552 | - | 3558 | 379.2448 | 756.475   | 756.4745  | 0.67   | 1 | 23 | 0.11     | L.IAEAKLL.R                       |
| 3552 | - | 3557 | 322.7025 | 643.3904  | 643.3904  | -0.04  | 0 | 27 | 0.1      | L.IAEAKL.L                        |
| 3552 | - | 3558 | 379.244  | 756.4735  | 756.4745  | -1.34  | 1 | 28 | 0.043    | L.IAEAKLL.R                       |
| 3552 | - | 3557 | 322.7024 | 643.3902  | 643.3904  | -0.42  | 0 | 30 | 0.051    | L.IAEAKL.L                        |
| 3552 | - | 3558 | 379.2445 | 756.4745  | 756.4745  | -0.054 | 1 | 25 | 0.08     | L.IAEAKLL.R                       |
| 3552 | - | 3557 | 322.7026 | 643.3906  | 643.3904  | 0.25   | 0 | 26 | 0.14     | L.IAEAKL.L                        |
| 3552 | - | 3558 | 379.2445 | 756.4745  | 756.4745  | -0.054 | 1 | 26 | 0.057    | L.IAEAKLL.R                       |
| 3566 | - | 3572 | 430.7366 | 859.4587  | 859.4585  | 0.13   | 0 | 22 | 0.41     | L.EARMQIL.E                       |
| 3566 | - | 3572 | 438.7341 | 875.4536  | 875.4535  | 0.21   | 0 | 11 | 7.2      | L.EARMQIL.E + Oxidation (M)       |
| 3566 | - | 3572 | 430.7365 | 859.4585  | 859.4585  | -0.084 | 0 | 19 | 0.85     | L.EARMQIL.E                       |
| 3566 | - | 3572 | 438.734  | 875.4535  | 875.4535  | 0.074  | 0 | 11 | 6.2      | L.EARMQIL.E + Oxidation (M)       |
| 3566 | - | 3572 | 430.7362 | 859.4579  | 859.4585  | -0.79  | 0 | 21 | 0.61     | L.EARMQIL.E                       |
| 3566 | - | 3572 | 430.7366 | 859.4587  | 859.4585  | 0.13   | 0 | 16 | 1.6      | L.EARMQIL.E                       |
| 3573 | - | 3583 | 447.5528 | 1339.6366 | 1339.6368 | -0.17  | 1 | 22 | 0.57     | L.EDHNKQLESQ.L.H                  |
| 3573 | - | 3583 | 670.8256 | 1339.6367 | 1339.6368 | -0.064 | 1 | 8  | 14       | L.EDHNKQLESQ.L.H                  |
| 3573 | - | 3583 | 670.8249 | 1339.6352 | 1339.6368 | -1.16  | 1 | 11 | 6.5      | L.EDHNKQLESQ.L.H                  |
| 3573 | - | 3583 | 447.5531 | 1339.6375 | 1339.6368 | 0.52   | 1 | 24 | 0.34     | L.EDHNKQLESQ.L.H                  |
| 3573 | - | 3583 | 670.8252 | 1339.6358 | 1339.6368 | -0.7   | 1 | 20 | 0.95     | L.EDHNKQLESQ.L.H                  |
| 3573 | - | 3583 | 447.5527 | 1339.6363 | 1339.6368 | -0.37  | 1 | 41 | 0.0073   | L.EDHNKQLESQ.L.H                  |
| 3573 | - | 3583 | 447.5529 | 1339.6368 | 1339.6368 | 0.04   | 1 | 22 | 0.56     | L.EDHNKQLESQ.L.H                  |
| 3573 | - | 3583 | 670.8267 | 1339.6388 | 1339.6368 | 1.48   | 1 | 18 | 1.3      | L.EDHNKQLESQ.L.H                  |
| 3591 | - | 3611 | 711.0223 | 2130.045  | 2130.0441 | 0.45   | 0 | 6  | 13       | U L.EQPQAEAKVNGTTVSSPSTSL.Q       |
| 3612 | - | 3622 | 631.3135 | 1260.6124 | 1260.6132 | -0.65  | 1 | 37 | 0.014    | U L.QRSDSSQPMLL.R                 |
| 3612 | - | 3622 | 631.816  | 1261.6175 | 1260.6132 | 797    | 1 | 46 | 0.0022   | U L.QRSDSSQPMLL.R                 |
| 3612 | - | 3622 | 639.3116 | 1276.6087 | 1276.6081 | 0.47   | 1 | 28 | 0.12     | U L.QRSDSSQPMLL.R + Oxidation (M) |
| 3612 | - | 3622 | 671.2975 | 1340.5804 | 1340.5795 | 0.65   | 1 | 23 | 0.42     | U L.QRSDSSQPMLL.R + Phospho (ST)  |
| 3612 | - | 3622 | 631.3141 | 1260.6137 | 1260.6132 | 0.42   | 1 | 48 | 0.0011   | U L.QRSDSSQPMLL.R                 |
| 3612 | - | 3622 | 639.3123 | 1276.6101 | 1276.6081 | 1.52   | 1 | 35 | 0.025    | U L.QRSDSSQPMLL.R + Oxidation (M) |
| 3612 | - | 3622 | 671.2968 | 1340.5791 | 1340.5795 | -0.35  | 1 | 16 | 2.3      | U L.QRSDSSQPMLL.R + Phospho (ST)  |
| 3612 | - | 3622 | 631.3137 | 1260.6128 | 1260.6132 | -0.36  | 1 | 48 | 0.0012   | U L.QRSDSSQPMLL.R                 |
| 3612 | - | 3622 | 639.3116 | 1276.6087 | 1276.6081 | 0.47   | 1 | 28 | 0.13     | U L.QRSDSSQPMLL.R + Oxidation (M) |
| 3612 | - | 3622 | 631.314  | 1260.6135 | 1260.6132 | 0.22   | 1 | 57 | 0.00014  | U L.QRSDSSQPMLL.R                 |
| 3612 | - | 3622 | 639.3115 | 1276.6084 | 1276.6081 | 0.18   | 1 | 28 | 0.13     | U L.QRSDSSQPMLL.R + Oxidation (M) |
| 3623 | - | 3638 | 862.3931 | 1722.7716 | 1722.773  | -0.85  | 0 | 23 | 0.43     | U L.RVVGSTSESMGEEDL.L             |
| 3623 | - | 3639 | 918.936  | 1835.8574 | 1835.8571 | 0.16   | 1 | 63 | 4.10E-05 | U L.RVVGSTSESMGEEDLL.S            |
| 3650 | - | 3656 | 439.2023 | 876.39    | 876.3899  | 0.21   | 0 | 7  | 22       | U L.EEVMEQL.N                     |
| 3650 | - | 3656 | 439.2023 | 876.39    | 876.3899  | 0.21   | 0 | 5  | 33       | U L.EEVMEQL.N                     |
